# Supplementary material for: Hybridization and polyploidy enable genomic plasticity without sex in the most devastating plant-parasitic nematodes
Source: PubMed Central journal article supplement (PMC5465968; doi:10.1371/journal.pgen.1006777), 2017-06-08

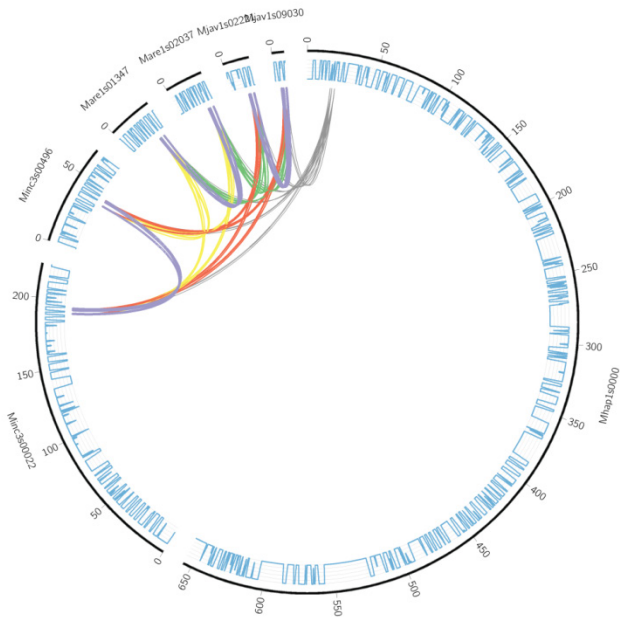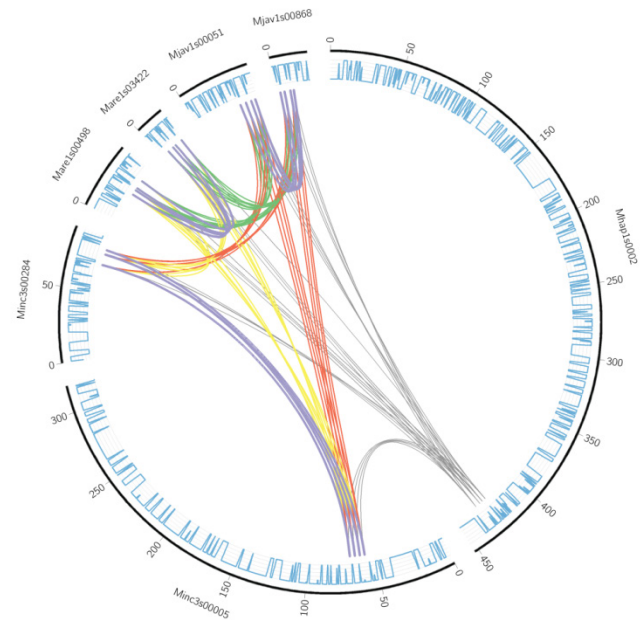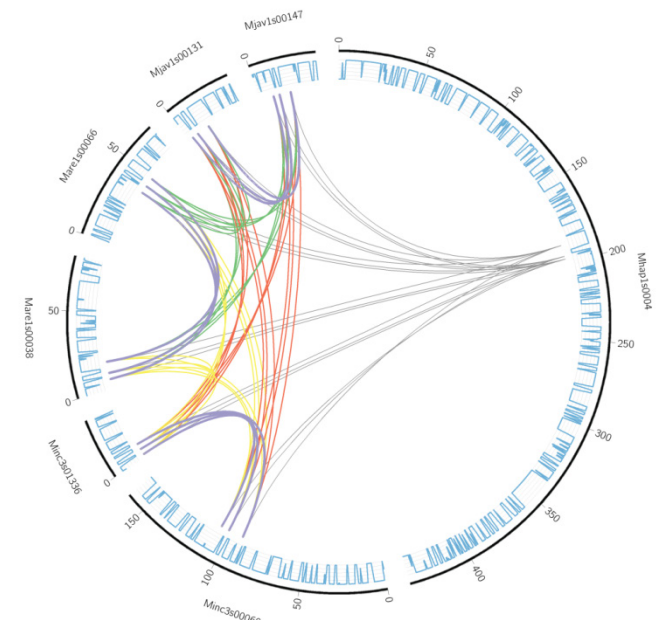

tree block\_0\_3grps\_24genes

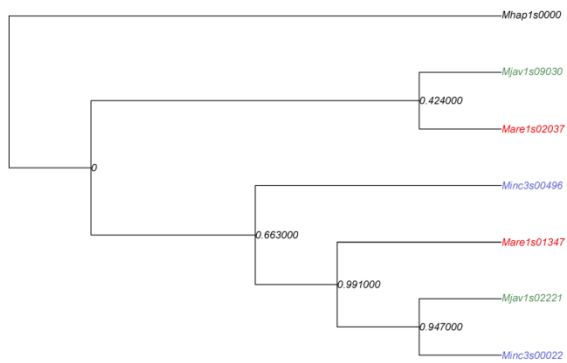

tree block\_1\_4grps\_32genes

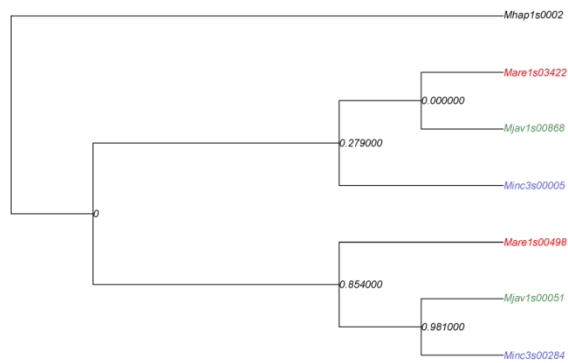

tree block\_2\_3grps\_24genes

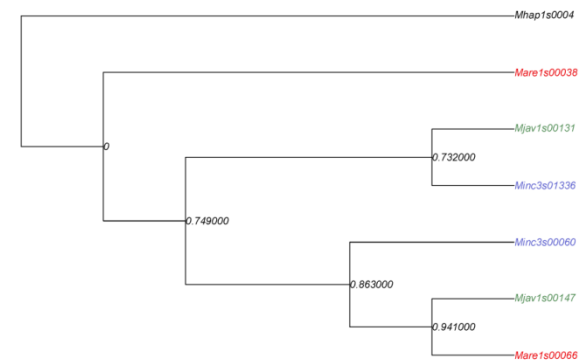

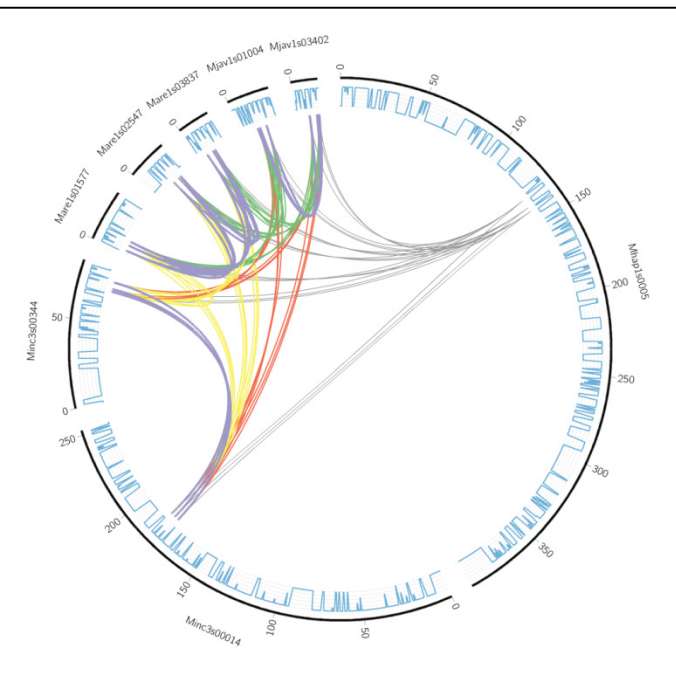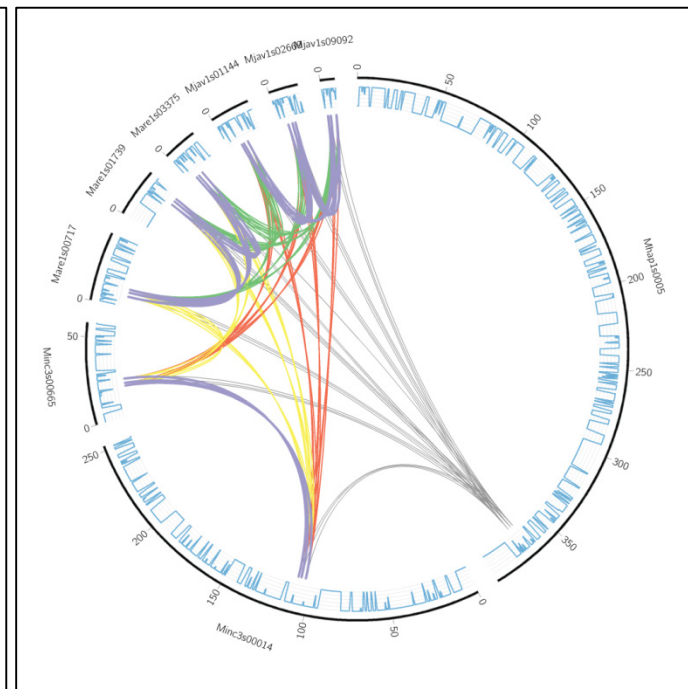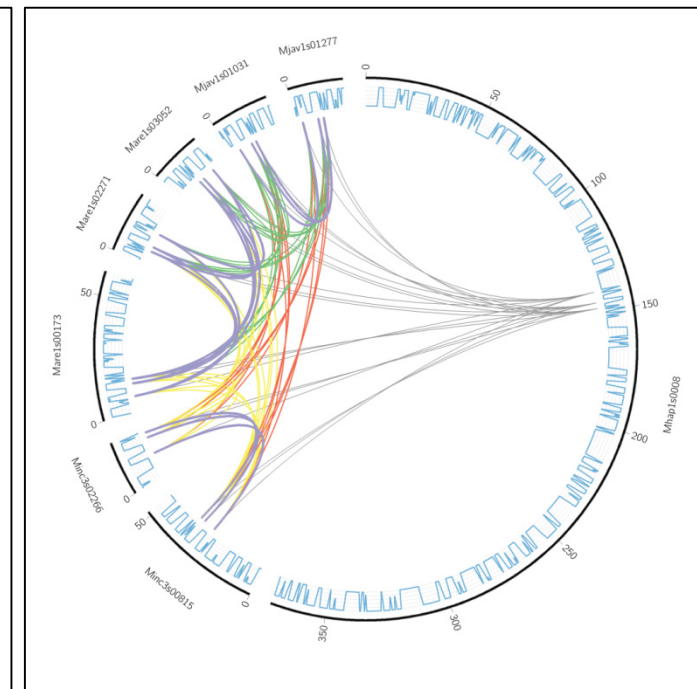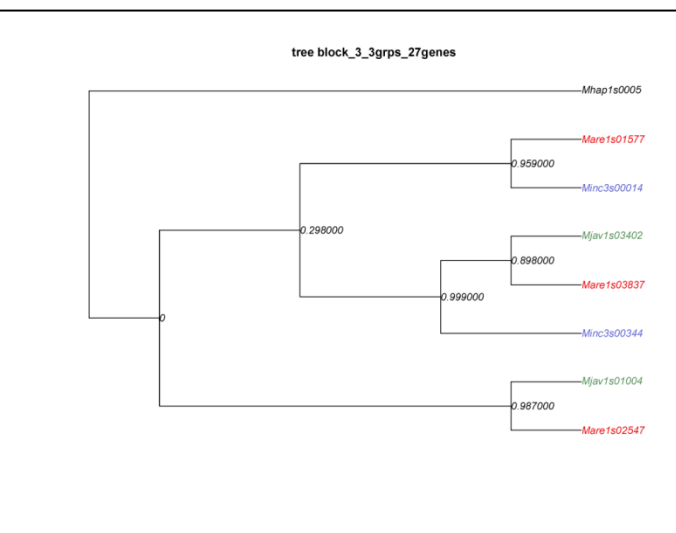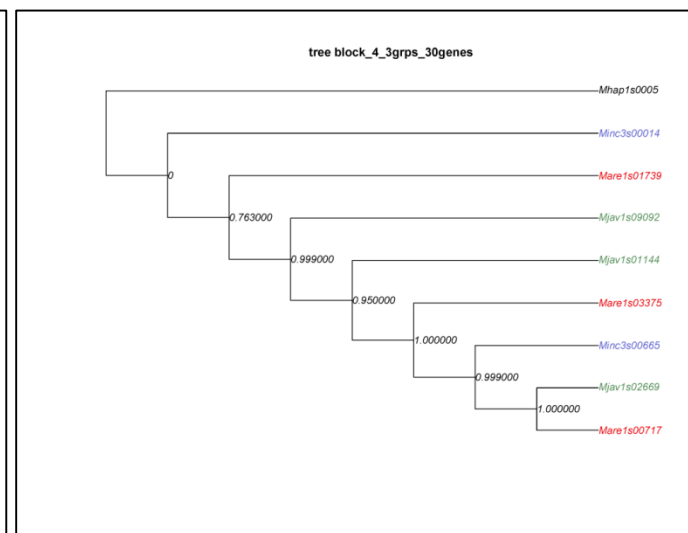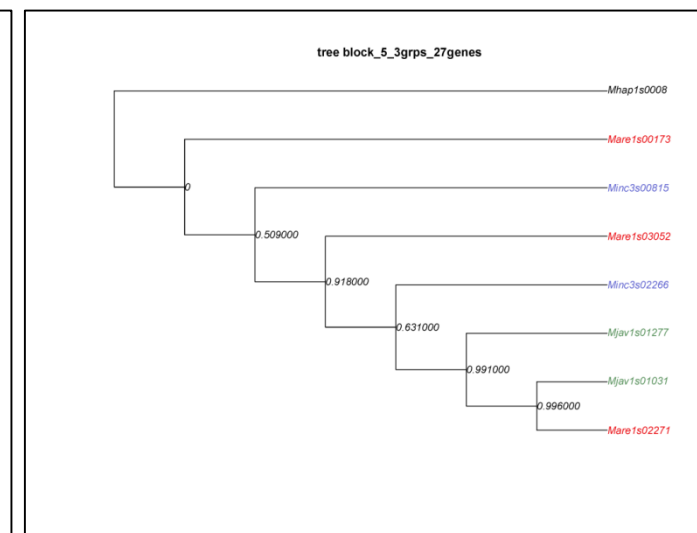



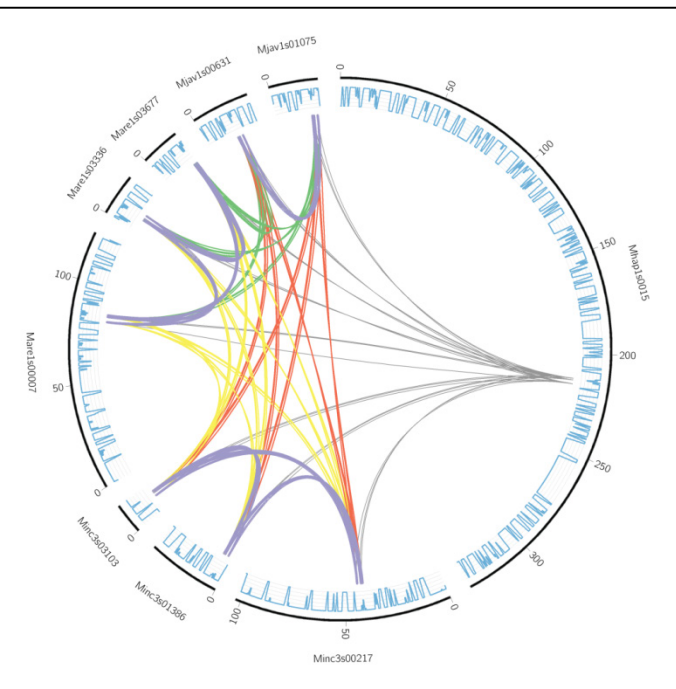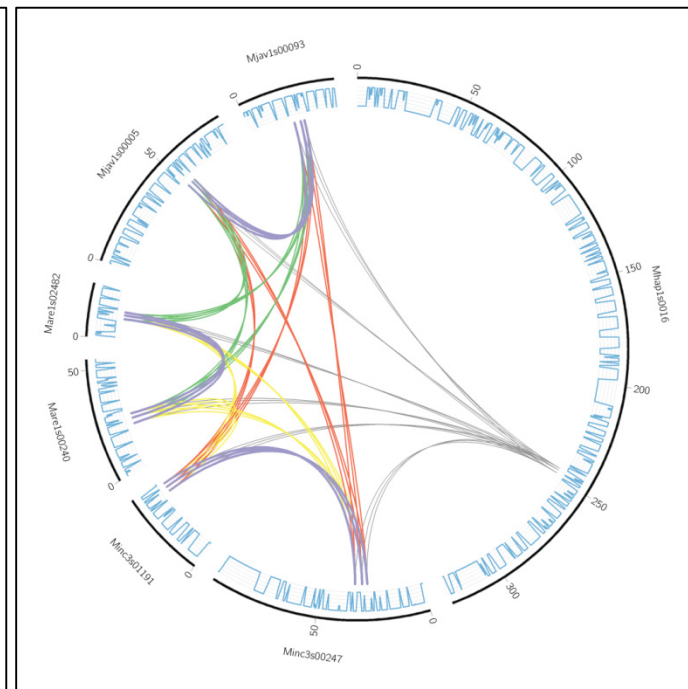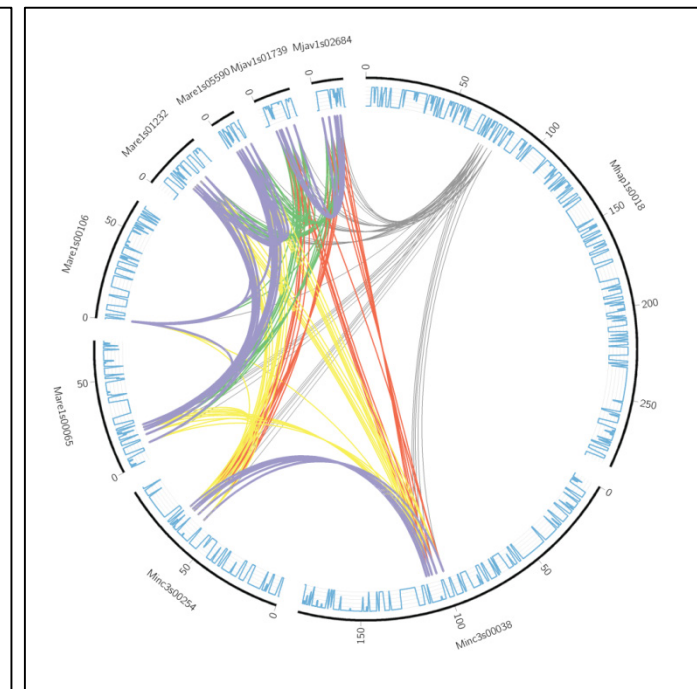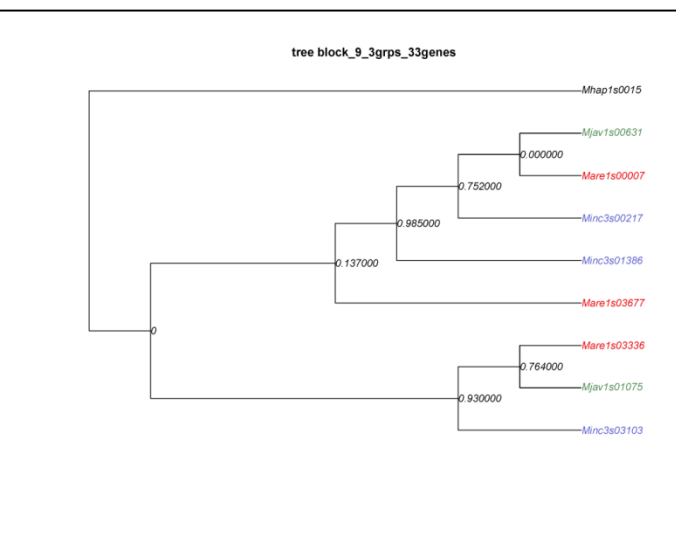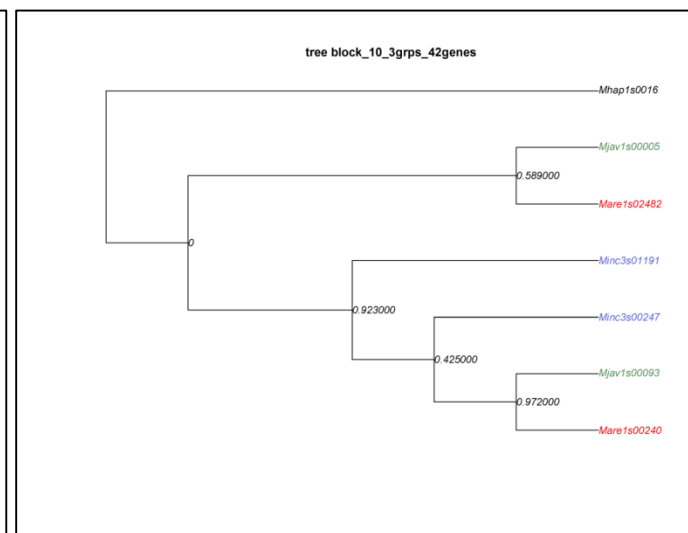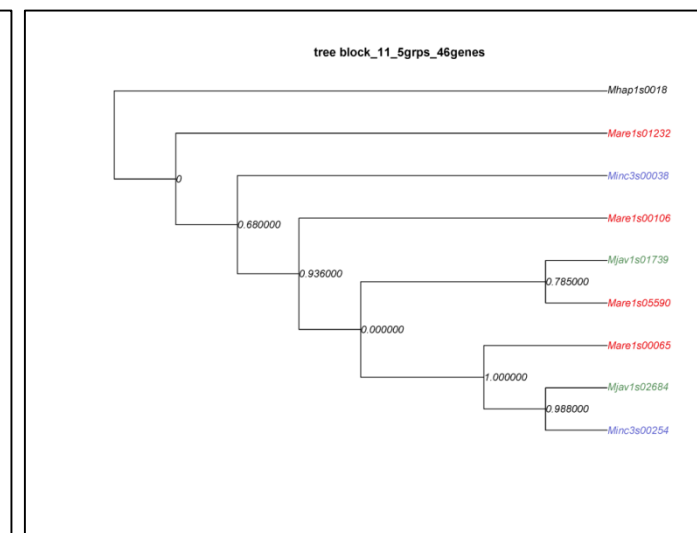

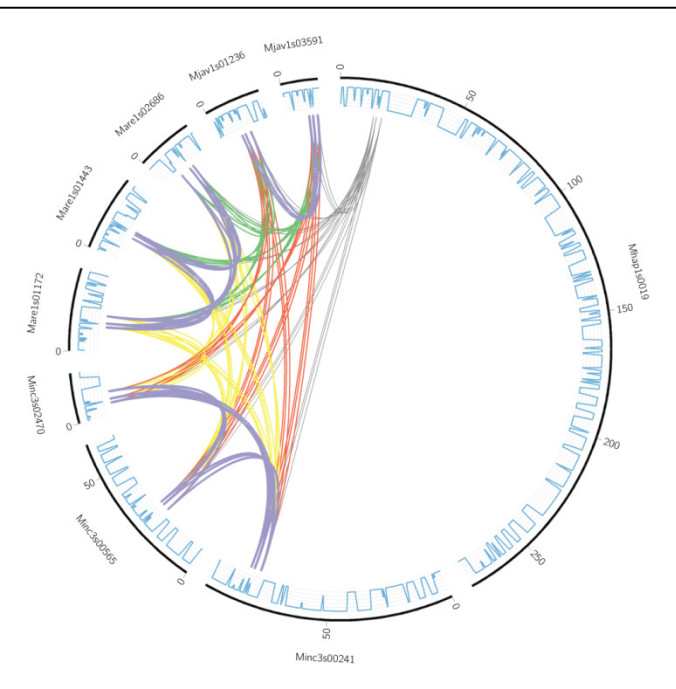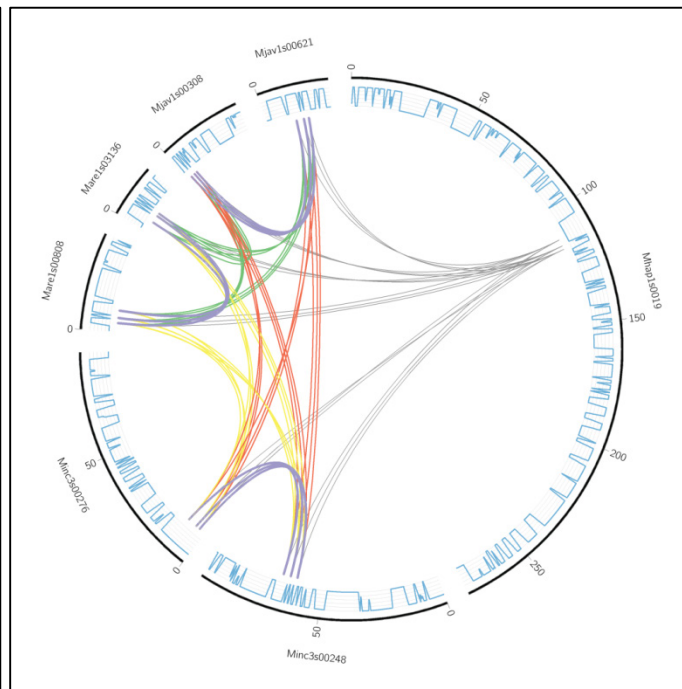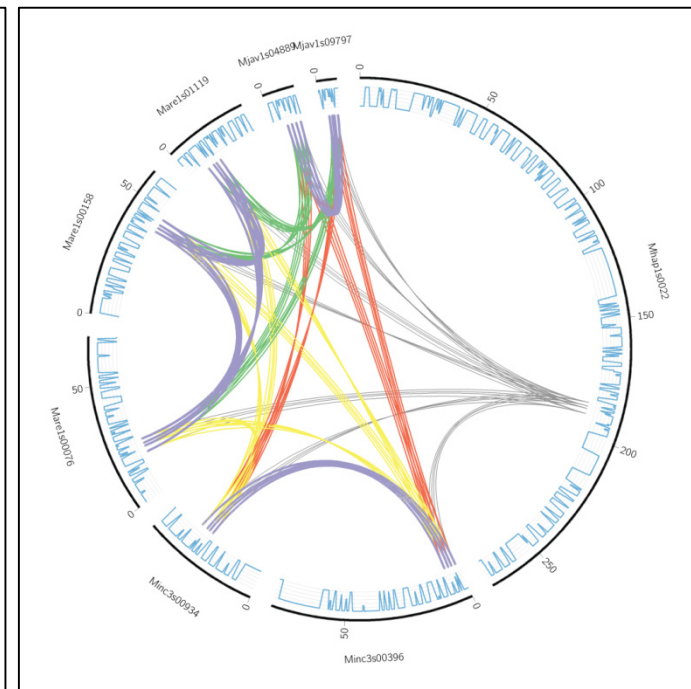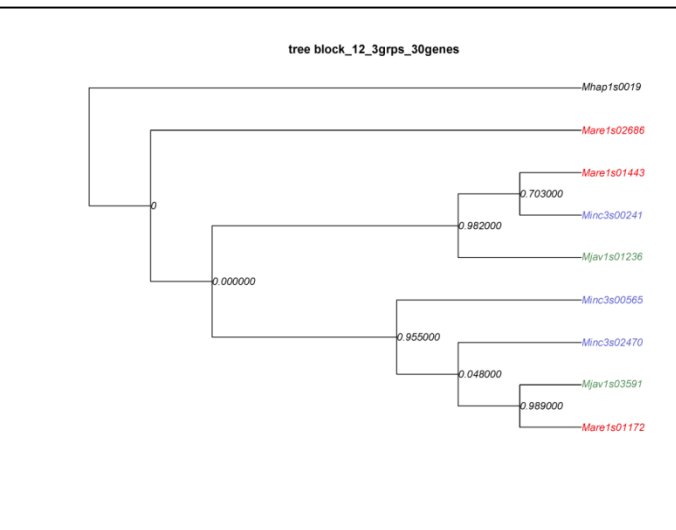

No tree

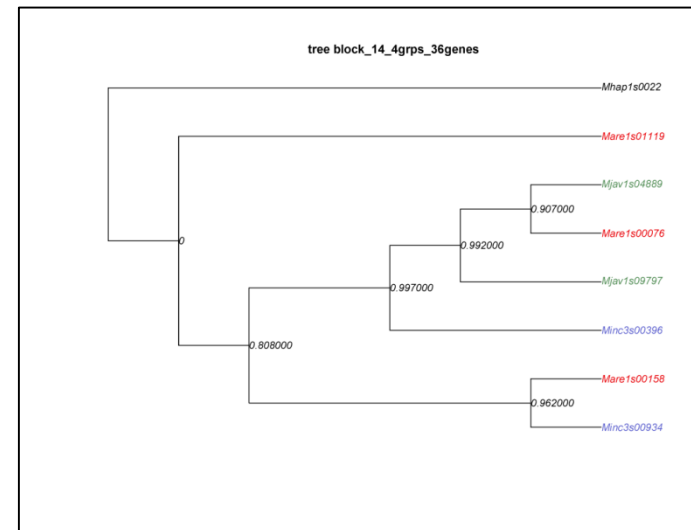



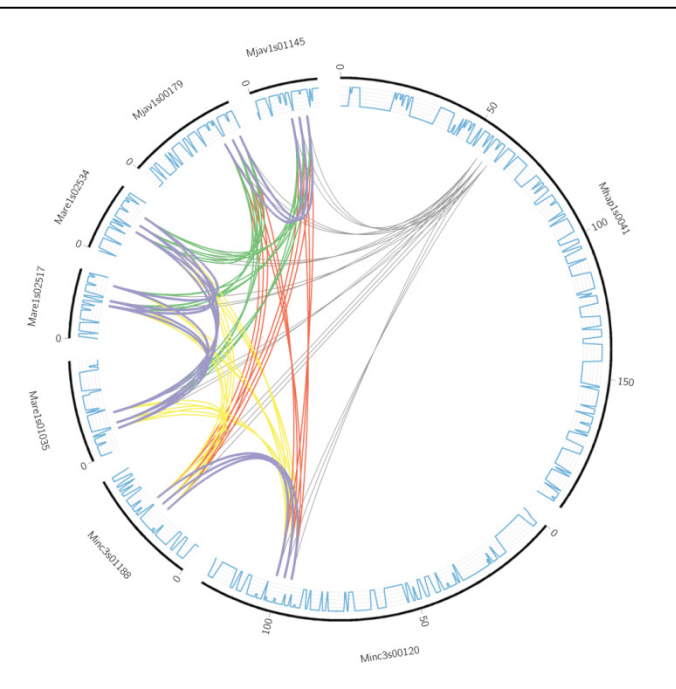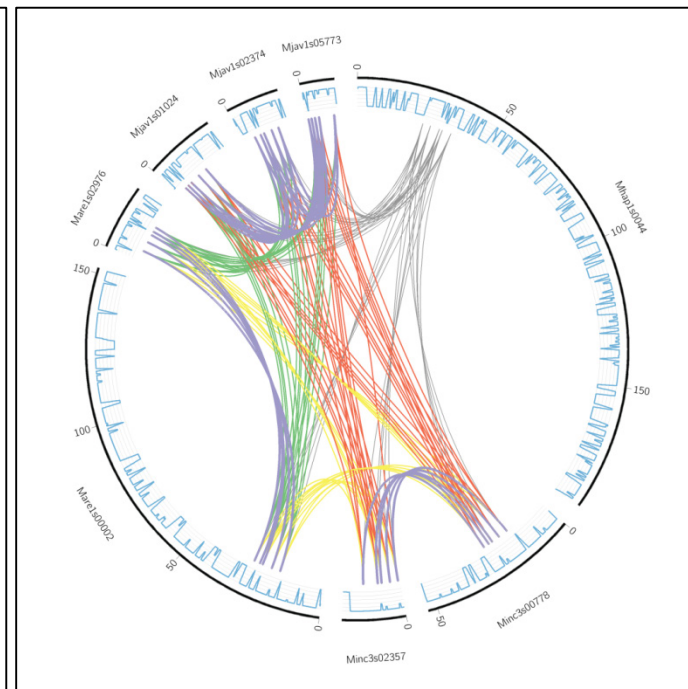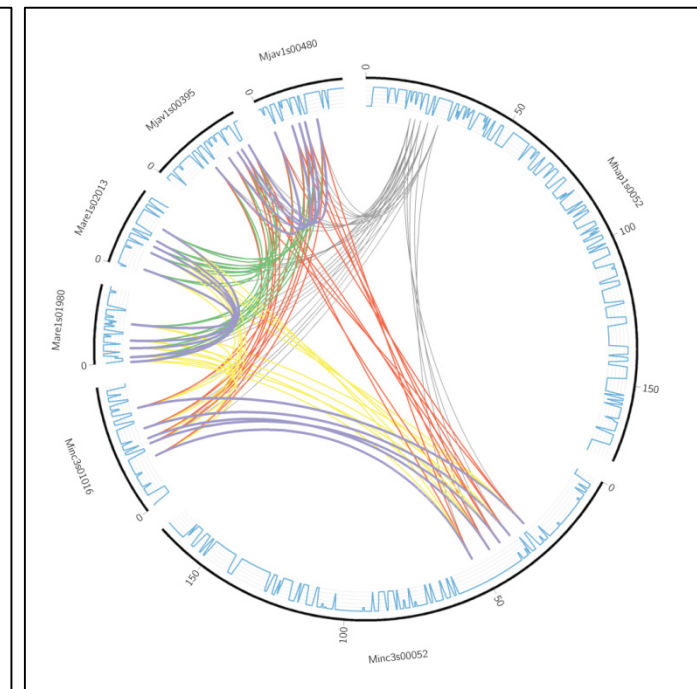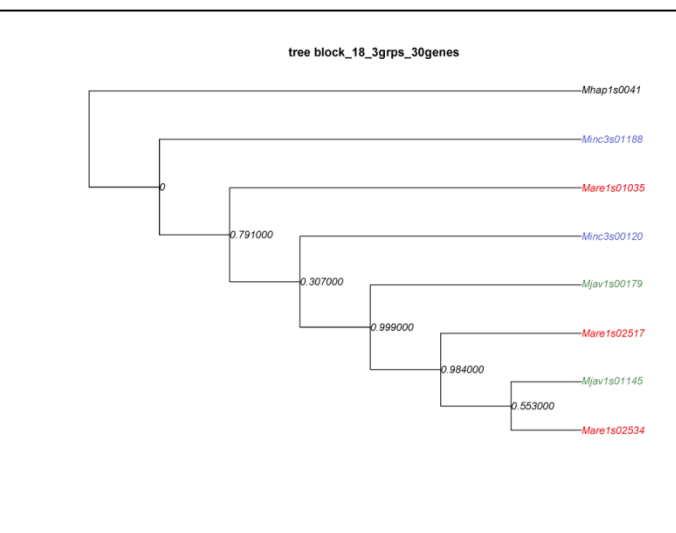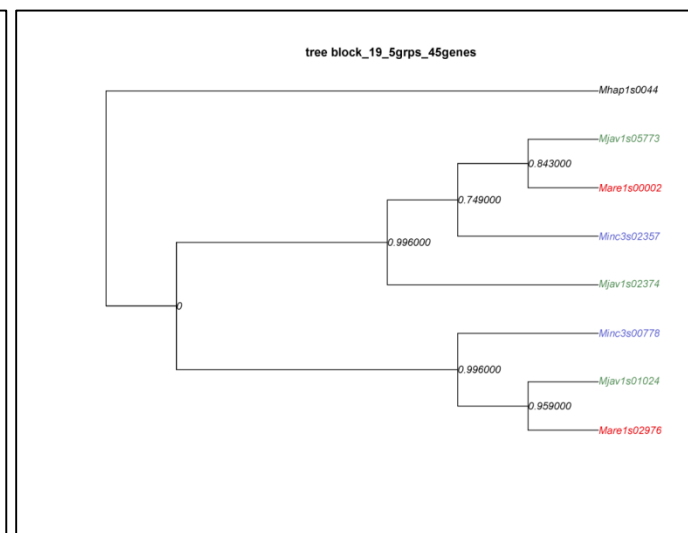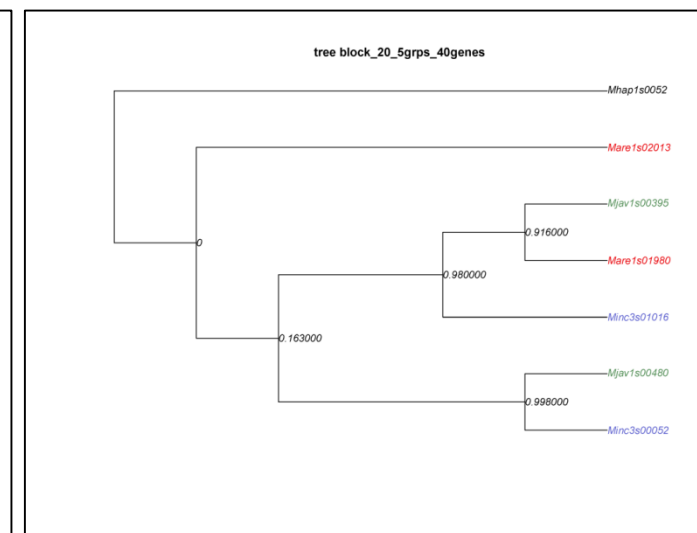

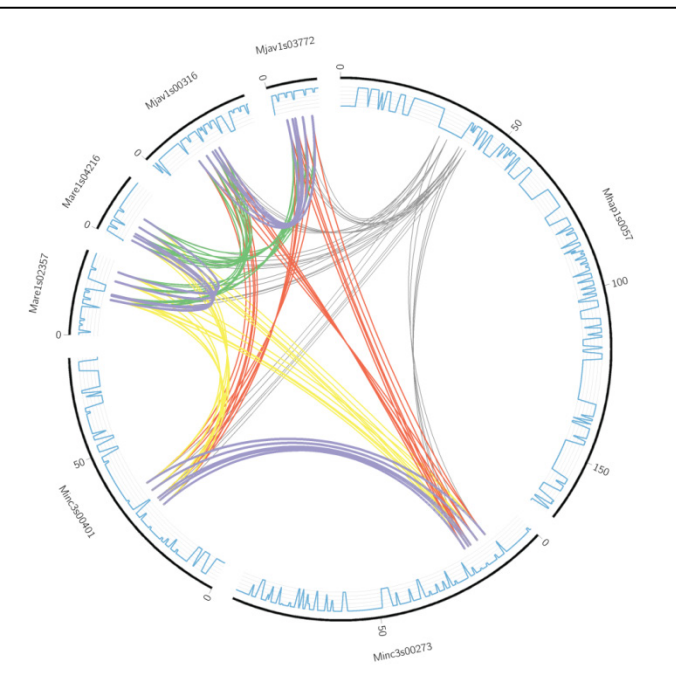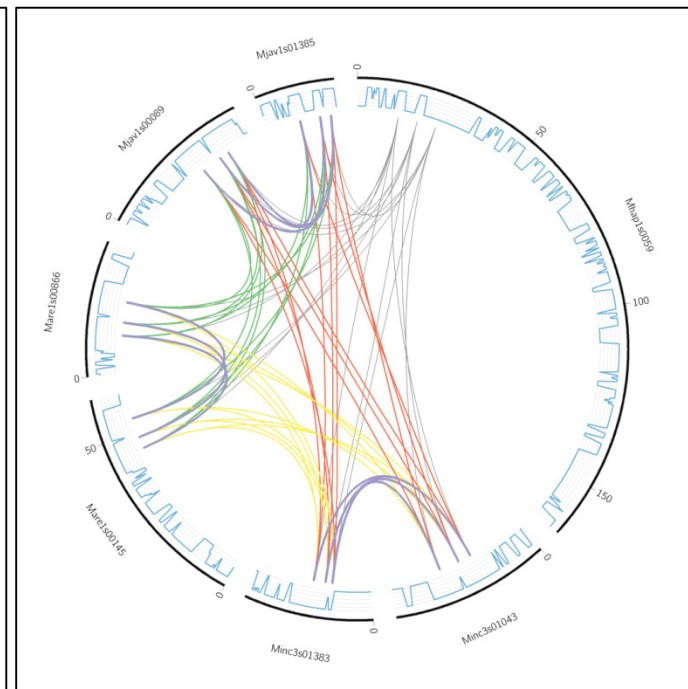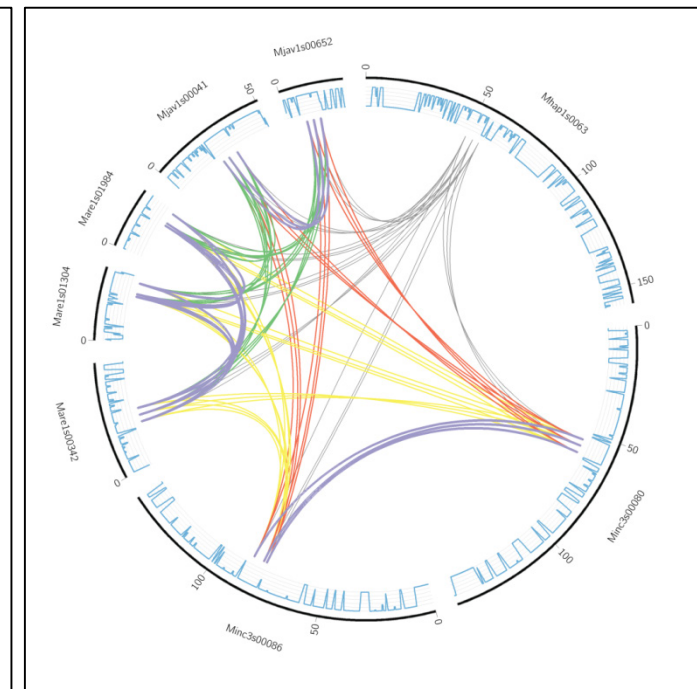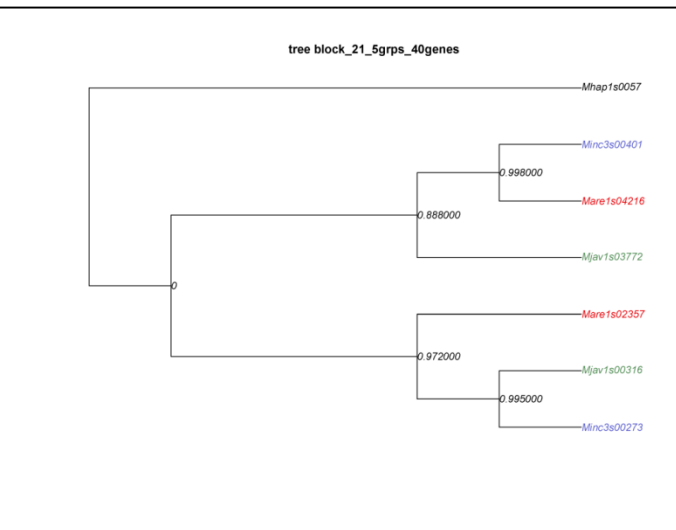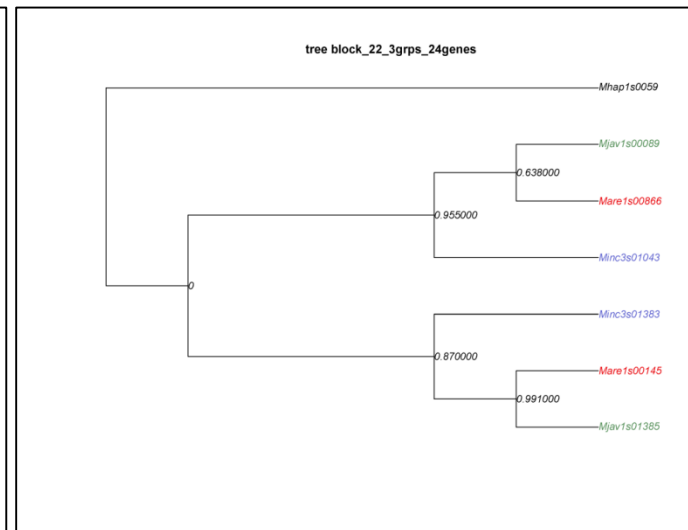

No tree



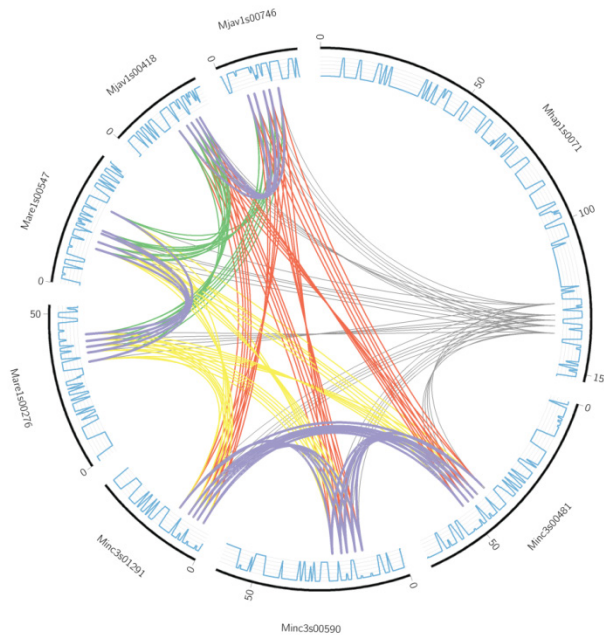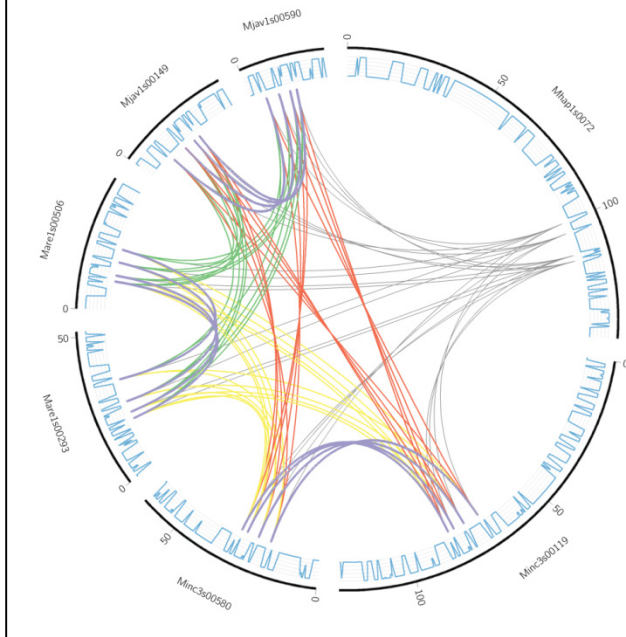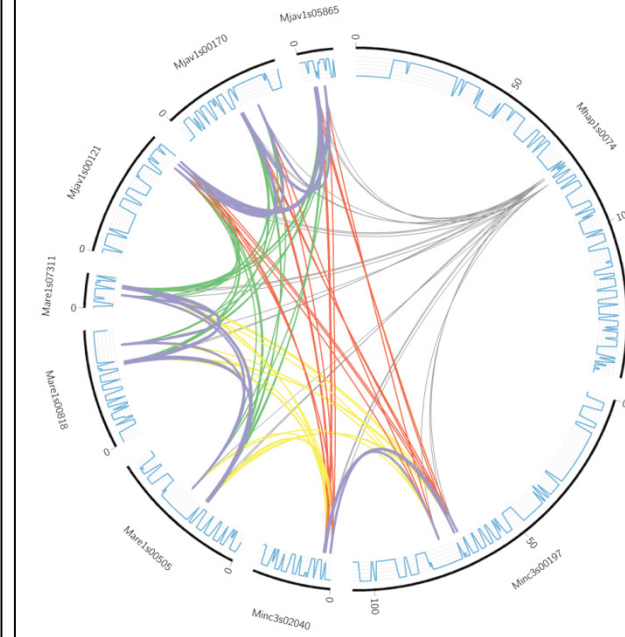

tree block\_24\_5grps\_45genes

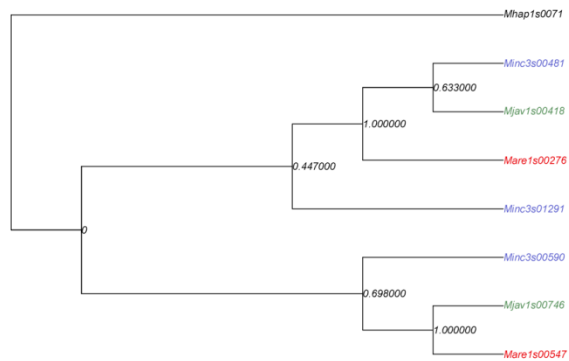

tree block\_25\_4grps\_32genes

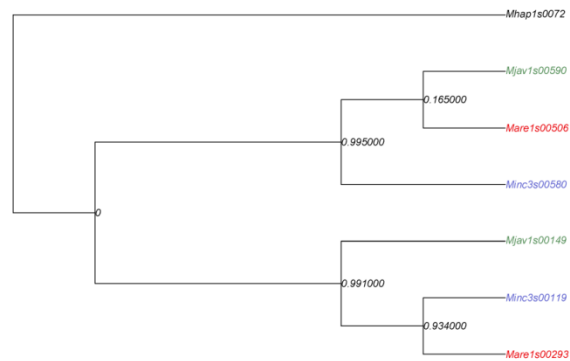

tree block\_26\_3grps\_30genes

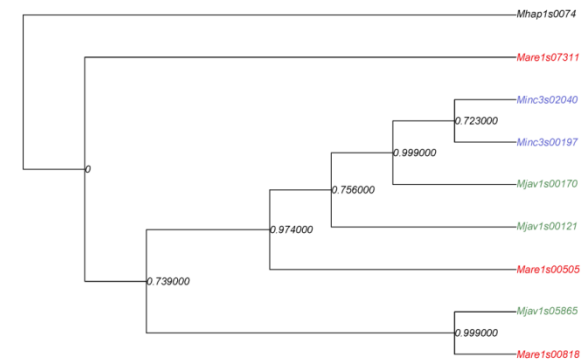

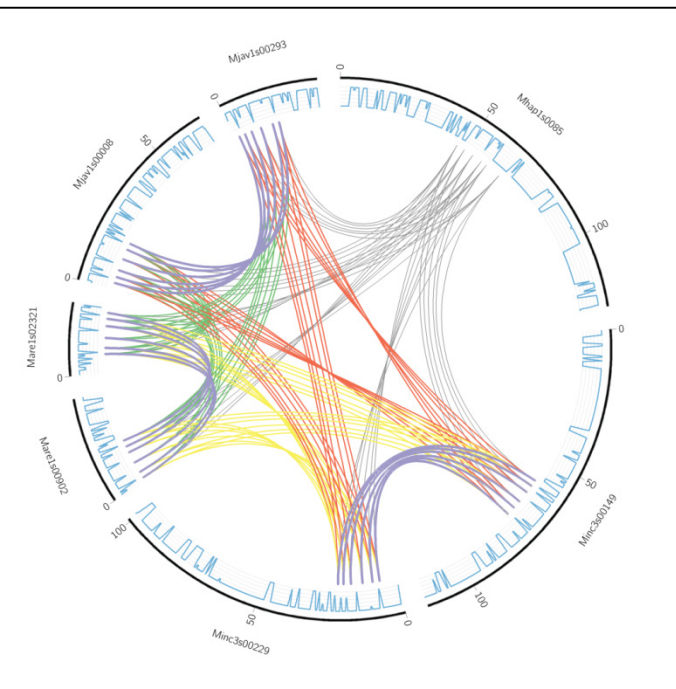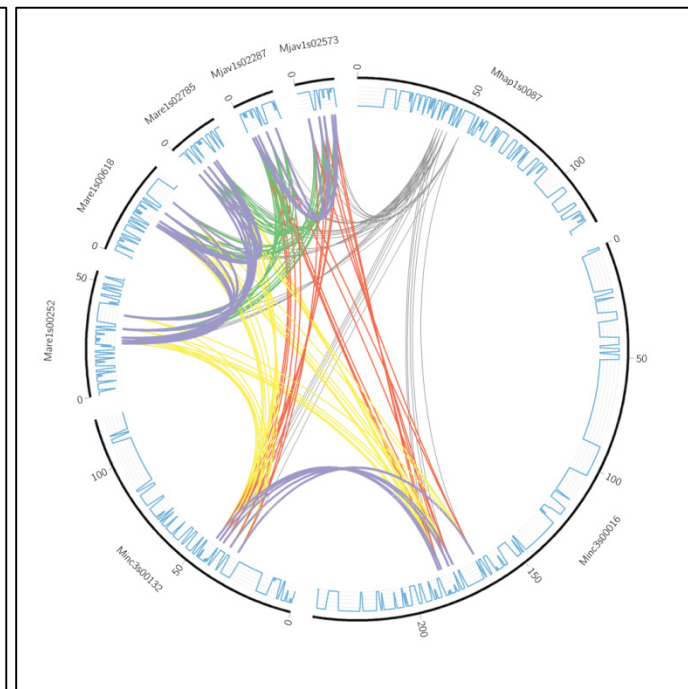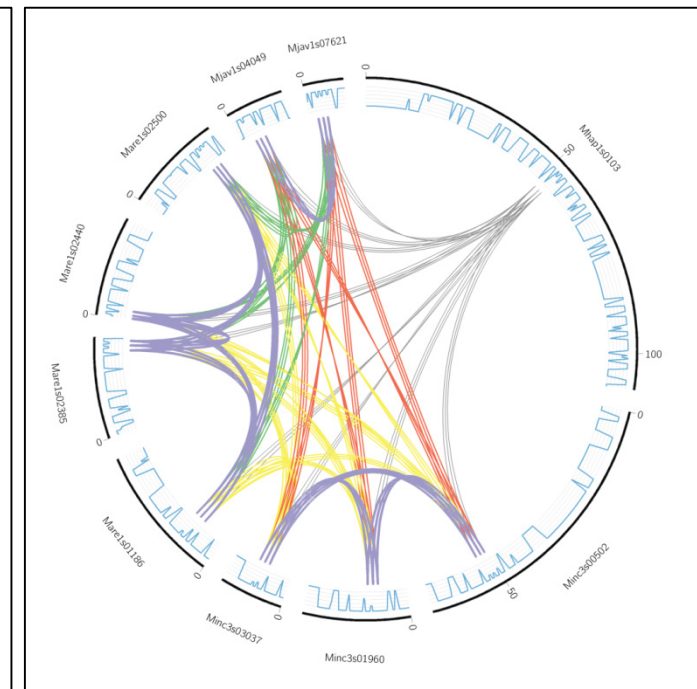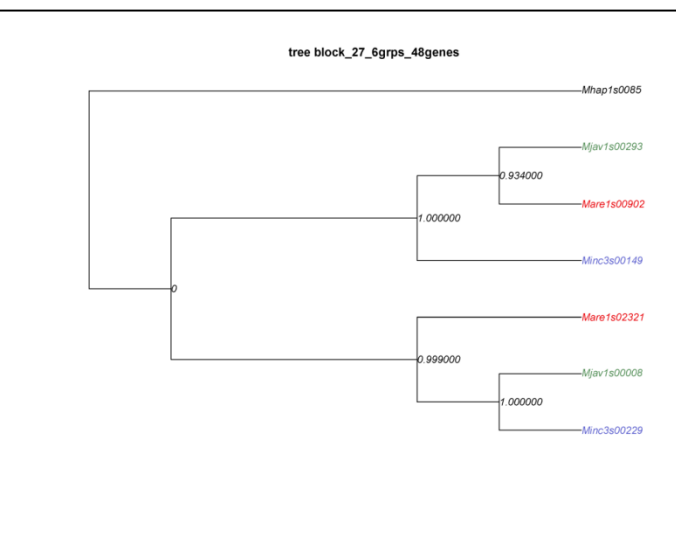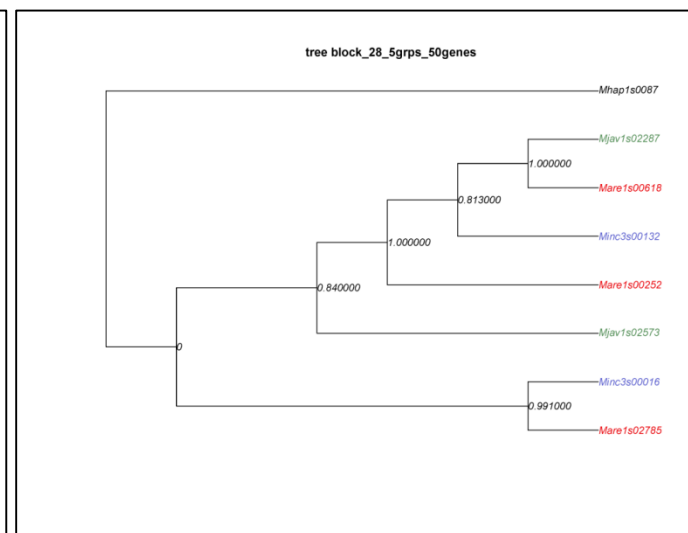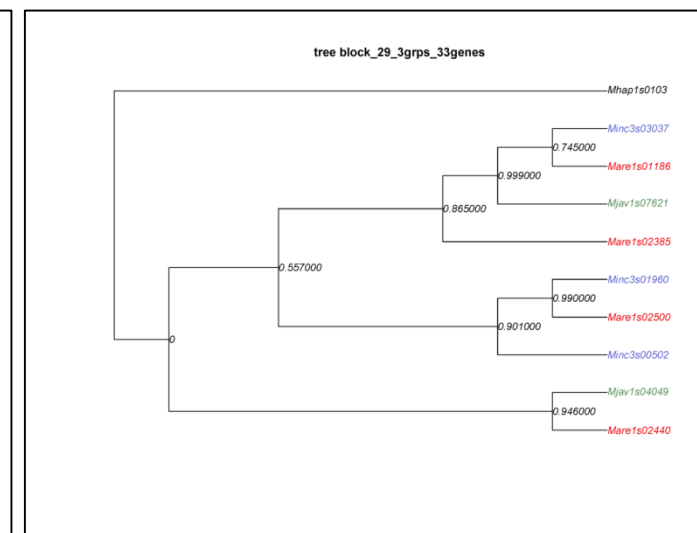

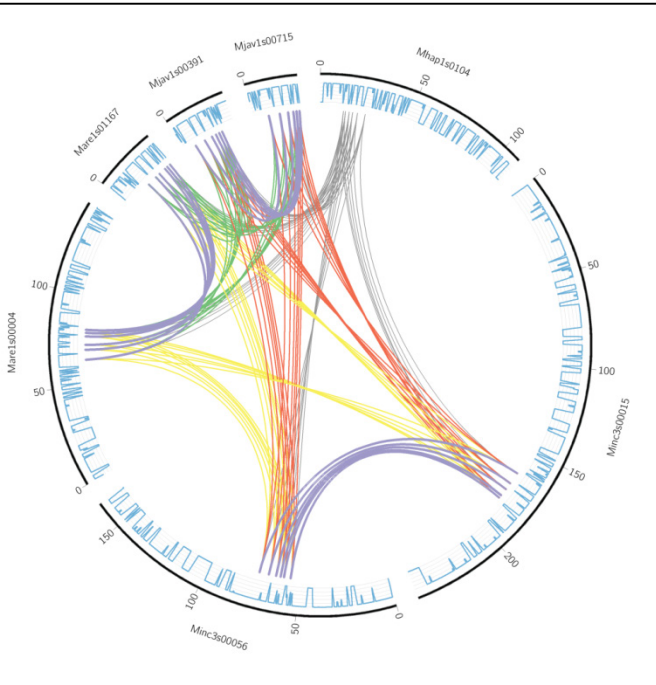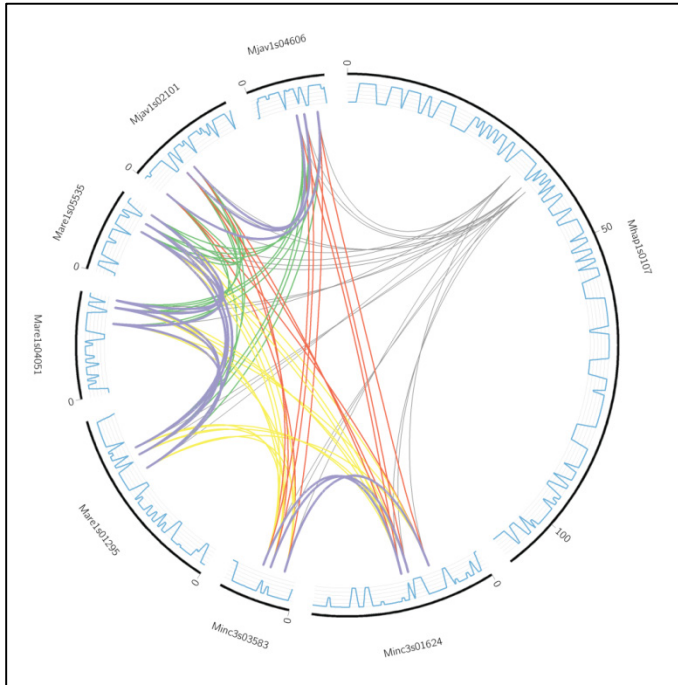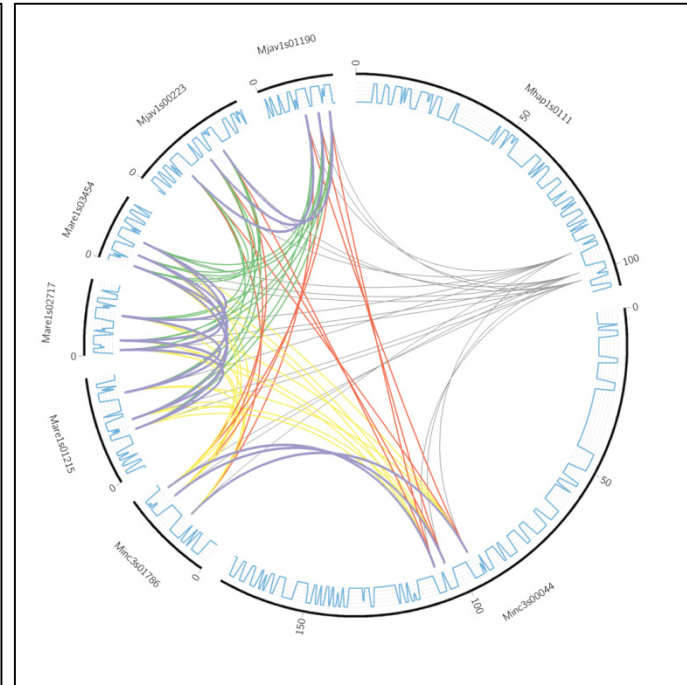

tree block\_30\_6grps\_48genes

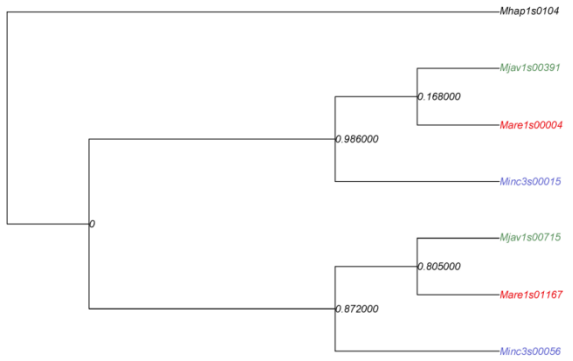

No tree

tree block\_32\_3grps\_27genes

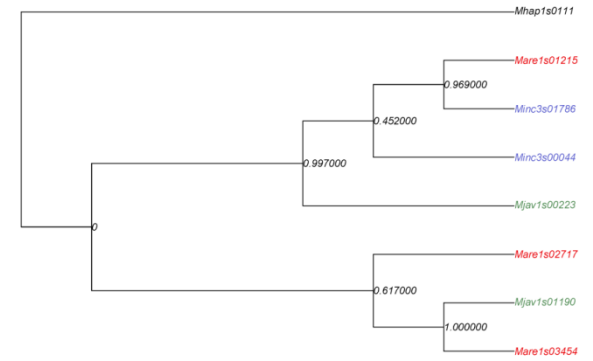



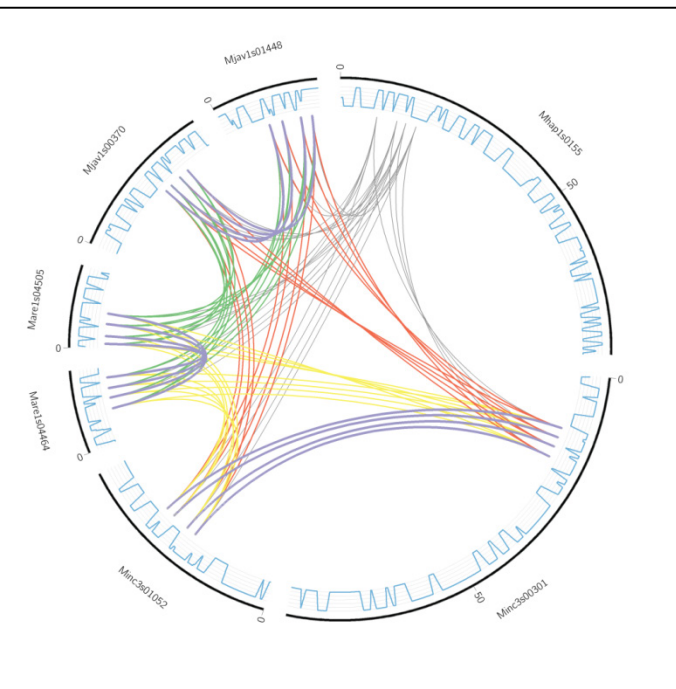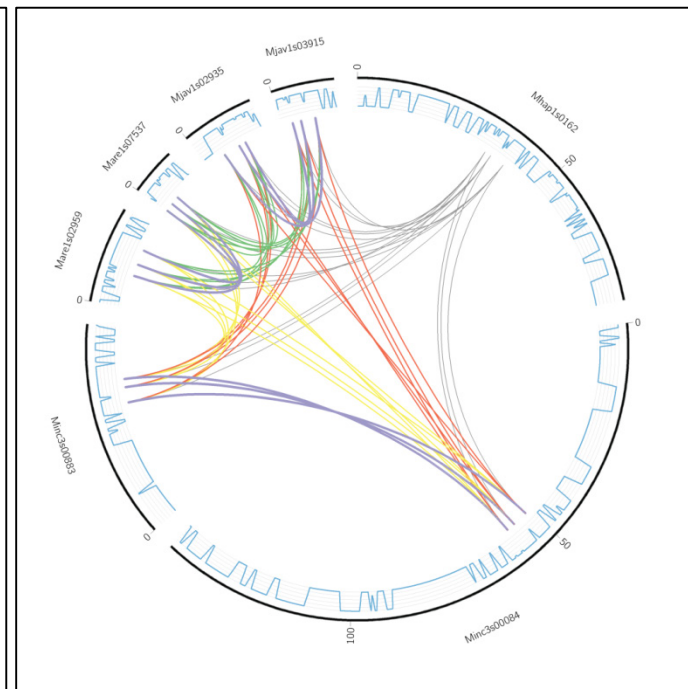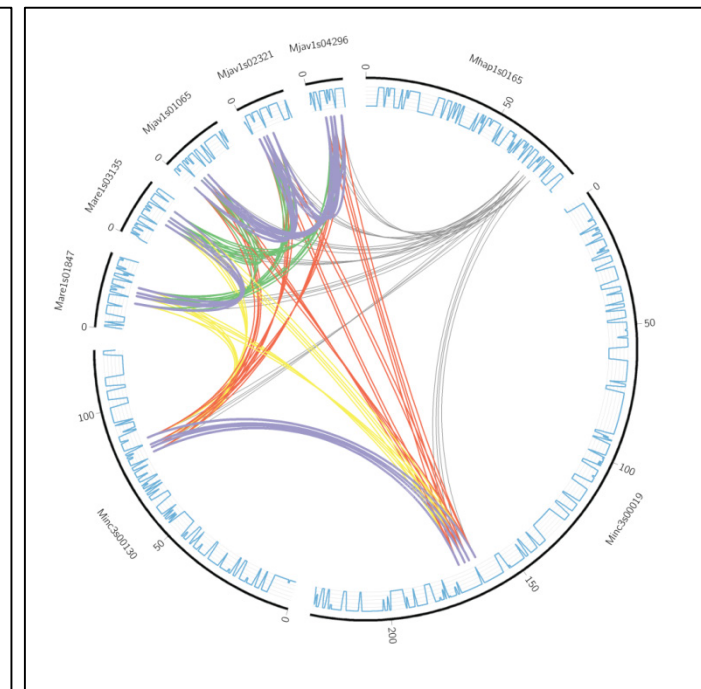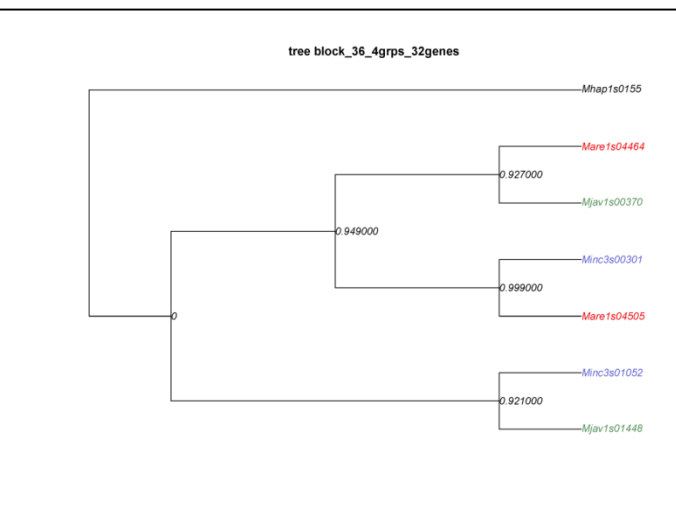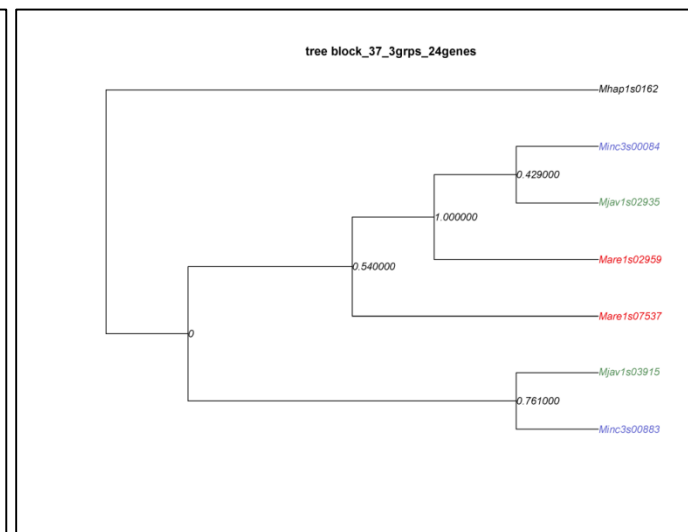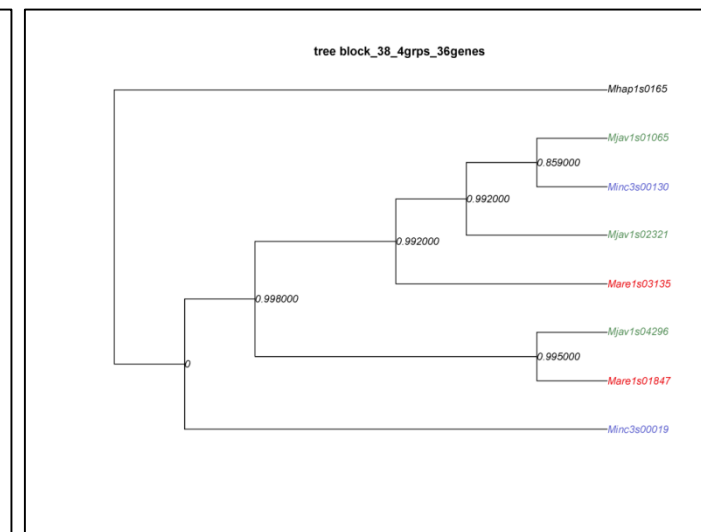

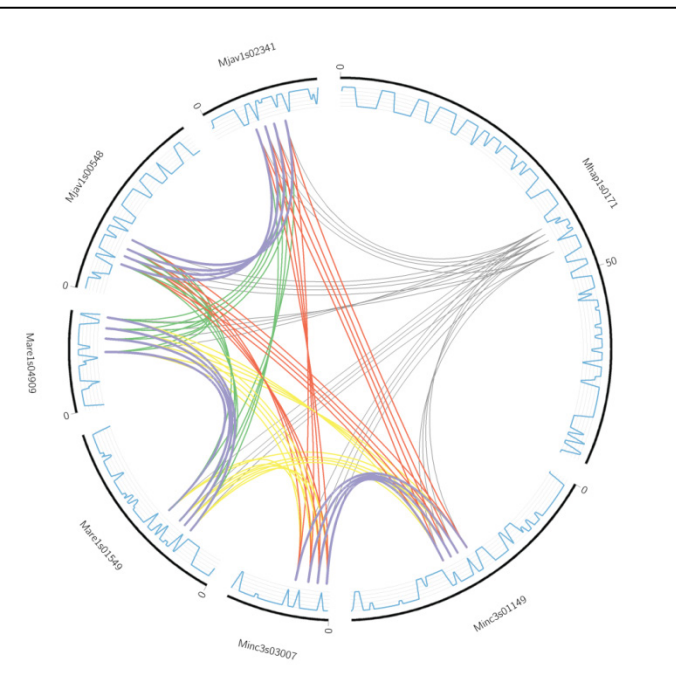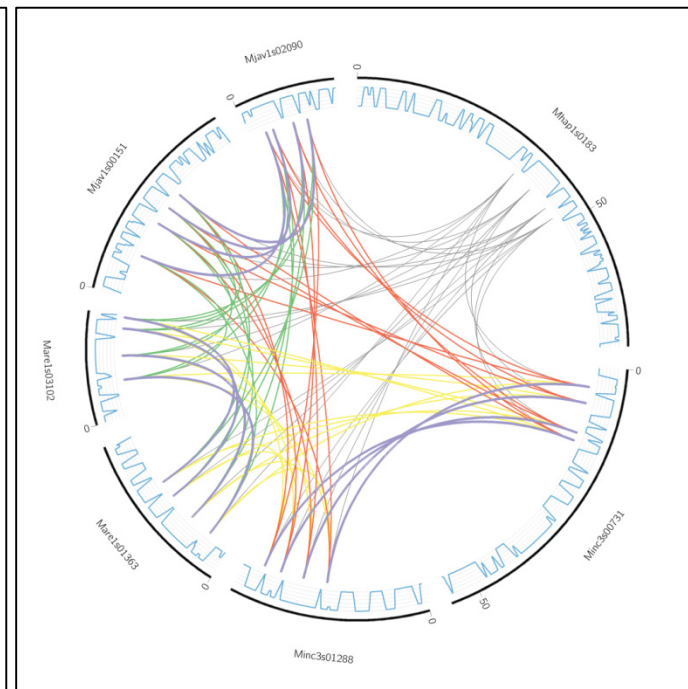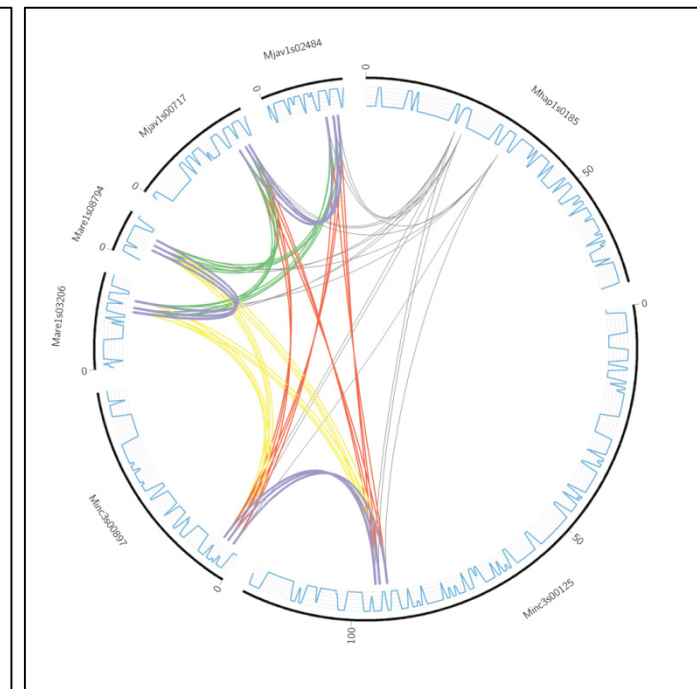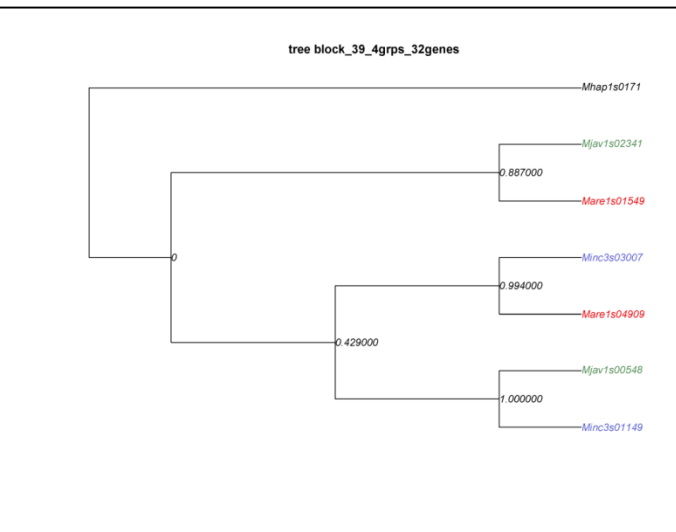

No tree

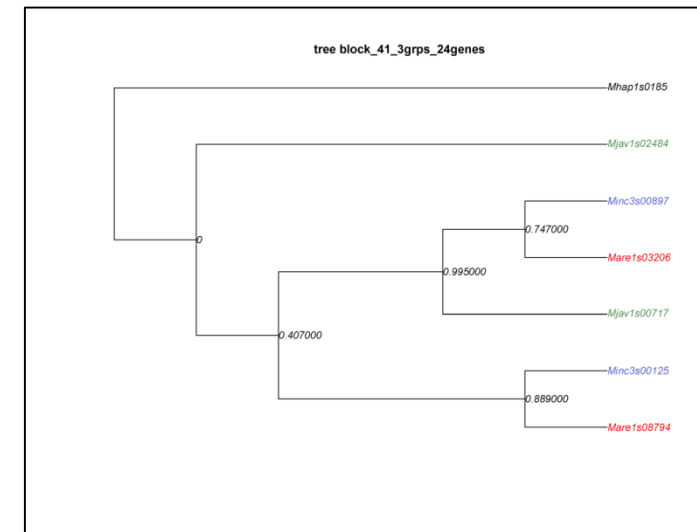

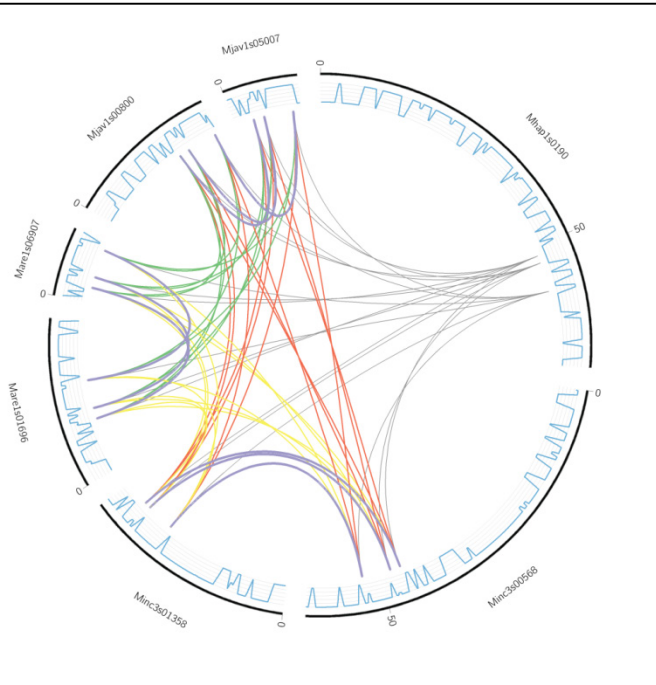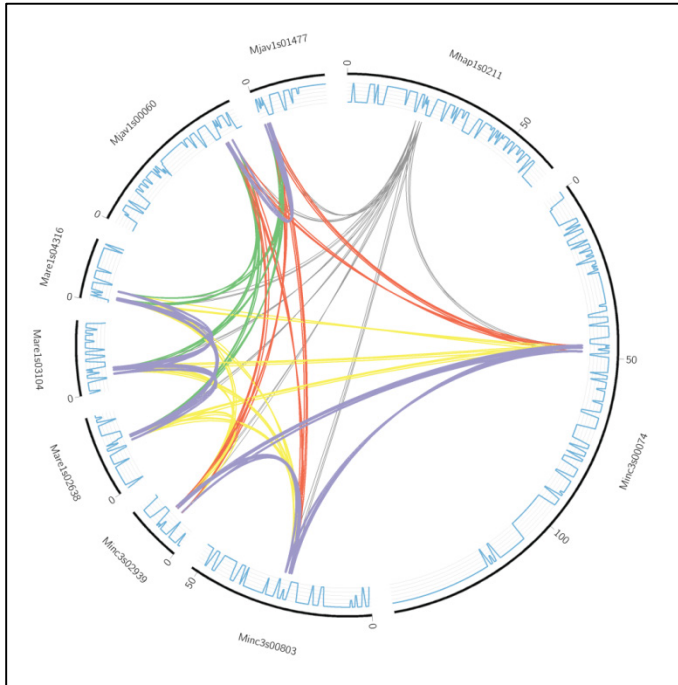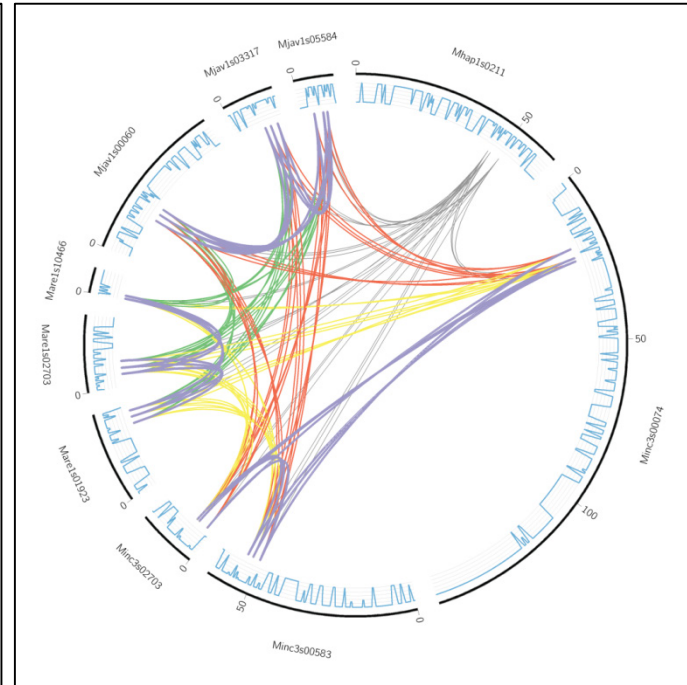

No tree

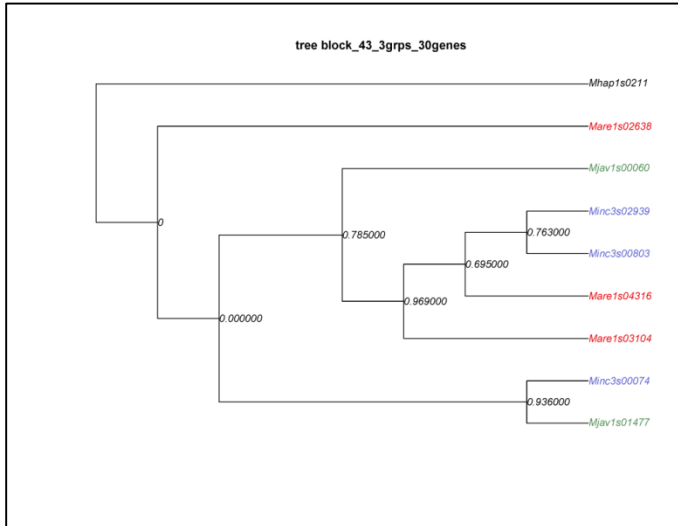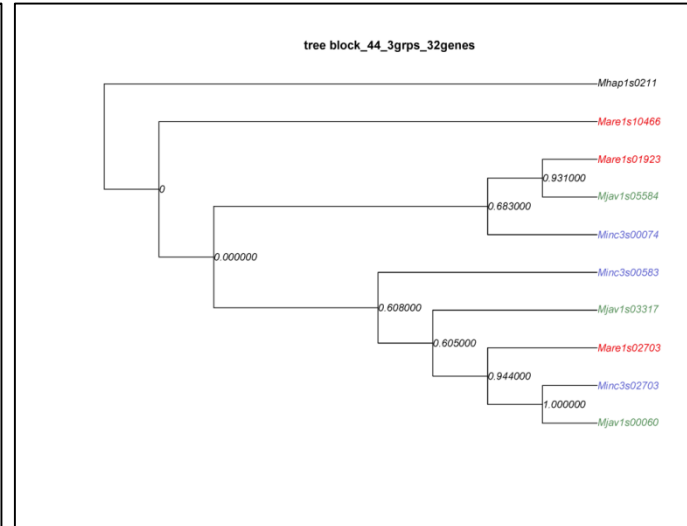

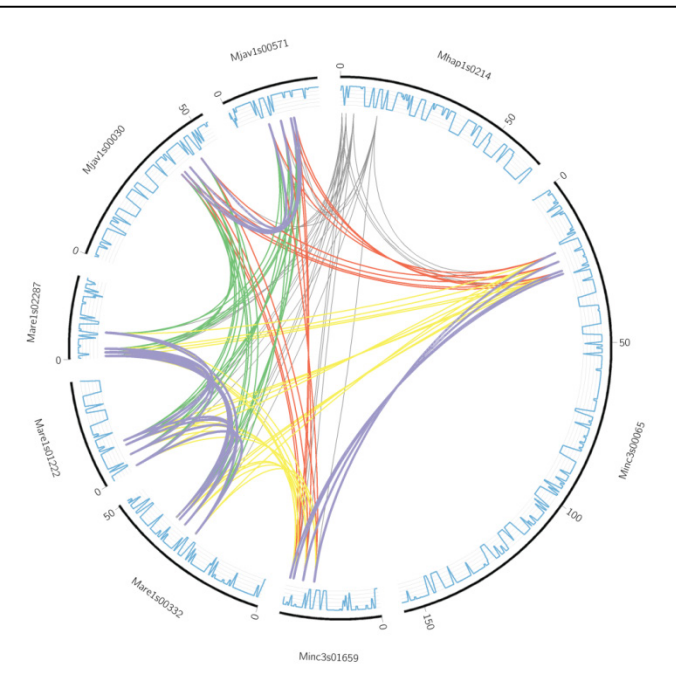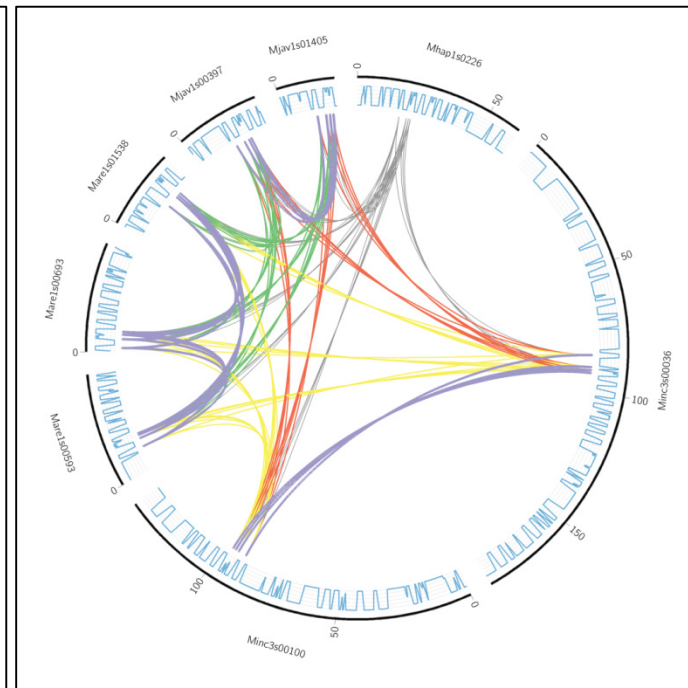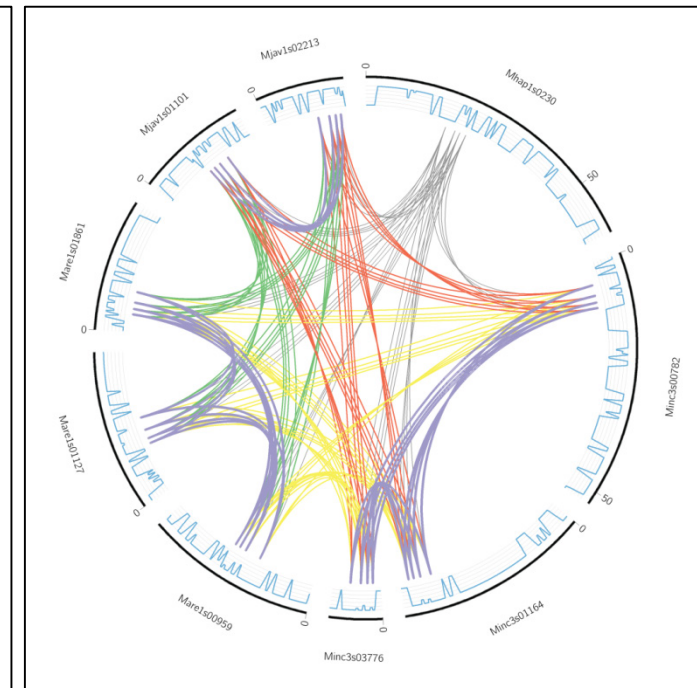

No tree

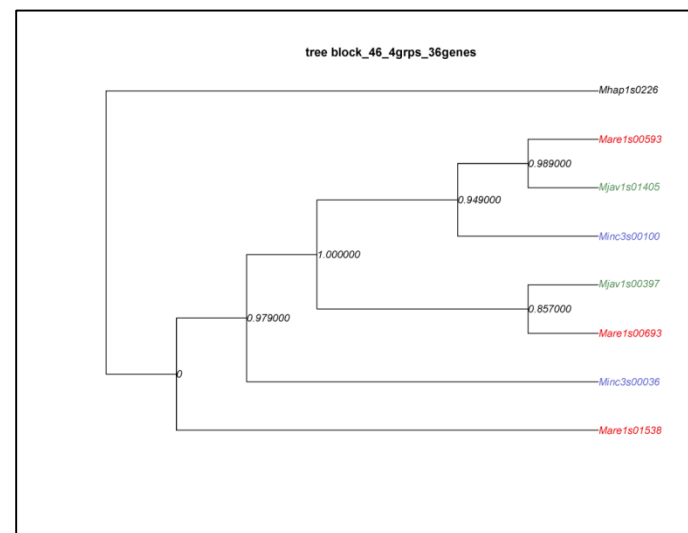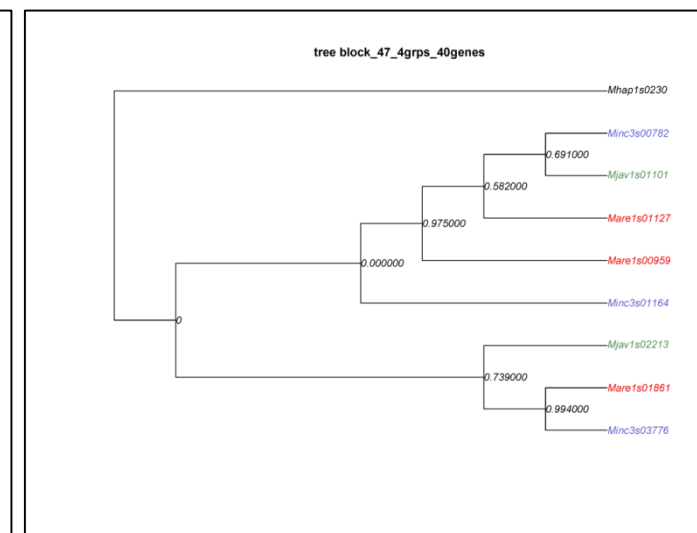



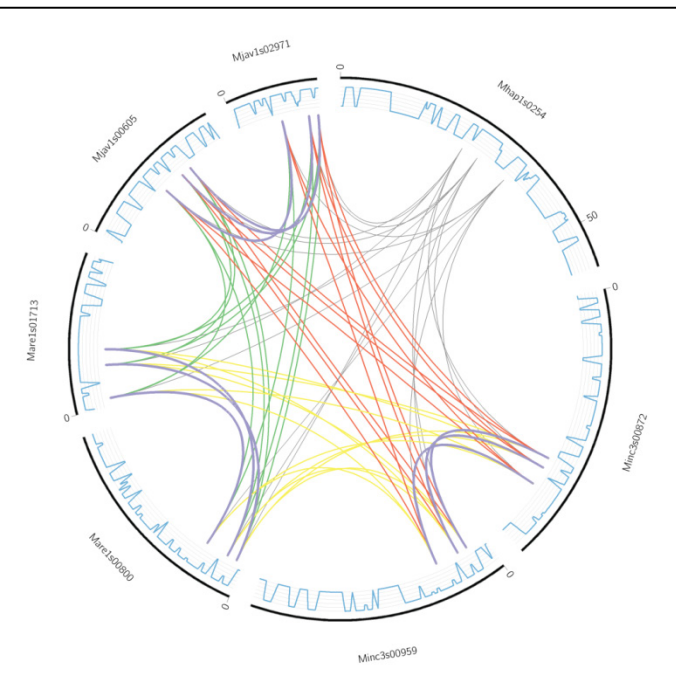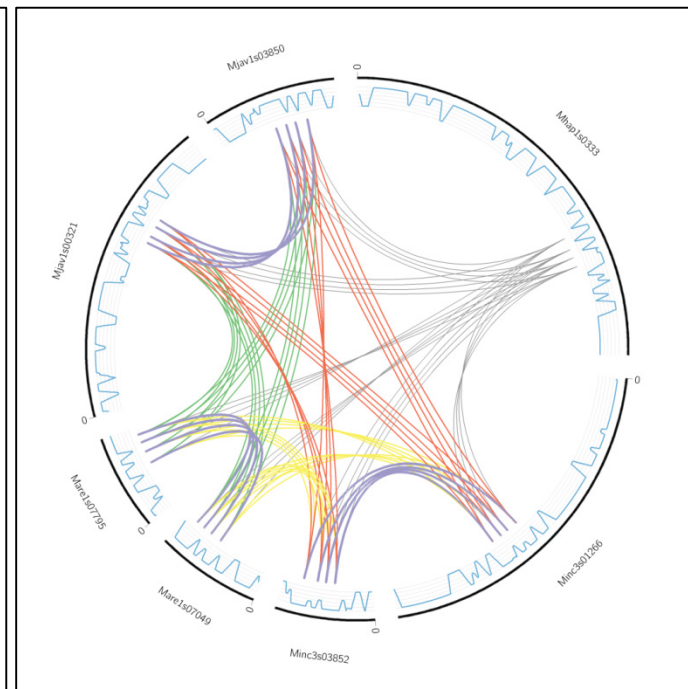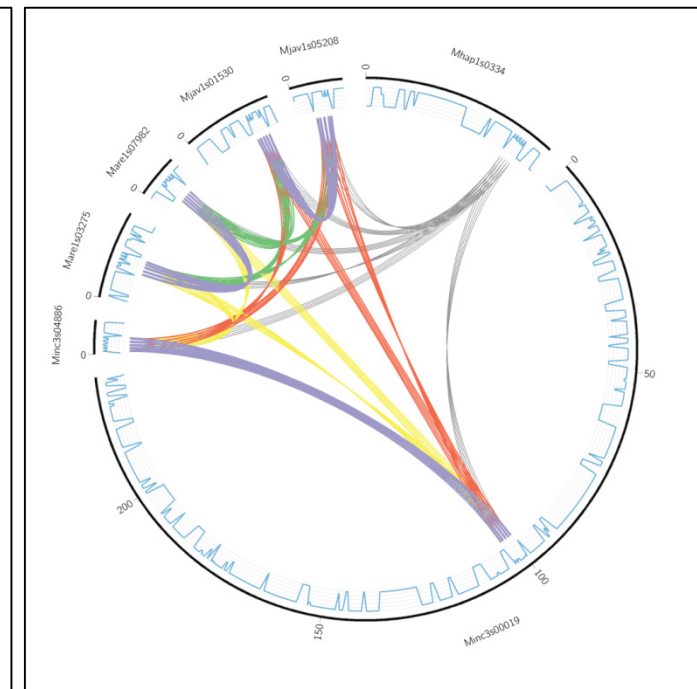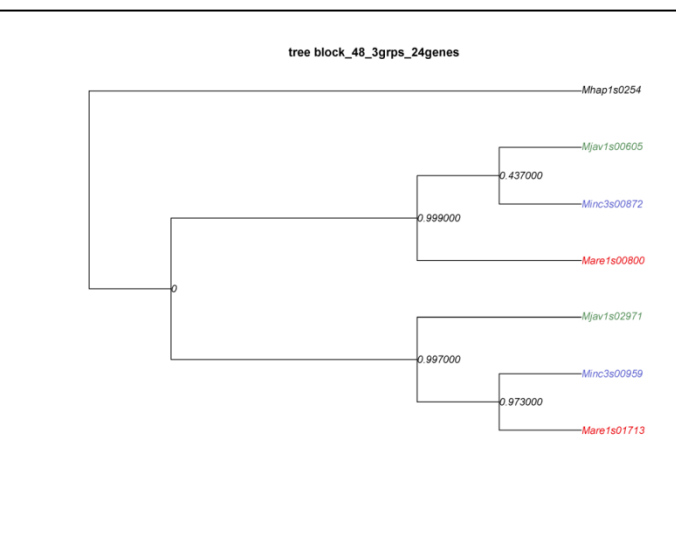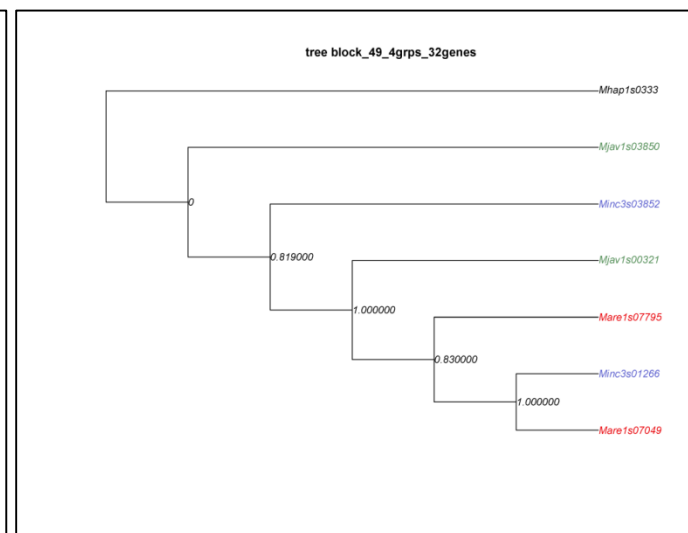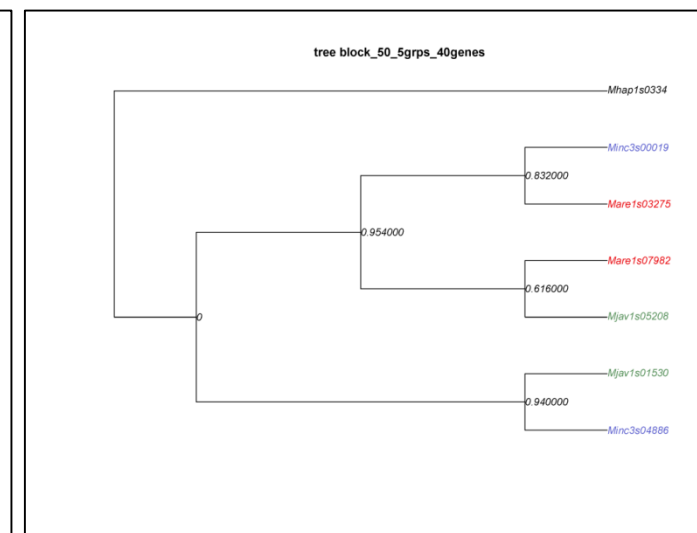

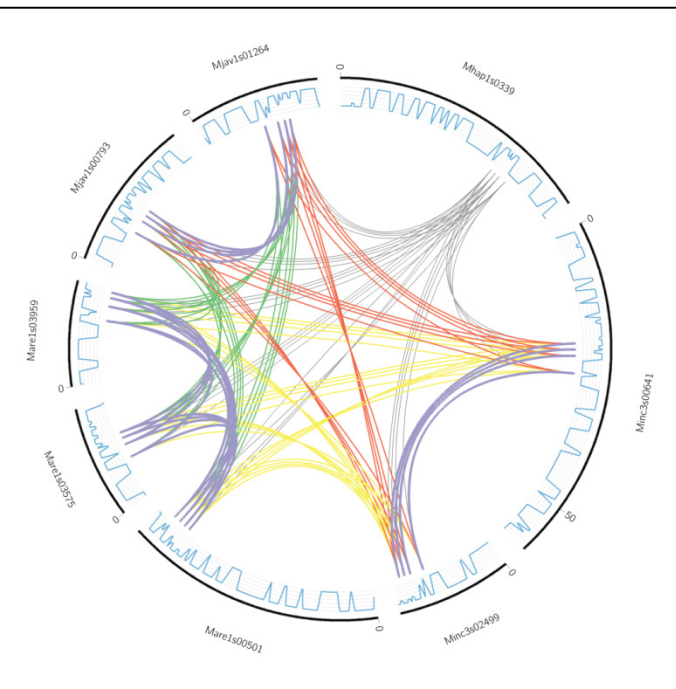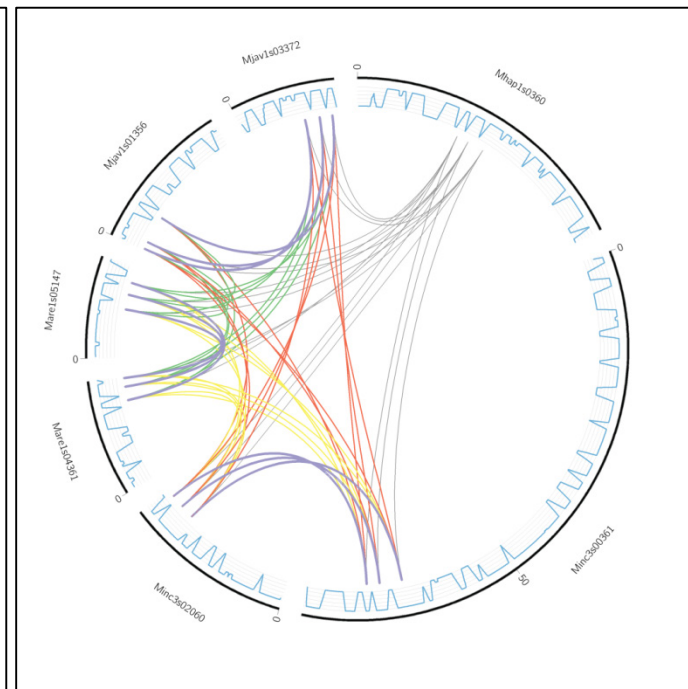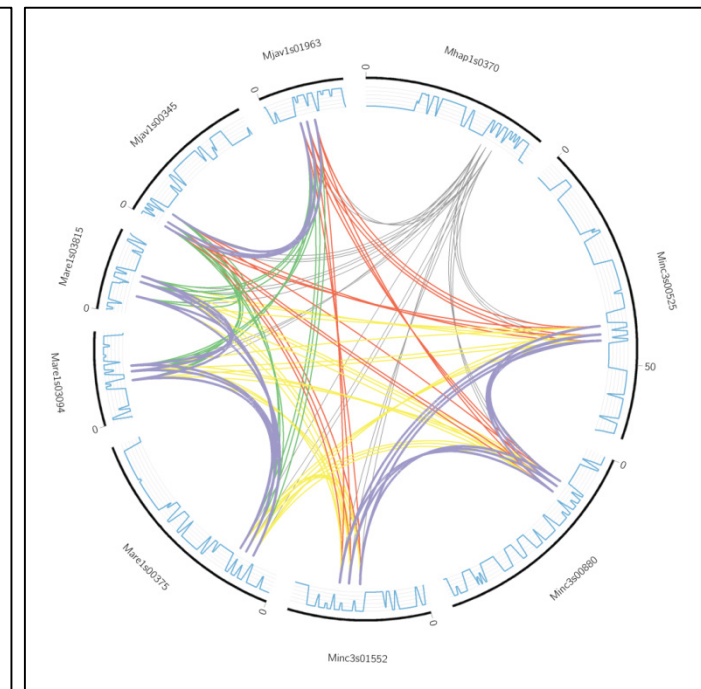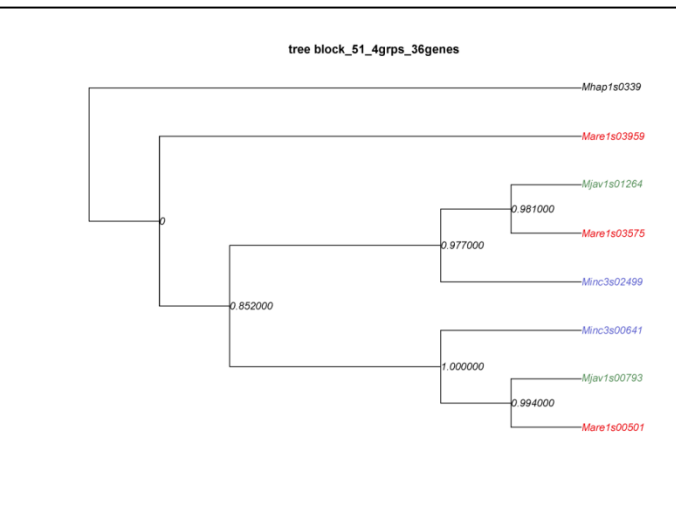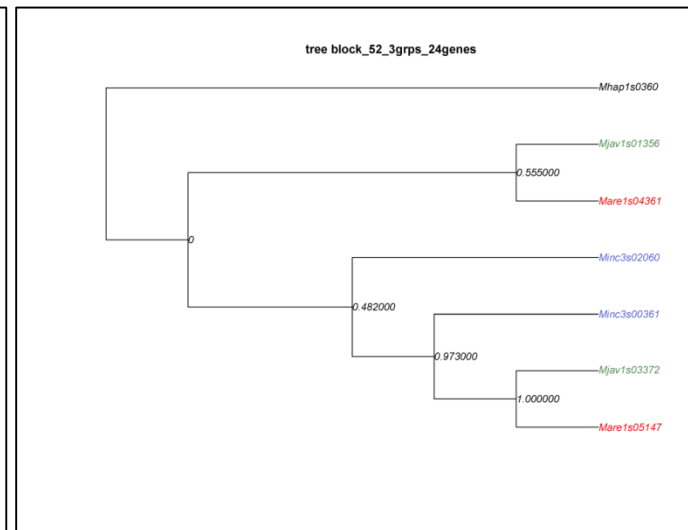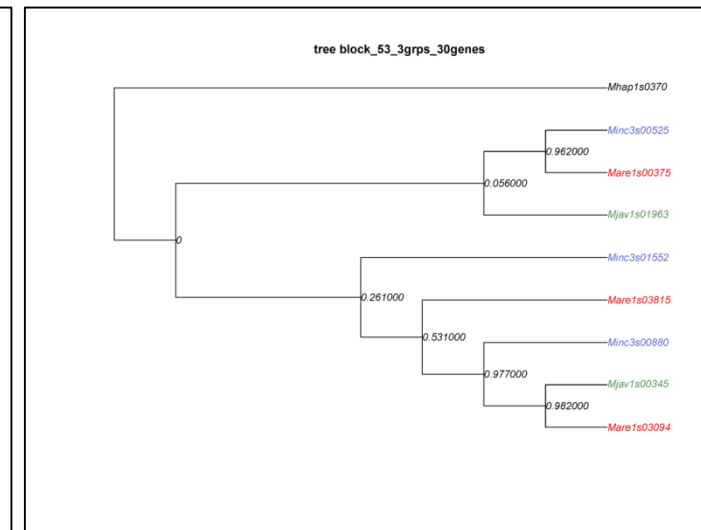

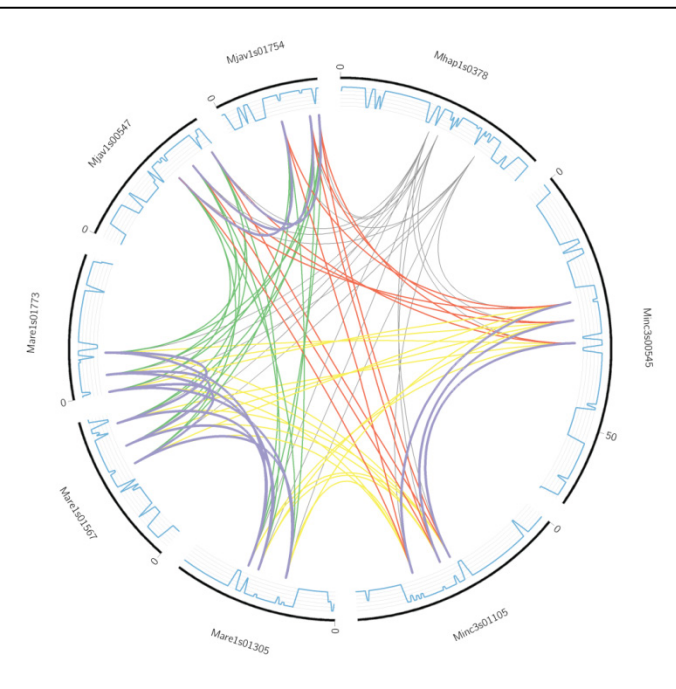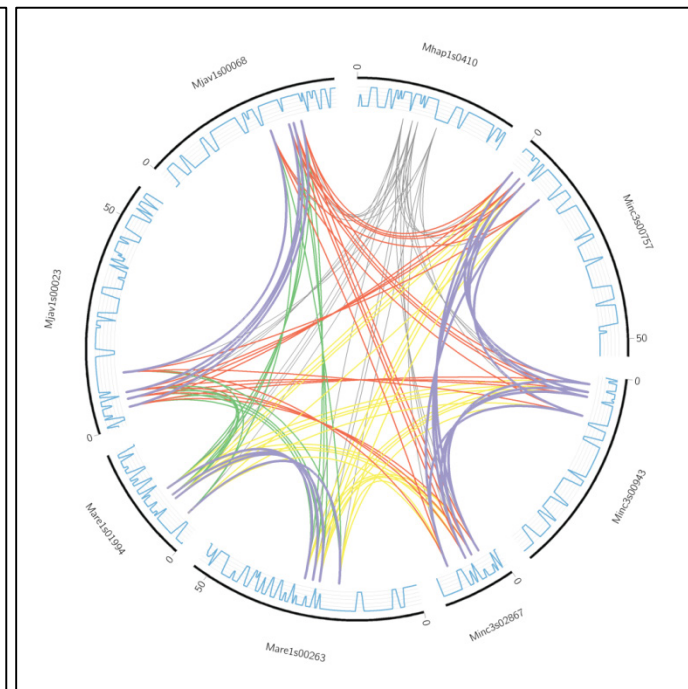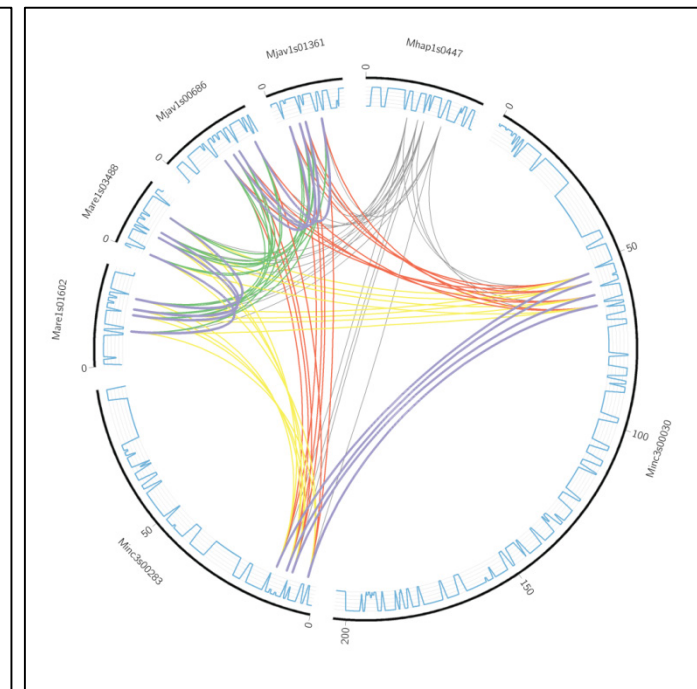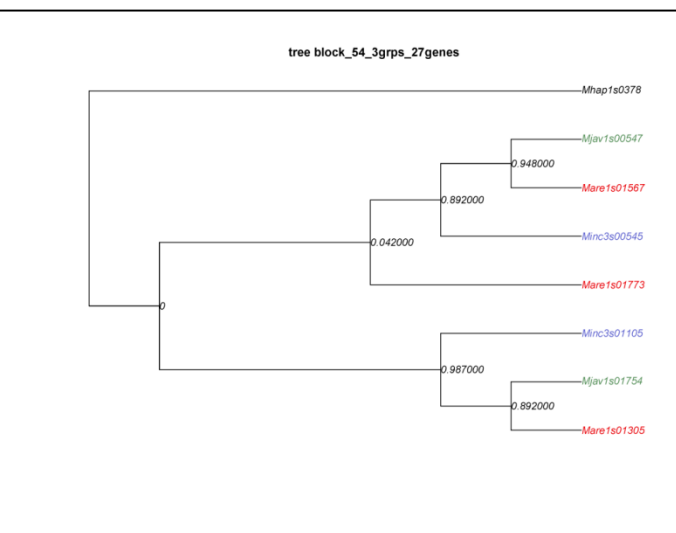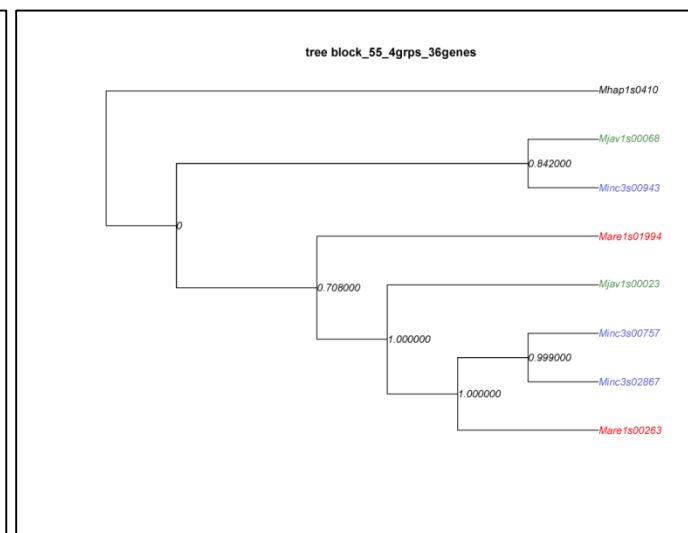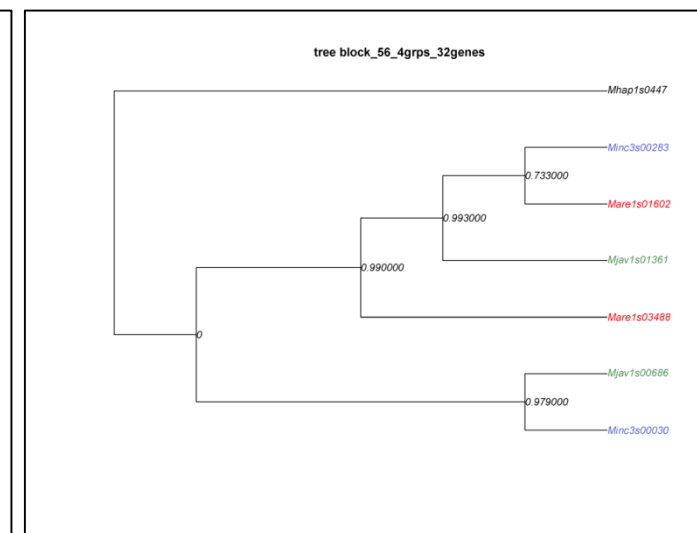

Supplement: pgen.1006777.s005.pdf [file pgen.1006777.s005.pdf]
