# Supplementary material for: Hybridization and polyploidy enable genomic plasticity without sex in the most devastating plant-parasitic nematodes
Source: PubMed Central journal article supplement (PMC5465968; doi:10.1371/journal.pgen.1006777), 2017-06-08

**sequence2 Minc3s00990:3627-27194**

Alignment 1  
sequence1  
Minc3s00001 (+)  
286600-315888  
Criteria: 70%, 100 bp  
Regions: 65

X-axis: sequence2  
Resolution: 8  
Window size: 100 bp

← contig  
→ gene  
■ exon  
■ UTR  
■ CNS  
■ mRNA

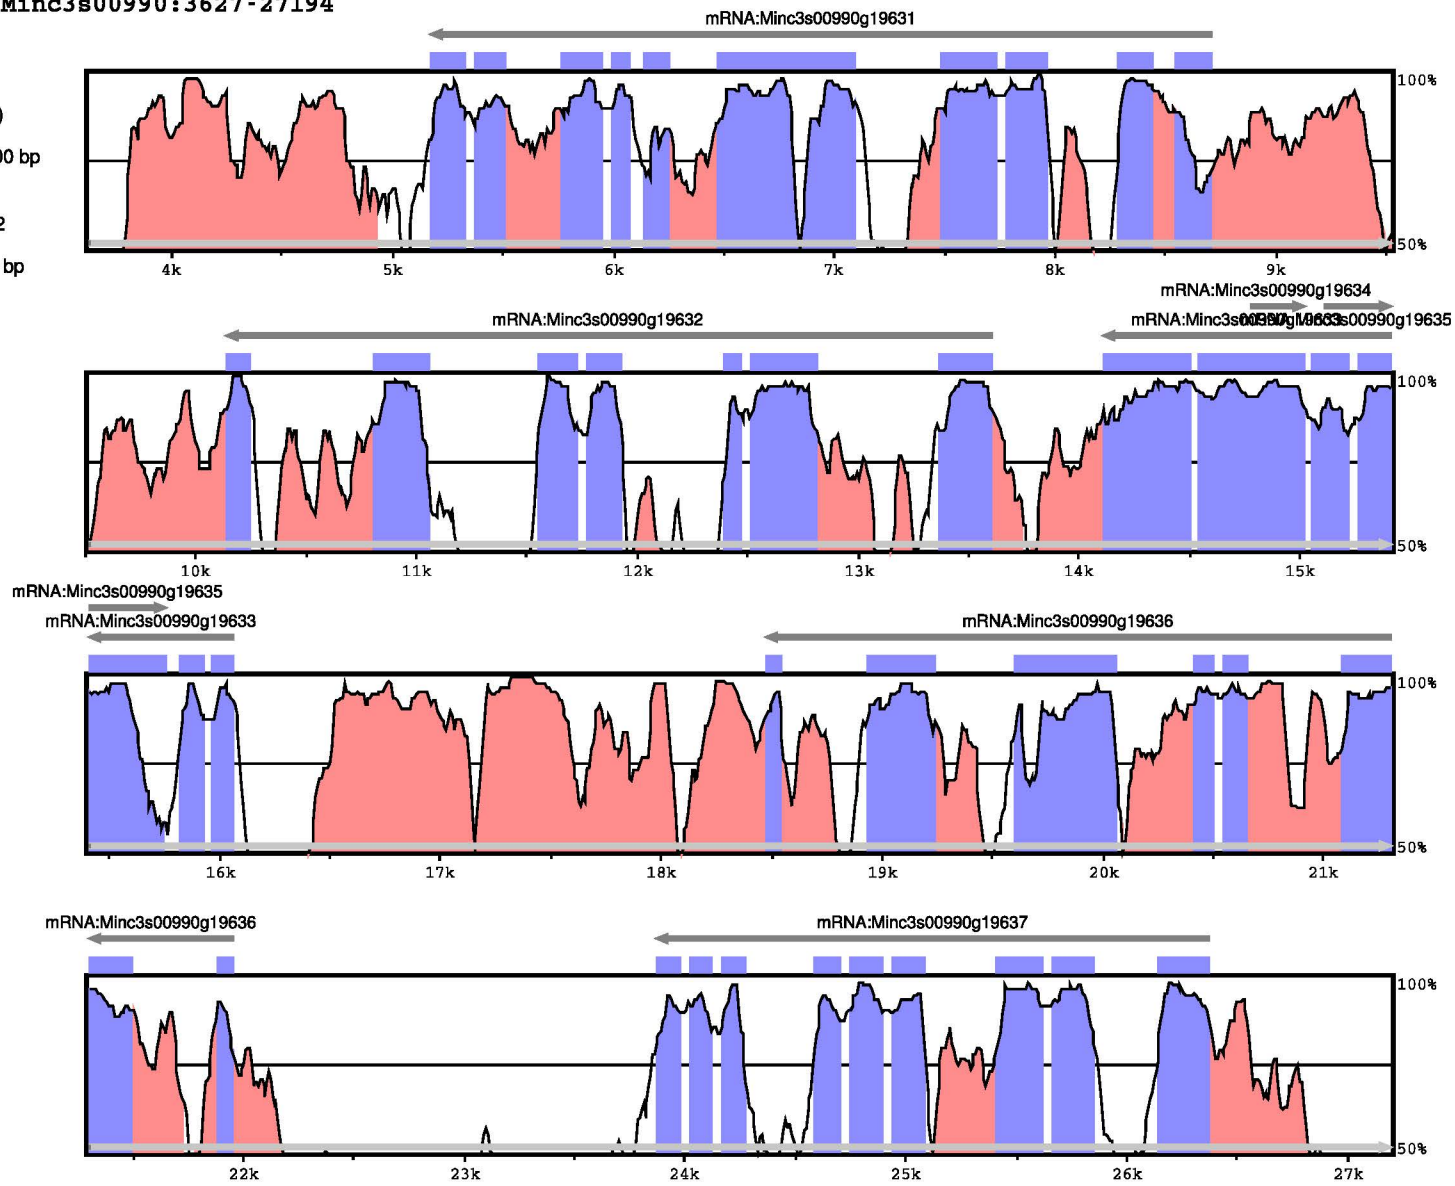

Supplement: pgen.1006777.s003.pdf [file pgen.1006777.s003.pdf]
