# Supplementary material for: Hybridization and polyploidy enable genomic plasticity without sex in the most devastating plant-parasitic nematodes
Source: PubMed Central journal article supplement (PMC5465968; doi:10.1371/journal.pgen.1006777), 2017-06-08

$\omega$  rate class

0.10

0.02

0.01

0

0.998

0.873

0.107

Minc3s00119g05130

Mjav1s00025g00060

Minc3s00043g02389

Mjav1s00402g005840

Mare1s02197g031032

Mhap1s0072g04803

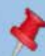

Supplement: pgen.1006777.s007.pdf [file pgen.1006777.s007.pdf]
