# Supplementary material for: Hybridization and polyploidy enable genomic plasticity without sex in the most devastating plant-parasitic nematodes
Source: PubMed Central journal article supplement (PMC5465968; doi:10.1371/journal.pgen.1006777), 2017-06-08

**A**

Nuclei number

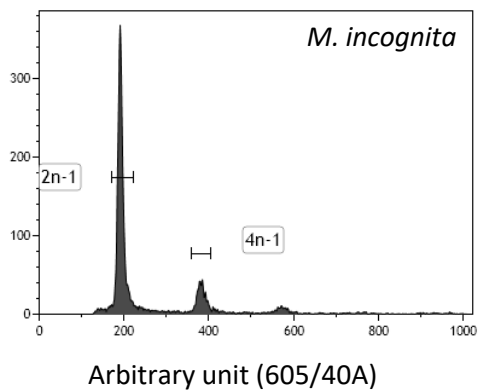**B**

Nuclei number

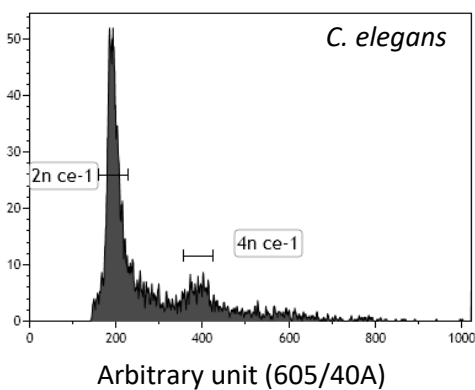**C**

Nuclei number

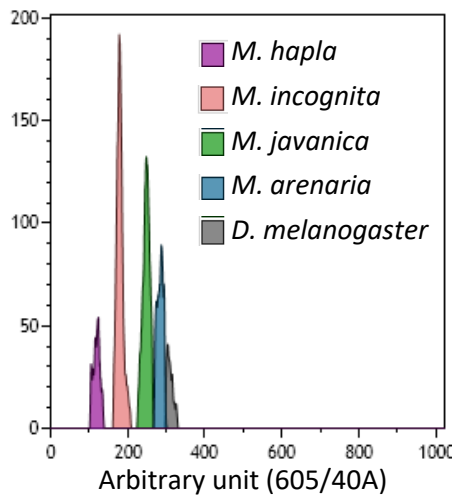

Supplement: pgen.1006777.s008.pdf [file pgen.1006777.s008.pdf]
