# Supplementary material for: Hybridization and polyploidy enable genomic plasticity without sex in the most devastating plant-parasitic nematodes
Source: PubMed Central journal article supplement (PMC5465968; doi:10.1371/journal.pgen.1006777), 2017-06-08
Supplement: pgen.1006777.s011.pdf [file pgen.1006777.s011.pdf]

**S1 Table: Source and accession numbers of mitochondrial sequences**

| <b>Species</b>                 | <b>Suffix</b> | <b>Source</b> | <b>Accession</b> |
|--------------------------------|---------------|---------------|------------------|
| <i>Meloidogyne incognita</i>   | D             | Genbank       | NC_024097        |
|                                | L             | EMBL ENA      | PRJEB8714        |
| <i>Meloidogyne javanica</i>    | D             | Genbank       | KP202352         |
|                                | L             | EMBL ENA      | PRJEB8714        |
| <i>Meloidogyne arenaria</i>    | D             | Genbank       | KP202350         |
|                                | L             | EMBL ENA      | PRJEB8714        |
| <i>Meloidogyne floridensis</i> | D             | Genbank       | CCDZ00000000.1   |
| <i>Meloidogyne enterolobii</i> | D             | Genbank       | KP202351         |
| <i>Meloidogyne hapla</i>       | D             | Genbank       | ABLG00000000.1   |
| <i>Meloidogyne chitwoodi</i>   | D             | Genbank       | NC_024096        |
| <i>Meloidogyne graminicola</i> | D             | Genbank       | KJ139963         |
|                                | D'            | Genbank       | NC_024275        |
| <i>Pratylenchus vulnus</i>     | D             | Genbank       | NC_020434        |
