# Supplementary material for: Hybridization and polyploidy enable genomic plasticity without sex in the most devastating plant-parasitic nematodes
Source: PubMed Central journal article supplement (PMC5465968; doi:10.1371/journal.pgen.1006777), 2017-06-08
Supplement: pgen.1006777.s014.pdf [file pgen.1006777.s014.pdf]

**S4 Table**

| <b>Pfam - TE</b> | <b>Desc</b>     | <b>Long-desc</b>                                     | <b><i>M. inc</i></b> | <b><i>M. jav</i></b> | <b><i>M. are</i></b> | <b><i>M. hap</i></b> |
|------------------|-----------------|------------------------------------------------------|----------------------|----------------------|----------------------|----------------------|
| PF01359          | Transposase_1   | Transposase (partial DDE domain)                     | 1                    | 15                   | 13                   | 1                    |
| PF12762          | DDE_Tnp_IS1595  | ISXO2-like transposase domain                        | 10                   | 71                   | 109                  | 7                    |
| PF13518          | HTH_28          | Helix-turn-helix domain                              | 0                    | 2                    | 5                    | 0                    |
| PF13358          | DDE_3           | DDE superfamily endonuclease                         | 13                   | 61                   | 61                   | 0                    |
| PF14529          | Exo_endo_phos_2 | Endonuclease-reverse transcriptase                   | 33                   | 140                  | 160                  | 16                   |
| PF01527          | HTH_Tnp_1       | Transposase                                          | 0                    | 2                    | 2                    | 0                    |
| PF05380          | Peptidase_A17   | Pao retrotransposon peptidase                        | 71                   | 271                  | 285                  | 14                   |
| PF03732          | Retrotrans_gag  | Retrotransposon gag protein                          | 3                    | 9                    | 16                   | 3                    |
| PF00665          | rve             | Integrase core domain                                | 205                  | 599                  | 689                  | 59                   |
| PF00078          | RVT_1           | Reverse transcriptase (RNA-dependent DNA polymerase) | 205                  | 593                  | 669                  | 69                   |
| PF13975          | gag-asp_proteas | gag-polyprotein putative aspartyl protease           | 1                    | 3                    | 6                    | 0                    |
| PF02892          | zf-BED          | BED zinc finger                                      | 39                   | 85                   | 102                  | 25                   |
| PF03564          | DUF1759         | Protein of unknown function (DUF 1759)               | 205                  | 424                  | 465                  | 20                   |
| PF04937          | DUF659          | Protein of unknown function (DUF 659)                | 1                    | 5                    | 1                    | 0                    |
| PF00385          | Chromo          | Chromo (CHRromatin Organisation MOdifier) domain     | 88                   | 163                  | 191                  | 29                   |
| PF00098          | zf-CCHC         | Zinc knuckle                                         | 134                  | 242                  | 295                  | 42                   |
| PF05699          | Dimer_Tnp_hAT   | hAT family C-terminal dimerisation region            | 94                   | 135                  | 225                  | 24                   |
| PF01498          | HTH_Tnp_Tc3_2   | Transposase                                          | 4                    | 9                    | 8                    | 1                    |
| PF00692          | dUTPase         | dUTPase                                              | 4                    | 9                    | 7                    | 3                    |
| PF03184          | DDE_1           | DDE superfamily endonuclease                         | 19                   | 32                   | 37                   | 7                    |
| PF05485          | THAP            | THAP domain                                          | 3                    | 6                    | 6                    | 0                    |
| PF03221          | HTH_Tnp_Tc5     | Tc5 transposase DNA-binding domain                   | 27                   | 40                   | 46                   | 10                   |
| PF00077          | RVP             | Retroviral aspartyl protease                         | 38                   | 51                   | 66                   | 15                   |
| PF04218          | CENP-B_N        | CENP-B N-terminal DNA-binding domain                 | 10                   | 16                   | 15                   | 7                    |
| PF07572          | BCNT            | Bucentaur or craniofacial development                | 3                    | 5                    | 4                    | 1                    |
| PF00075          | RNase_H         | RNase H                                              | 5                    | 6                    | 7                    | 2                    |
| PF03276          | Gag_spuma       | Spumavirus gag protein                               | 0                    | 1                    | 0                    | 0                    |
| PF01393          | Chromo_shadow   | Chromo shadow domain                                 | 2                    | 3                    | 2                    | 0                    |
| <b>Total</b>     |                 |                                                      | <b>1218</b>          | <b>2998</b>          | <b>3492</b>          | <b>355</b>           |
