# Supplementary material for: Hybridization and polyploidy enable genomic plasticity without sex in the most devastating plant-parasitic nematodes
Source: PubMed Central journal article supplement (PMC5465968; doi:10.1371/journal.pgen.1006777), 2017-06-08
Supplement: pgen.1006777.s015.pdf [file pgen.1006777.s015.pdf]

**S5 Table. Statistics of genome assemblies.**

|                       | <i>Meloidogyne incognita</i> | <i>Meloidogyne arenaria</i> | <i>Meloidogyne javanica</i> |
|-----------------------|------------------------------|-----------------------------|-----------------------------|
| Assembly software     | Mira + Sspace                | Mira + Sspace               | Mira + Sspace               |
| # of contigs          | 13,148                       | 28,641                      | 33,008                      |
| Cumulative size (bp)  | 180,221,179                  | 256,294,081                 | 235,523,531                 |
| Contig N50 bp (L50)   | 32,388 (1,440)               | 14,448 (5,017)              | 9,986 (6,981)               |
| # of scaffolds        | 12,091                       | 26,196                      | 31,341                      |
| Cumulative size (bp)  | 183,531,997                  | 258,067,405                 | 235,798,407                 |
| Scaffold N50 bp (L50) | 38,588 (1,209)               | 16,462 (4,438)              | 10,388 (6,741)              |
| Number of N's         | 3,319,814 (1.8%)             | 1,803,958 (0.69%)           | 312,237 (0.13%)             |
| GC percent            | 29.75%                       | 29.97%                      | 29.96%                      |
| Accession Numbers     | PRJEB8714 (ERS1696677)       | PRJEB8714 (ERS671129)       | PRJEB8714 (ERS671128)       |
