# Supplementary material for: Hybridization and polyploidy enable genomic plasticity without sex in the most devastating plant-parasitic nematodes
Source: PLoS Genet. 2017 Jun 8;13(6):e1006777. doi: 10.1371/journal.pgen.1006777 (PMC5465968; doi:10.1371/journal.pgen.1006777)
Supplement: S2 Table — (XLSX) [file pgen.1006777.s012.xlsx]

## Sheet: Minc-GO
Class	GO	Description	# in KaKs		Class	GO	Description	# GO in copies	#copies with this GO	#GO in KaKs	#KaKs with this GO	raw_p_over	FDR_over
MF	GO:0000166	nucleotide binding	58		MF	GO:0043565	sequence-specific DNA binding	4511	91	312	20	2.43935e-06	0
MF	GO:0003676	nucleic acid binding	61		MF	GO:0046872	metal ion binding	4511	444	312	51	0.000133015	0.00352295
MF	GO:0003677	DNA binding	46		MF	GO:0046914	transition metal ion binding	4511	297	312	38	0.000115919	0.00368076
MF	GO:0003689	DNA clamp loader activity	2		MF	GO:0008270	zinc ion binding	4511	259	312	35	7.20112e-05	0.00391704
MF	GO:0003690	double-stranded DNA binding	1		MF	GO:0043169	cation binding	4511	448	312	51	0.00016755	0.00445551
MF	GO:0003700	transcription factor activity, sequence-specific DNA binding	18		MF	GO:0003677	DNA binding	4511	398	312	46	0.000256828	0.00639347
MF	GO:0003707	steroid hormone receptor activity	4		MF	GO:0001071	nucleic acid binding transcription factor activity	4511	114	312	18	0.000712797	0.0133526
MF	GO:0003723	RNA binding	4		MF	GO:0003700	transcription factor activity, sequence-specific DNA binding	4511	114	312	18	0.000712797	0.0133526
MF	GO:0003735	structural constituent of ribosome	4		MF	GO:0030246	carbohydrate binding	4511	19	312	6	0.00130909	0.0323743
MF	GO:0003755	peptidyl-prolyl cis-trans isomerase activity	2
MF	GO:0003774	motor activity	1		Class	GO	Description	# GO in copies	#copies with this GO	#GO in KaKs	#KaKs with this GO	raw_p_over	FDR_over
MF	GO:0003824	catalytic activity	126		BP	GO:0009894	regulation of catabolic process	3096	4	205	4	1.87012e-05	0.00227817
MF	GO:0003887	DNA-directed DNA polymerase activity	5		BP	GO:0031329	regulation of cellular catabolic process	3096	4	205	4	1.87012e-05	0.00227817
MF	GO:0003910	DNA ligase (ATP) activity	1		BP	GO:0000070	mitotic sister chromatid segregation	3096	3	205	3	0.000286351	0.00234229
MF	GO:0003917	DNA topoisomerase type I activity	1		BP	GO:0000819	sister chromatid segregation	3096	3	205	3	0.000286351	0.00234229
MF	GO:0003918	DNA topoisomerase type II (ATP-hydrolyzing) activity	2		BP	GO:0007059	chromosome segregation	3096	3	205	3	0.000286351	0.00234229
MF	GO:0003924	GTPase activity	1		BP	GO:0007088	regulation of mitotic nuclear division	3096	3	205	3	0.000286351	0.00234229
MF	GO:0003995	acyl-CoA dehydrogenase activity	3		BP	GO:0007091	metaphase/anaphase transition of mitotic cell cycle	3096	3	205	3	0.000286351	0.00234229
MF	GO:0004057	arginyltransferase activity	2		BP	GO:0007346	regulation of mitotic cell cycle	3096	3	205	3	0.000286351	0.00234229
MF	GO:0004114	3',5'-cyclic-nucleotide phosphodiesterase activity	1		BP	GO:0010498	proteasomal protein catabolic process	3096	3	205	3	0.000286351	0.00234229
MF	GO:0004176	ATP-dependent peptidase activity	2		BP	GO:0010564	regulation of cell cycle process	3096	3	205	3	0.000286351	0.00234229
MF	GO:0004177	aminopeptidase activity	4		BP	GO:0010965	regulation of mitotic sister chromatid separation	3096	3	205	3	0.000286351	0.00234229
MF	GO:0004185	serine-type carboxypeptidase activity	1		BP	GO:0030071	regulation of mitotic metaphase/anaphase transition	3096	3	205	3	0.000286351	0.00234229
MF	GO:0004190	aspartic-type endopeptidase activity	2		BP	GO:0030162	regulation of proteolysis	3096	3	205	3	0.000286351	0.00234229
MF	GO:0004197	cysteine-type endopeptidase activity	1		BP	GO:0031145	anaphase-promoting complex-dependent proteasomal ubiquitin-dependent protein catabolic process	3096	3	205	3	0.000286351	0.00234229
MF	GO:0004222	metalloendopeptidase activity	11		BP	GO:0032434	regulation of proteasomal ubiquitin-dependent protein catabolic process	3096	3	205	3	0.000286351	0.00234229
MF	GO:0004252	serine-type endopeptidase activity	3		BP	GO:0033044	regulation of chromosome organization	3096	3	205	3	0.000286351	0.00234229
MF	GO:0004357	glutamate-cysteine ligase activity	1		BP	GO:0033045	regulation of sister chromatid segregation	3096	3	205	3	0.000286351	0.00234229
MF	GO:0004518	nuclease activity	10		BP	GO:0033047	regulation of mitotic sister chromatid segregation	3096	3	205	3	0.000286351	0.00234229
MF	GO:0004519	endonuclease activity	1		BP	GO:0042176	regulation of protein catabolic process	3096	3	205	3	0.000286351	0.00234229
MF	GO:0004652	polynucleotide adenylyltransferase activity	1		BP	GO:0043161	proteasome-mediated ubiquitin-dependent protein catabolic process	3096	3	205	3	0.000286351	0.00234229
MF	GO:0004672	protein kinase activity	13		BP	GO:0044770	cell cycle phase transition	3096	3	205	3	0.000286351	0.00234229
MF	GO:0004674	protein serine/threonine kinase activity	1		BP	GO:0044772	mitotic cell cycle phase transition	3096	3	205	3	0.000286351	0.00234229
MF	GO:0004725	protein tyrosine phosphatase activity	2		BP	GO:0044784	metaphase/anaphase transition of cell cycle	3096	3	205	3	0.000286351	0.00234229
MF	GO:0004867	serine-type endopeptidase inhibitor activity	3		BP	GO:0051302	regulation of cell division	3096	3	205	3	0.000286351	0.00234229
MF	GO:0004871	signal transducer activity	12		BP	GO:0051304	chromosome separation	3096	3	205	3	0.000286351	0.00234229
MF	GO:0004930	G-protein coupled receptor activity	5		BP	GO:0051306	mitotic sister chromatid separation	3096	3	205	3	0.000286351	0.00234229
MF	GO:0005085	guanyl-nucleotide exchange factor activity	4		BP	GO:0051783	regulation of nuclear division	3096	3	205	3	0.000286351	0.00234229
MF	GO:0005089	Rho guanyl-nucleotide exchange factor activity	3		BP	GO:0051983	regulation of chromosome segregation	3096	3	205	3	0.000286351	0.00234229
MF	GO:0005198	structural molecule activity	6		BP	GO:0061136	regulation of proteasomal protein catabolic process	3096	3	205	3	0.000286351	0.00234229
MF	GO:0005215	transporter activity	20		BP	GO:0098813	nuclear chromosome segregation	3096	3	205	3	0.000286351	0.00234229
MF	GO:0005216	ion channel activity	13		BP	GO:1901987	regulation of cell cycle phase transition	3096	3	205	3	0.000286351	0.00234229
MF	GO:0005230	extracellular ligand-gated ion channel activity	10		BP	GO:1901990	regulation of mitotic cell cycle phase transition	3096	3	205	3	0.000286351	0.00234229
MF	GO:0005272	sodium channel activity	1		BP	GO:1902099	regulation of metaphase/anaphase transition of cell cycle	3096	3	205	3	0.000286351	0.00234229
MF	GO:0005351	sugar:proton symporter activity	2		BP	GO:1903050	regulation of proteolysis involved in cellular protein catabolic process	3096	3	205	3	0.000286351	0.00234229
MF	GO:0005506	iron ion binding	2		BP	GO:1903362	regulation of cellular protein catabolic process	3096	3	205	3	0.000286351	0.00234229
MF	GO:0005509	calcium ion binding	2		BP	GO:0006508	proteolysis	3096	278	205	36	4.0768e-05	0.00309528
MF	GO:0005515	protein binding	60		BP	GO:0051276	chromosome organization	3096	34	205	9	0.000251259	0.0111347
MF	GO:0005524	ATP binding	32		BP	GO:0019222	regulation of metabolic process	3096	236	205	28	0.00136603	0.0119964
MF	GO:0005525	GTP binding	10		BP	GO:0031323	regulation of cellular metabolic process	3096	228	205	27	0.00172054	0.013731
MF	GO:0005544	calcium-dependent phospholipid binding	1		BP	GO:0051301	cell division	3096	5	205	3	0.00259028	0.0205681
MF	GO:0008061	chitin binding	1		BP	GO:0060255	regulation of macromolecule metabolic process	3096	225	205	26	0.00298389	0.0238896
MF	GO:0008080	N-acetyltransferase activity	3		BP	GO:0080090	regulation of primary metabolic process	3096	227	205	26	0.00337854	0.025036
MF	GO:0008081	phosphoric diester hydrolase activity	4
MF	GO:0008107	galactoside 2-alpha-L-fucosyltransferase activity	2		CC	None
MF	GO:0008146	sulfotransferase activity	2
MF	GO:0008158	hedgehog receptor activity	2
MF	GO:0008168	methyltransferase activity	1
MF	GO:0008234	cysteine-type peptidase activity	3
MF	GO:0008236	serine-type peptidase activity	6
MF	GO:0008270	zinc ion binding	35
MF	GO:0008289	lipid binding	3
MF	GO:0008312	7S RNA binding	2
MF	GO:0008375	acetylglucosaminyltransferase activity	2
MF	GO:0008408	3'-5' exonuclease activity	7
MF	GO:0015016	[heparan sulfate]-glucosamine N-sulfotransferase activity	1
MF	GO:0015078	hydrogen ion transmembrane transporter activity	2
MF	GO:0015171	amino acid transmembrane transporter activity	1
MF	GO:0016209	antioxidant activity	2
MF	GO:0016301	kinase activity	15
MF	GO:0016491	oxidoreductase activity	17
MF	GO:0016627	oxidoreductase activity, acting on the CH-CH group of donors	4
MF	GO:0016651	oxidoreductase activity, acting on NAD(P)H	1
MF	GO:0016705	oxidoreductase activity, acting on paired donors, with incorporation or reduction of molecular oxygen	2
MF	GO:0016758	transferase activity, transferring hexosyl groups	6
MF	GO:0016773	phosphotransferase activity, alcohol group as acceptor	14
MF	GO:0016779	nucleotidyltransferase activity	8
MF	GO:0016787	hydrolase activity	63
MF	GO:0016788	hydrolase activity, acting on ester bonds	17
MF	GO:0016813	hydrolase activity, acting on carbon-nitrogen (but not peptide) bonds, in linear amidines	1
MF	GO:0016817	hydrolase activity, acting on acid anhydrides	10
MF	GO:0016849	phosphorus-oxygen lyase activity	1
MF	GO:0016874	ligase activity	6
MF	GO:0016884	carbon-nitrogen ligase activity, with glutamine as amido-N-donor	2
MF	GO:0019001	guanyl nucleotide binding	11
MF	GO:0019211	phosphatase activator activity	2
MF	GO:0020037	heme binding	2
MF	GO:0022857	transmembrane transporter activity	19
MF	GO:0030145	manganese ion binding	1
MF	GO:0030170	pyridoxal phosphate binding	1
MF	GO:0030246	carbohydrate binding	6
MF	GO:0031683	G-protein beta/gamma-subunit complex binding	1
MF	GO:0036459	ubiquitinyl hydrolase activity	5
MF	GO:0043565	sequence-specific DNA binding	20
MF	GO:0046872	metal ion binding	51
MF	GO:0050660	flavin adenine dinucleotide binding	4
MF	GO:0051536	iron-sulfur cluster binding	2
MF	GO:0051539	4 iron, 4 sulfur cluster binding	1
MF	GO:0051920	peroxiredoxin activity	1
MF	GO:2001070	starch binding	2
BP	GO:0000042	protein targeting to Golgi	1
BP	GO:0000413	protein peptidyl-prolyl isomerization	2
BP	GO:0001522	pseudouridine synthesis	2
BP	GO:0003333	amino acid transmembrane transport	1
BP	GO:0005975	carbohydrate metabolic process	2
BP	GO:0006030	chitin metabolic process	1
BP	GO:0006139	nucleobase-containing compound metabolic process	45
BP	GO:0006260	DNA replication	8
BP	GO:0006265	DNA topological change	2
BP	GO:0006281	DNA repair	3
BP	GO:0006302	double-strand break repair	1
BP	GO:0006310	DNA recombination	1
BP	GO:0006338	chromatin remodeling	1
BP	GO:0006355	regulation of transcription, DNA-templated	23
BP	GO:0006397	mRNA processing	3
BP	GO:0006412	translation	4
BP	GO:0006457	protein folding	2
BP	GO:0006468	protein phosphorylation	13
BP	GO:0006470	protein dephosphorylation	2
BP	GO:0006506	GPI anchor biosynthetic process	2
BP	GO:0006508	proteolysis	36
BP	GO:0006511	ubiquitin-dependent protein catabolic process	10
BP	GO:0006614	SRP-dependent cotranslational protein targeting to membrane	2
BP	GO:0006629	lipid metabolic process	7
BP	GO:0006750	glutathione biosynthetic process	1
BP	GO:0006810	transport	39
BP	GO:0006811	ion transport	15
BP	GO:0006814	sodium ion transport	1
BP	GO:0006886	intracellular protein transport	5
BP	GO:0006904	vesicle docking involved in exocytosis	3
BP	GO:0007155	cell adhesion	2
BP	GO:0007165	signal transduction	20
BP	GO:0007186	G-protein coupled receptor signaling pathway	6
BP	GO:0007264	small GTPase mediated signal transduction	8
BP	GO:0008152	metabolic process	141
BP	GO:0008643	carbohydrate transport	2
BP	GO:0009058	biosynthetic process	43
BP	GO:0009190	cyclic nucleotide biosynthetic process	1
BP	GO:0009451	RNA modification	3
BP	GO:0010508	positive regulation of autophagy	1
BP	GO:0015991	ATP hydrolysis coupled proton transport	2
BP	GO:0016192	vesicle-mediated transport	4
BP	GO:0016598	protein arginylation	2
BP	GO:0030071	regulation of mitotic metaphase/anaphase transition	3
BP	GO:0032259	methylation	1
BP	GO:0035023	regulation of Rho protein signal transduction	3
BP	GO:0035556	intracellular signal transduction	9
BP	GO:0042254	ribosome biogenesis	2
BP	GO:0043087	regulation of GTPase activity	1
BP	GO:0043401	steroid hormone mediated signaling pathway	4
BP	GO:0043631	RNA polyadenylation	1
BP	GO:0045454	cell redox homeostasis	3
BP	GO:0051260	protein homooligomerization	2
BP	GO:0051276	chromosome organization	9
BP	GO:0055085	transmembrane transport	14
BP	GO:0055114	oxidation-reduction process	13
CC	GO:0000139	Golgi membrane	2
CC	GO:0000808	origin recognition complex	1
CC	GO:0005576	extracellular region	1
CC	GO:0005622	intracellular	45
CC	GO:0005634	nucleus	24
CC	GO:0005663	DNA replication factor C complex	2
CC	GO:0005680	anaphase-promoting complex	3
CC	GO:0005694	chromosome	7
CC	GO:0005737	cytoplasm	12
CC	GO:0005739	mitochondrion	1
CC	GO:0005840	ribosome	4
CC	GO:0005921	gap junction	4
CC	GO:0016020	membrane	61
CC	GO:0016021	integral component of membrane	28
CC	GO:0016459	myosin complex	1
CC	GO:0017119	Golgi transport complex	1
CC	GO:0031012	extracellular matrix	3
CC	GO:0032040	small-subunit processome	1
CC	GO:0033179	proton-transporting V-type ATPase, V0 domain	2
CC	GO:0048500	signal recognition particle	2
CC	GO:0090544	BAF-type complex	1

## Sheet: Minc-GOSLIM
Class	GO	Description	# in KaKs		Class	GO	Description	# GO in copies	#copies with this GO	#GO in KaKs	#KaKs with this GO	raw_p_over	FDR_over
MF	GO:0001071	nucleic acid binding transcription factor activity	18		MF	GO:0003677	DNA binding	4511	398	312	46	0.000256828	0.00604138
MF	GO:0003674	molecular_function	312		MF	GO:0001071	nucleic acid binding transcription factor activity	4511	114	312	18	0.000712797	0.00854631
MF	GO:0003677	DNA binding	46		MF	GO:0008233	peptidase activity	4511	254	312	31	0.00114604	0.0104192
MF	GO:0003723	RNA binding	4		MF	GO:0003676	nucleic acid binding	4511	523	312	50	0.00920553	0.0469808
MF	GO:0003735	structural constituent of ribosome	4		MF	GO:0097159	organic cyclic compound binding	4511	523	312	50	0.00920553	0.0469808
MF	GO:0003924	GTPase activity	1		MF	GO:1901363	heterocyclic compound binding	4511	523	312	50	0.00920553	0.0469808
MF	GO:0004518	nuclease activity	10
MF	GO:0004871	signal transducer activity	12
MF	GO:0005198	structural molecule activity	6		Class	GO	Description	# GO in copies	#copies with this GO	#GO in KaKs	#KaKs with this GO	raw_p_over	FDR_over
MF	GO:0008168	methyltransferase activity	1		BP	GO:0007059	chromosome segregation	3096	3	205	3	0.000286351	0.00736329
MF	GO:0008233	peptidase activity	31		BP	GO:0051276	chromosome organization	3096	34	205	9	0.000251259	0.00826308
MF	GO:0008289	lipid binding	3		BP	GO:0051301	cell division	3096	5	205	3	0.00259028	0.0357584
MF	GO:0016301	kinase activity	15
MF	GO:0016491	oxidoreductase activity	17
MF	GO:0016746	transferase activity, transferring acyl groups	5		Class	GO	Description	# GO in copies	#copies with this GO	#GO in KaKs	#KaKs with this GO	raw_p_over	FDR_over
MF	GO:0016757	transferase activity, transferring glycosyl groups	6		CC	None	None	NA	NA	NA	NA	NA	NA
MF	GO:0016779	nucleotidyltransferase activity	8
MF	GO:0016791	phosphatase activity	2
MF	GO:0016810	hydrolase activity, acting on carbon-nitrogen (but not peptide) bonds	1
MF	GO:0016829	lyase activity	1
MF	GO:0016853	isomerase activity	4
MF	GO:0016874	ligase activity	6
MF	GO:0016887	ATPase activity	6
MF	GO:0022857	transmembrane transporter activity	19
MF	GO:0030234	enzyme regulator activity	5
MF	GO:0043167	ion binding	98
BP	GO:0005975	carbohydrate metabolic process	2
BP	GO:0006259	DNA metabolic process	13
BP	GO:0006397	mRNA processing	3
BP	GO:0006412	translation	4
BP	GO:0006457	protein folding	2
BP	GO:0006461	protein complex assembly	2
BP	GO:0006464	cellular protein modification process	21
BP	GO:0006605	protein targeting	3
BP	GO:0006629	lipid metabolic process	7
BP	GO:0006790	sulfur compound metabolic process	1
BP	GO:0006810	transport	39
BP	GO:0006914	autophagy	1
BP	GO:0006950	response to stress	3
BP	GO:0007049	cell cycle	3
BP	GO:0007059	chromosome segregation	3
BP	GO:0007067	mitotic nuclear division	3
BP	GO:0007155	cell adhesion	2
BP	GO:0007165	signal transduction	20
BP	GO:0008150	biological_process	205
BP	GO:0009056	catabolic process	8
BP	GO:0009058	biosynthetic process	43
BP	GO:0016192	vesicle-mediated transport	3
BP	GO:0034641	cellular nitrogen compound metabolic process	50
BP	GO:0042254	ribosome biogenesis	2
BP	GO:0042592	homeostatic process	3
BP	GO:0044281	small molecule metabolic process	1
BP	GO:0051276	chromosome organization	9
BP	GO:0051301	cell division	3
BP	GO:0055085	transmembrane transport	14
BP	GO:0061024	membrane organization	2
CC	GO:0005575	cellular_component	112
CC	GO:0005576	extracellular region	1
CC	GO:0005622	intracellular	45
CC	GO:0005623	cell	45
CC	GO:0005634	nucleus	24
CC	GO:0005694	chromosome	7
CC	GO:0005737	cytoplasm	12
CC	GO:0005739	mitochondrion	1
CC	GO:0005794	Golgi apparatus	3
CC	GO:0005840	ribosome	4
CC	GO:0005856	cytoskeleton	1
CC	GO:0043226	organelle	39
CC	GO:0043234	protein complex	11

## Sheet: Mjav-GO
Class	GO	Description	# in KaKs		Class	GO	Description	# GO in copies	#copies with this GO	#GO in KaKs	#KaKs with this GO	raw_p_over	FDR_over
MF	GO:0000049	tRNA binding	2		MF	GO:0003707	steroid hormone receptor activity	1558	5	268	5	0.000145992	0.00161068
MF	GO:0000166	nucleotide binding	42		MF	GO:0004476	mannose-6-phosphate isomerase activity	1558	5	268	5	0.000145992	0.00161068
MF	GO:0003676	nucleic acid binding	60		MF	GO:0016860	intramolecular oxidoreductase activity	1558	5	268	5	0.000145992	0.00161068
MF	GO:0003677	DNA binding	35		MF	GO:0016861	intramolecular oxidoreductase activity, interconverting aldoses and ketoses	1558	5	268	5	0.000145992	0.00161068
MF	GO:0003700	transcription factor activity, sequence-specific DNA binding	10		MF	GO:0004497	monooxygenase activity	1558	4	268	4	0.000859365	0.0186221
MF	GO:0003707	steroid hormone receptor activity	5		MF	GO:0016714	oxidoreductase activity, acting on paired donors, with incorporation or reduction of molecular oxygen, reduced pteridine as one donor, and incorporation of one atom of oxygen	1558	4	268	4	0.000859365	0.0186221
MF	GO:0003723	RNA binding	15		MF	GO:0003824	catalytic activity	1558	671	268	138	0.00143181	0.021135
MF	GO:0003735	structural constituent of ribosome	4		MF	GO:0016853	isomerase activity	1558	17	268	8	0.00403749	0.0491208
MF	GO:0003755	peptidyl-prolyl cis-trans isomerase activity	1
MF	GO:0003824	catalytic activity	138		BP	GO:0009719	response to endogenous stimulus	1143	5	213	5	0.00021624	0.00163382
MF	GO:0003887	DNA-directed DNA polymerase activity	8		BP	GO:0009725	response to hormone	1143	5	213	5	0.00021624	0.00163382
MF	GO:0003899	DNA-directed RNA polymerase activity	3		BP	GO:0009755	hormone-mediated signaling pathway	1143	5	213	5	0.00021624	0.00163382
MF	GO:0003968	RNA-directed RNA polymerase activity	3		BP	GO:0010033	response to organic substance	1143	5	213	5	0.00021624	0.00163382
MF	GO:0003995	acyl-CoA dehydrogenase activity	2		BP	GO:0014070	response to organic cyclic compound	1143	5	213	5	0.00021624	0.00163382
MF	GO:0004020	adenylylsulfate kinase activity	2		BP	GO:0032870	cellular response to hormone stimulus	1143	5	213	5	0.00021624	0.00163382
MF	GO:0004176	ATP-dependent peptidase activity	2		BP	GO:0033993	response to lipid	1143	5	213	5	0.00021624	0.00163382
MF	GO:0004180	carboxypeptidase activity	6		BP	GO:0043401	steroid hormone mediated signaling pathway	1143	5	213	5	0.00021624	0.00163382
MF	GO:0004181	metallocarboxypeptidase activity	2		BP	GO:0048545	response to steroid hormone	1143	5	213	5	0.00021624	0.00163382
MF	GO:0004185	serine-type carboxypeptidase activity	2		BP	GO:0070887	cellular response to chemical stimulus	1143	5	213	5	0.00021624	0.00163382
MF	GO:0004190	aspartic-type endopeptidase activity	4		BP	GO:0071310	cellular response to organic substance	1143	5	213	5	0.00021624	0.00163382
MF	GO:0004198	calcium-dependent cysteine-type endopeptidase activity	3		BP	GO:0071383	cellular response to steroid hormone stimulus	1143	5	213	5	0.00021624	0.00163382
MF	GO:0004222	metalloendopeptidase activity	2		BP	GO:0071396	cellular response to lipid	1143	5	213	5	0.00021624	0.00163382
MF	GO:0004252	serine-type endopeptidase activity	1		BP	GO:0071407	cellular response to organic cyclic compound	1143	5	213	5	0.00021624	0.00163382
MF	GO:0004298	threonine-type endopeptidase activity	2		BP	GO:0071495	cellular response to endogenous stimulus	1143	5	213	5	0.00021624	0.00163382
MF	GO:0004363	glutathione synthase activity	2		BP	GO:0006505	GPI anchor metabolic process	1143	7	213	5	0.00326565	0.0292948
MF	GO:0004435	phosphatidylinositol phospholipase C activity	2		BP	GO:0006643	membrane lipid metabolic process	1143	7	213	5	0.00326565	0.0292948
MF	GO:0004476	mannose-6-phosphate isomerase activity	5		BP	GO:0006664	glycolipid metabolic process	1143	7	213	5	0.00326565	0.0292948
MF	GO:0004571	mannosyl-oligosaccharide 1,2-alpha-mannosidase activity	1		BP	GO:0042221	response to chemical	1143	7	213	5	0.00326565	0.0292948
MF	GO:0004672	protein kinase activity	14		BP	GO:1903509	liposaccharide metabolic process	1143	7	213	5	0.00326565	0.0292948
MF	GO:0004721	phosphoprotein phosphatase activity	2		BP	GO:0006650	glycerophospholipid metabolic process	1143	10	213	6	0.00422558	0.0347264
MF	GO:0004781	sulfate adenylyltransferase (ATP) activity	2		BP	GO:0046486	glycerolipid metabolic process	1143	10	213	6	0.00422558	0.0347264
MF	GO:0004799	thymidylate synthase activity	3		BP	GO:0046488	phosphatidylinositol metabolic process	1143	10	213	6	0.00422558	0.0347264
MF	GO:0004812	aminoacyl-tRNA ligase activity	4
MF	GO:0004867	serine-type endopeptidase inhibitor activity	4		CC	GO:0005634	nucleus	583	75	94	22	0.00144151	0.0184315
MF	GO:0004930	G-protein coupled receptor activity	3
MF	GO:0004970	ionotropic glutamate receptor activity	1
MF	GO:0005085	guanyl-nucleotide exchange factor activity	2
MF	GO:0005215	transporter activity	19
MF	GO:0005230	extracellular ligand-gated ion channel activity	4
MF	GO:0005234	extracellular-glutamate-gated ion channel activity	1
MF	GO:0005247	voltage-gated chloride channel activity	1
MF	GO:0005262	calcium channel activity	2
MF	GO:0005272	sodium channel activity	2
MF	GO:0005328	neurotransmitter:sodium symporter activity	3
MF	GO:0005375	copper ion transmembrane transporter activity	1
MF	GO:0005506	iron ion binding	4
MF	GO:0005509	calcium ion binding	1
MF	GO:0005515	protein binding	36
MF	GO:0005524	ATP binding	31
MF	GO:0005525	GTP binding	3
MF	GO:0008061	chitin binding	1
MF	GO:0008080	N-acetyltransferase activity	3
MF	GO:0008107	galactoside 2-alpha-L-fucosyltransferase activity	1
MF	GO:0008140	cAMP response element binding protein binding	2
MF	GO:0008158	hedgehog receptor activity	4
MF	GO:0008168	methyltransferase activity	5
MF	GO:0008234	cysteine-type peptidase activity	7
MF	GO:0008236	serine-type peptidase activity	4
MF	GO:0008270	zinc ion binding	17
MF	GO:0008324	cation transmembrane transporter activity	12
MF	GO:0008375	acetylglucosaminyltransferase activity	2
MF	GO:0008408	3'-5' exonuclease activity	8
MF	GO:0008417	fucosyltransferase activity	3
MF	GO:0008641	small protein activating enzyme activity	2
MF	GO:0009982	pseudouridine synthase activity	2
MF	GO:0015078	hydrogen ion transmembrane transporter activity	2
MF	GO:0016491	oxidoreductase activity	24
MF	GO:0016624	oxidoreductase activity, acting on the aldehyde or oxo group of donors, disulfide as acceptor	2
MF	GO:0016627	oxidoreductase activity, acting on the CH-CH group of donors	2
MF	GO:0016705	oxidoreductase activity, acting on paired donors, with incorporation or reduction of molecular oxygen	10
MF	GO:0016706	oxidoreductase activity, acting on paired donors, with incorporation or reduction of molecular oxygen, 2-oxoglutarate as one donor, and incorporation of one atom each of oxygen into both donors	2
MF	GO:0016714	oxidoreductase activity, acting on paired donors, with incorporation or reduction of molecular oxygen, reduced pteridine as one donor, and incorporation of one atom of oxygen	4
MF	GO:0016757	transferase activity, transferring glycosyl groups	11
MF	GO:0016758	transferase activity, transferring hexosyl groups	9
MF	GO:0016779	nucleotidyltransferase activity	17
MF	GO:0016787	hydrolase activity	49
MF	GO:0016788	hydrolase activity, acting on ester bonds	15
MF	GO:0016813	hydrolase activity, acting on carbon-nitrogen (but not peptide) bonds, in linear amidines	3
MF	GO:0016849	phosphorus-oxygen lyase activity	1
MF	GO:0020037	heme binding	4
MF	GO:0030414	peptidase inhibitor activity	5
MF	GO:0033925	mannosyl-glycoprotein endo-beta-N-acetylglucosaminidase activity	1
MF	GO:0035091	phosphatidylinositol binding	2
MF	GO:0042302	structural constituent of cuticle	2
MF	GO:0043565	sequence-specific DNA binding	8
MF	GO:0046983	protein dimerization activity	1
MF	GO:0051536	iron-sulfur cluster binding	2
MF	GO:0051539	4 iron, 4 sulfur cluster binding	1
BP	GO:0000103	sulfate assimilation	2
BP	GO:0000413	protein peptidyl-prolyl isomerization	1
BP	GO:0001522	pseudouridine synthesis	2
BP	GO:0005975	carbohydrate metabolic process	8
BP	GO:0006030	chitin metabolic process	1
BP	GO:0006231	dTMP biosynthetic process	3
BP	GO:0006260	DNA replication	10
BP	GO:0006281	DNA repair	2
BP	GO:0006333	chromatin assembly or disassembly	2
BP	GO:0006338	chromatin remodeling	2
BP	GO:0006351	transcription, DNA-templated	25
BP	GO:0006352	DNA-templated transcription, initiation	7
BP	GO:0006355	regulation of transcription, DNA-templated	15
BP	GO:0006359	regulation of transcription from RNA polymerase III promoter	2
BP	GO:0006367	transcription initiation from RNA polymerase II promoter	1
BP	GO:0006396	RNA processing	4
BP	GO:0006397	mRNA processing	2
BP	GO:0006412	translation	6
BP	GO:0006418	tRNA aminoacylation for protein translation	2
BP	GO:0006457	protein folding	3
BP	GO:0006464	cellular protein modification process	20
BP	GO:0006468	protein phosphorylation	14
BP	GO:0006486	protein glycosylation	2
BP	GO:0006505	GPI anchor metabolic process	5
BP	GO:0006506	GPI anchor biosynthetic process	2
BP	GO:0006508	proteolysis	25
BP	GO:0006511	ubiquitin-dependent protein catabolic process	1
BP	GO:0006629	lipid metabolic process	9
BP	GO:0006750	glutathione biosynthetic process	2
BP	GO:0006777	Mo-molybdopterin cofactor biosynthetic process	1
BP	GO:0006810	transport	33
BP	GO:0006811	ion transport	14
BP	GO:0006812	cation transport	11
BP	GO:0006814	sodium ion transport	4
BP	GO:0006821	chloride transport	1
BP	GO:0006836	neurotransmitter transport	3
BP	GO:0006886	intracellular protein transport	3
BP	GO:0006974	cellular response to DNA damage stimulus	4
BP	GO:0007049	cell cycle	2
BP	GO:0007165	signal transduction	20
BP	GO:0007166	cell surface receptor signaling pathway	2
BP	GO:0007186	G-protein coupled receptor signaling pathway	5
BP	GO:0007218	neuropeptide signaling pathway	2
BP	GO:0007264	small GTPase mediated signal transduction	2
BP	GO:0007275	multicellular organismal development	1
BP	GO:0008152	metabolic process	164
BP	GO:0009190	cyclic nucleotide biosynthetic process	1
BP	GO:0009451	RNA modification	3
BP	GO:0009966	regulation of signal transduction	2
BP	GO:0015074	DNA integration	14
BP	GO:0015991	ATP hydrolysis coupled proton transport	2
BP	GO:0016192	vesicle-mediated transport	1
BP	GO:0030488	tRNA methylation	1
BP	GO:0035434	copper ion transmembrane transport	1
BP	GO:0035556	intracellular signal transduction	5
BP	GO:0043039	tRNA aminoacylation	4
BP	GO:0043401	steroid hormone mediated signaling pathway	5
BP	GO:0045454	cell redox homeostasis	1
BP	GO:0046854	phosphatidylinositol phosphorylation	1
BP	GO:0046907	intracellular transport	5
BP	GO:0048478	replication fork protection	2
BP	GO:0051260	protein homooligomerization	3
BP	GO:0051289	protein homotetramerization	2
BP	GO:0051603	proteolysis involved in cellular protein catabolic process	3
BP	GO:0055085	transmembrane transport	16
BP	GO:0055114	oxidation-reduction process	22
BP	GO:0070588	calcium ion transmembrane transport	2
CC	GO:0005576	extracellular region	2
CC	GO:0005622	intracellular	36
CC	GO:0005634	nucleus	22
CC	GO:0005737	cytoplasm	9
CC	GO:0005839	proteasome core complex	2
CC	GO:0005840	ribosome	4
CC	GO:0016020	membrane	55
CC	GO:0016021	integral component of membrane	20
CC	GO:0019008	molybdopterin synthase complex	1
CC	GO:0031515	tRNA (m1A) methyltransferase complex	1
CC	GO:0033177	proton-transporting two-sector ATPase complex, proton-transporting domain	2
CC	GO:0090544	BAF-type complex	2

## Sheet: Mjav-GOSLIM
Class	GO	Description	# in KaKs		Class	GO	Description	# GO in copies	#copies with this GO	#GO in KaKs	#KaKs with this GO	raw_p_over	FDR_over
MF	GO:0001071	nucleic acid binding transcription factor activity	10		MF	GO:0003824	catalytic activity	1558	548	268	121	0.000134726	0.000501893
MF	GO:0003674	molecular_function	268		MF	GO:0016853	isomerase activity	1558	17	268	8	0.00403749	0.0362606
MF	GO:0003677	DNA binding	35
MF	GO:0003723	RNA binding	15		Class	GO	Description	# GO in copies	#copies with this GO	#GO in KaKs	#KaKs with this GO	raw_p_over	FDR_over
MF	GO:0003735	structural constituent of ribosome	4		BP	None	None	NA	NA	NA	NA	NA	NA
MF	GO:0004518	nuclease activity	8
MF	GO:0004871	signal transducer activity	13		Class	GO	Description	# GO in copies	#copies with this GO	#GO in KaKs	#KaKs with this GO	raw_p_over	FDR_over
MF	GO:0005198	structural molecule activity	6		CC	GO:0005634	nucleus	583	77	94	22	0.00214123	0.0128516
MF	GO:0008134	transcription factor binding	2
MF	GO:0008168	methyltransferase activity	5
MF	GO:0008233	peptidase activity	24
MF	GO:0008289	lipid binding	2
MF	GO:0016301	kinase activity	16
MF	GO:0016491	oxidoreductase activity	24
MF	GO:0016746	transferase activity, transferring acyl groups	3
MF	GO:0016757	transferase activity, transferring glycosyl groups	11
MF	GO:0016779	nucleotidyltransferase activity	17
MF	GO:0016791	phosphatase activity	2
MF	GO:0016798	hydrolase activity, acting on glycosyl bonds	2
MF	GO:0016810	hydrolase activity, acting on carbon-nitrogen (but not peptide) bonds	3
MF	GO:0016829	lyase activity	1
MF	GO:0016853	isomerase activity	8
MF	GO:0016874	ligase activity	8
MF	GO:0016887	ATPase activity	2
MF	GO:0022857	transmembrane transporter activity	17
MF	GO:0030234	enzyme regulator activity	5
MF	GO:0043167	ion binding	58
BP	GO:0005975	carbohydrate metabolic process	8
BP	GO:0006259	DNA metabolic process	26
BP	GO:0006397	mRNA processing	2
BP	GO:0006399	tRNA metabolic process	5
BP	GO:0006412	translation	6
BP	GO:0006457	protein folding	3
BP	GO:0006461	protein complex assembly	3
BP	GO:0006464	cellular protein modification process	20
BP	GO:0006520	cellular amino acid metabolic process	4
BP	GO:0006629	lipid metabolic process	9
BP	GO:0006790	sulfur compound metabolic process	4
BP	GO:0006810	transport	33
BP	GO:0006950	response to stress	4
BP	GO:0007049	cell cycle	2
BP	GO:0007165	signal transduction	20
BP	GO:0008150	biological_process	213
BP	GO:0009056	catabolic process	3
BP	GO:0009058	biosynthetic process	52
BP	GO:0016192	vesicle-mediated transport	1
BP	GO:0034641	cellular nitrogen compound metabolic process	71
BP	GO:0042592	homeostatic process	1
BP	GO:0044281	small molecule metabolic process	8
BP	GO:0051186	cofactor metabolic process	1
BP	GO:0051276	chromosome organization	4
BP	GO:0055085	transmembrane transport	16
CC	GO:0005575	cellular_component	94
CC	GO:0005576	extracellular region	2
CC	GO:0005622	intracellular	36
CC	GO:0005623	cell	37
CC	GO:0005634	nucleus	22
CC	GO:0005737	cytoplasm	9
CC	GO:0005840	ribosome	4
CC	GO:0043226	organelle	26
CC	GO:0043234	protein complex	8

## Sheet: Mare-GO
Class	GO	Description	# in KaKs		Class	GO	Description	# GO in copies	#copies with this GO	#GO in KaKs	#KaKs with this GO	raw_p_over	FDR_over
MF	GO:0000166	nucleotide binding	117		MF	GO:0010181	FMN binding	4691	5	766	5	0.000114832	0.00723541
MF	GO:0000287	magnesium ion binding	1		MF	GO:0004133	glycogen debranching enzyme activity	4691	4	766	4	0.000706321	0.0223612
MF	GO:0001104	RNA polymerase II transcription cofactor activity	8		MF	GO:0004134	4-alpha-glucanotransferase activity	4691	4	766	4	0.000706321	0.0223612
MF	GO:0003676	nucleic acid binding	155		MF	GO:0004135	amylo-alpha-1,6-glucosidase activity	4691	4	766	4	0.000706321	0.0223612
MF	GO:0003677	DNA binding	82		MF	GO:0015926	glucosidase activity	4691	4	766	4	0.000706321	0.0223612
MF	GO:0003700	transcription factor activity, sequence-specific DNA binding	17		MF	GO:0090599	alpha-glucosidase activity	4691	4	766	4	0.000706321	0.0223612
MF	GO:0003707	steroid hormone receptor activity	3		MF	GO:0016758	transferase activity, transferring hexosyl groups	4691	94	766	27	0.00163334	0.03641
MF	GO:0003712	transcription cofactor activity	10		MF	GO:0004888	transmembrane signaling receptor activity	4691	139	766	36	0.00233574	0.0494793
MF	GO:0003723	RNA binding	27
MF	GO:0003735	structural constituent of ribosome	14		Class	GO	Description	# GO in copies	#copies with this GO	#GO in KaKs	#KaKs with this GO	raw_p_over	FDR_over
MF	GO:0003743	translation initiation factor activity	5		BP	GO:0010639	negative regulation of organelle organization	3346	9	559	7	9.275e-05	0.00530793
MF	GO:0003746	translation elongation factor activity	3		BP	GO:0051129	negative regulation of cellular component organization	3346	9	559	7	9.275e-05	0.00530793
MF	GO:0003747	translation release factor activity	2		BP	GO:0051494	negative regulation of cytoskeleton organization	3346	9	559	7	9.275e-05	0.00530793
MF	GO:0003777	microtubule motor activity	5		BP	GO:0000272	polysaccharide catabolic process	3346	4	559	4	0.00077206	0.00682087
MF	GO:0003824	catalytic activity	318		BP	GO:0000902	cell morphogenesis	3346	4	559	4	0.00077206	0.00682087
MF	GO:0003840	gamma-glutamyltransferase activity	4		BP	GO:0005976	polysaccharide metabolic process	3346	4	559	4	0.00077206	0.00682087
MF	GO:0003887	DNA-directed DNA polymerase activity	14		BP	GO:0005977	glycogen metabolic process	3346	4	559	4	0.00077206	0.00682087
MF	GO:0003899	DNA-directed RNA polymerase activity	3		BP	GO:0005980	glycogen catabolic process	3346	4	559	4	0.00077206	0.00682087
MF	GO:0003916	DNA topoisomerase activity	2		BP	GO:0006073	cellular glucan metabolic process	3346	4	559	4	0.00077206	0.00682087
MF	GO:0003924	GTPase activity	3		BP	GO:0006112	energy reserve metabolic process	3346	4	559	4	0.00077206	0.00682087
MF	GO:0003950	NAD+ ADP-ribosyltransferase activity	3		BP	GO:0007098	centrosome cycle	3346	4	559	4	0.00077206	0.00682087
MF	GO:0003968	RNA-directed RNA polymerase activity	1		BP	GO:0009251	glucan catabolic process	3346	4	559	4	0.00077206	0.00682087
MF	GO:0004114	3',5'-cyclic-nucleotide phosphodiesterase activity	2		BP	GO:0009653	anatomical structure morphogenesis	3346	4	559	4	0.00077206	0.00682087
MF	GO:0004134	4-alpha-glucanotransferase activity	4		BP	GO:0010564	regulation of cell cycle process	3346	4	559	4	0.00077206	0.00682087
MF	GO:0004135	amylo-alpha-1,6-glucosidase activity	4		BP	GO:0010824	regulation of centrosome duplication	3346	4	559	4	0.00077206	0.00682087
MF	GO:0004143	diacylglycerol kinase activity	1		BP	GO:0010826	negative regulation of centrosome duplication	3346	4	559	4	0.00077206	0.00682087
MF	GO:0004174	electron-transferring-flavoprotein dehydrogenase activity	2		BP	GO:0010927	cellular component assembly involved in morphogenesis	3346	4	559	4	0.00077206	0.00682087
MF	GO:0004175	endopeptidase activity	22		BP	GO:0010948	negative regulation of cell cycle process	3346	4	559	4	0.00077206	0.00682087
MF	GO:0004176	ATP-dependent peptidase activity	2		BP	GO:0030030	cell projection organization	3346	4	559	4	0.00077206	0.00682087
MF	GO:0004177	aminopeptidase activity	3		BP	GO:0030031	cell projection assembly	3346	4	559	4	0.00077206	0.00682087
MF	GO:0004180	carboxypeptidase activity	6		BP	GO:0031023	microtubule organizing center organization	3346	4	559	4	0.00077206	0.00682087
MF	GO:0004185	serine-type carboxypeptidase activity	4		BP	GO:0032886	regulation of microtubule-based process	3346	4	559	4	0.00077206	0.00682087
MF	GO:0004190	aspartic-type endopeptidase activity	1		BP	GO:0032989	cellular component morphogenesis	3346	4	559	4	0.00077206	0.00682087
MF	GO:0004198	calcium-dependent cysteine-type endopeptidase activity	2		BP	GO:0032990	cell part morphogenesis	3346	4	559	4	0.00077206	0.00682087
MF	GO:0004222	metalloendopeptidase activity	10		BP	GO:0042384	cilium assembly	3346	4	559	4	0.00077206	0.00682087
MF	GO:0004252	serine-type endopeptidase activity	5		BP	GO:0044042	glucan metabolic process	3346	4	559	4	0.00077206	0.00682087
MF	GO:0004298	threonine-type endopeptidase activity	4		BP	GO:0044247	cellular polysaccharide catabolic process	3346	4	559	4	0.00077206	0.00682087
MF	GO:0004329	formate-tetrahydrofolate ligase activity	1		BP	GO:0044264	cellular polysaccharide metabolic process	3346	4	559	4	0.00077206	0.00682087
MF	GO:0004488	methylenetetrahydrofolate dehydrogenase (NADP+) activity	2		BP	GO:0044275	cellular carbohydrate catabolic process	3346	4	559	4	0.00077206	0.00682087
MF	GO:0004550	nucleoside diphosphate kinase activity	2		BP	GO:0044782	cilium organization	3346	4	559	4	0.00077206	0.00682087
MF	GO:0004553	hydrolase activity, hydrolyzing O-glycosyl compounds	11		BP	GO:0045786	negative regulation of cell cycle	3346	4	559	4	0.00077206	0.00682087
MF	GO:0004571	mannosyl-oligosaccharide 1,2-alpha-mannosidase activity	2		BP	GO:0046605	regulation of centrosome cycle	3346	4	559	4	0.00077206	0.00682087
MF	GO:0004616	phosphogluconate dehydrogenase (decarboxylating) activity	1		BP	GO:0046606	negative regulation of centrosome cycle	3346	4	559	4	0.00077206	0.00682087
MF	GO:0004631	phosphomevalonate kinase activity	3		BP	GO:0048646	anatomical structure formation involved in morphogenesis	3346	4	559	4	0.00077206	0.00682087
MF	GO:0004649	poly(ADP-ribose) glycohydrolase activity	3		BP	GO:0048856	anatomical structure development	3346	4	559	4	0.00077206	0.00682087
MF	GO:0004652	polynucleotide adenylyltransferase activity	12		BP	GO:0048858	cell projection morphogenesis	3346	4	559	4	0.00077206	0.00682087
MF	GO:0004671	protein C-terminal S-isoprenylcysteine carboxyl O-methyltransferase activity	2		BP	GO:0048869	cellular developmental process	3346	4	559	4	0.00077206	0.00682087
MF	GO:0004672	protein kinase activity	38		BP	GO:0051297	centrosome organization	3346	4	559	4	0.00077206	0.00682087
MF	GO:0004725	protein tyrosine phosphatase activity	2		BP	GO:0051298	centrosome duplication	3346	4	559	4	0.00077206	0.00682087
MF	GO:0004812	aminoacyl-tRNA ligase activity	3		BP	GO:0060271	cilium morphogenesis	3346	4	559	4	0.00077206	0.00682087
MF	GO:0004843	ubiquitin-specific protease activity	1		BP	GO:0070507	regulation of microtubule cytoskeleton organization	3346	4	559	4	0.00077206	0.00682087
MF	GO:0004857	enzyme inhibitor activity	9		BP	GO:0007029	endoplasmic reticulum organization	3346	5	559	5	0.000128215	0.00825648
MF	GO:0004866	endopeptidase inhibitor activity	8		BP	GO:0044262	cellular carbohydrate metabolic process	3346	12	559	7	0.00128181	0.0108413
MF	GO:0004867	serine-type endopeptidase inhibitor activity	5		BP	GO:0048519	negative regulation of biological process	3346	29	559	12	0.00139307	0.0109874
MF	GO:0004871	signal transducer activity	41		BP	GO:0032501	multicellular organismal process	3346	42	559	15	0.00216701	0.0161451
MF	GO:0004888	transmembrane signaling receptor activity	36		BP	GO:0044707	single-multicellular organism process	3346	42	559	15	0.00216701	0.0161451
MF	GO:0004930	G-protein coupled receptor activity	18		BP	GO:0003008	system process	3346	35	559	13	0.00284137	0.0197716
MF	GO:0004970	ionotropic glutamate receptor activity	2		BP	GO:0007600	sensory perception	3346	35	559	13	0.00284137	0.0197716
MF	GO:0005085	guanyl-nucleotide exchange factor activity	2		BP	GO:0007606	sensory perception of chemical stimulus	3346	35	559	13	0.00284137	0.0197716
MF	GO:0005089	Rho guanyl-nucleotide exchange factor activity	1		BP	GO:0050877	neurological system process	3346	35	559	13	0.00284137	0.0197716
MF	GO:0005198	structural molecule activity	22		BP	GO:0032502	developmental process	3346	11	559	6	0.0045944	0.0316256
MF	GO:0005215	transporter activity	51		BP	GO:0044283	small molecule biosynthetic process	3346	11	559	6	0.0045944	0.0316256
MF	GO:0005216	ion channel activity	12		BP	GO:0044767	single-organism developmental process	3346	11	559	6	0.0045944	0.0316256
MF	GO:0005230	extracellular ligand-gated ion channel activity	8		BP	GO:0006695	cholesterol biosynthetic process	3346	3	559	3	0.00464208	0.0342075
MF	GO:0005234	extracellular-glutamate-gated ion channel activity	1		BP	GO:0009893	positive regulation of metabolic process	3346	3	559	3	0.00464208	0.0342075
MF	GO:0005247	voltage-gated chloride channel activity	1		BP	GO:0016126	sterol biosynthetic process	3346	3	559	3	0.00464208	0.0342075
MF	GO:0005319	lipid transporter activity	3		BP	GO:0031325	positive regulation of cellular metabolic process	3346	3	559	3	0.00464208	0.0342075
MF	GO:0005351	sugar:proton symporter activity	3		BP	GO:0043087	regulation of GTPase activity	3346	3	559	3	0.00464208	0.0342075
MF	GO:0005375	copper ion transmembrane transporter activity	2		BP	GO:0045048	protein insertion into ER membrane	3346	3	559	3	0.00464208	0.0342075
MF	GO:0005507	copper ion binding	2		BP	GO:0046165	alcohol biosynthetic process	3346	3	559	3	0.00464208	0.0342075
MF	GO:0005509	calcium ion binding	9		BP	GO:0051205	protein insertion into membrane	3346	3	559	3	0.00464208	0.0342075
MF	GO:0005515	protein binding	134		BP	GO:0071816	tail-anchored membrane protein insertion into ER membrane	3346	3	559	3	0.00464208	0.0342075
MF	GO:0005524	ATP binding	73		BP	GO:1901617	organic hydroxy compound biosynthetic process	3346	3	559	3	0.00464208	0.0342075
MF	GO:0005525	GTP binding	15		BP	GO:0043631	RNA polyadenylation	3346	33	559	12	0.00500623	0.0359871
MF	GO:0008017	microtubule binding	5		BP	GO:0033043	regulation of organelle organization	3346	15	559	7	0.00656979	0.0388043
MF	GO:0008080	N-acetyltransferase activity	4		BP	GO:0051128	regulation of cellular component organization	3346	15	559	7	0.00656979	0.0388043
MF	GO:0008107	galactoside 2-alpha-L-fucosyltransferase activity	3		BP	GO:0051493	regulation of cytoskeleton organization	3346	15	559	7	0.00656979	0.0388043
MF	GO:0008137	NADH dehydrogenase (ubiquinone) activity	1		BP	GO:0006644	phospholipid metabolic process	3346	26	559	10	0.0064773	0.0397097
MF	GO:0008158	hedgehog receptor activity	11
MF	GO:0008168	methyltransferase activity	12		Class	GO	Description	# GO in copies	#copies with this GO	#GO in KaKs	#KaKs with this GO	raw_p_over	FDR_over
MF	GO:0008184	glycogen phosphorylase activity	3		CC	GO:0005929	cilium	1753	4	283	4	0.000667206	0.00698754
MF	GO:0008233	peptidase activity	48		CC	GO:0031513	nonmotile primary cilium	1753	4	283	4	0.000667206	0.00698754
MF	GO:0008234	cysteine-type peptidase activity	8		CC	GO:0035869	ciliary transition zone	1753	4	283	4	0.000667206	0.00698754
MF	GO:0008236	serine-type peptidase activity	11		CC	GO:0036038	TCTN-B9D complex	1753	4	283	4	0.000667206	0.00698754
MF	GO:0008237	metallopeptidase activity	12		CC	GO:0042995	cell projection	1753	4	283	4	0.000667206	0.00698754
MF	GO:0008270	zinc ion binding	51		CC	GO:0044441	ciliary part	1753	4	283	4	0.000667206	0.00698754
MF	GO:0008289	lipid binding	6		CC	GO:0044463	cell projection part	1753	4	283	4	0.000667206	0.00698754
MF	GO:0008324	cation transmembrane transporter activity	20		CC	GO:0072372	primary cilium	1753	4	283	4	0.000667206	0.00698754
MF	GO:0008375	acetylglucosaminyltransferase activity	2		CC	GO:0016020	membrane	1753	902	283	172	0.000370931	0.0096935
MF	GO:0008376	acetylgalactosaminyltransferase activity	3		CC	GO:0016021	integral component of membrane	1753	417	283	87	0.00208022	0.0149891
MF	GO:0008408	3'-5' exonuclease activity	16		CC	GO:0031224	intrinsic component of membrane	1753	417	283	87	0.00208022	0.0149891
MF	GO:0008430	selenium binding	2		CC	GO:0044454	nuclear chromosome part	1753	5	283	4	0.0029103	0.0224593
MF	GO:0008484	sulfuric ester hydrolase activity	3		CC	GO:0000176	nuclear exosome (RNase complex)	1753	3	283	3	0.00417003	0.0351403
MF	GO:0008536	Ran GTPase binding	4		CC	GO:0000178	exosome (RNase complex)	1753	3	283	3	0.00417003	0.0351403
MF	GO:0008641	small protein activating enzyme activity	1		CC	GO:0033557	Slx1-Slx4 complex	1753	3	283	3	0.00417003	0.0351403
MF	GO:0009982	pseudouridine synthase activity	1
MF	GO:0010181	FMN binding	5
MF	GO:0015078	hydrogen ion transmembrane transporter activity	7
MF	GO:0015116	sulfate transmembrane transporter activity	3
MF	GO:0015930	glutamate synthase activity	1
MF	GO:0016209	antioxidant activity	2
MF	GO:0016301	kinase activity	46
MF	GO:0016307	phosphatidylinositol phosphate kinase activity	2
MF	GO:0016491	oxidoreductase activity	43
MF	GO:0016531	copper chaperone activity	2
MF	GO:0016614	oxidoreductase activity, acting on CH-OH group of donors	3
MF	GO:0016624	oxidoreductase activity, acting on the aldehyde or oxo group of donors, disulfide as acceptor	2
MF	GO:0016627	oxidoreductase activity, acting on the CH-CH group of donors	2
MF	GO:0016638	oxidoreductase activity, acting on the CH-NH2 group of donors	1
MF	GO:0016706	oxidoreductase activity, acting on paired donors, with incorporation or reduction of molecular oxygen, 2-oxoglutarate as one donor, and incorporation of one atom each of oxygen into both donors	2
MF	GO:0016714	oxidoreductase activity, acting on paired donors, with incorporation or reduction of molecular oxygen, reduced pteridine as one donor, and incorporation of one atom of oxygen	3
MF	GO:0016740	transferase activity	144
MF	GO:0016746	transferase activity, transferring acyl groups	20
MF	GO:0016747	transferase activity, transferring acyl groups other than amino-acyl groups	7
MF	GO:0016758	transferase activity, transferring hexosyl groups	27
MF	GO:0016773	phosphotransferase activity, alcohol group as acceptor	42
MF	GO:0016779	nucleotidyltransferase activity	32
MF	GO:0016780	phosphotransferase activity, for other substituted phosphate groups	2
MF	GO:0016787	hydrolase activity	122
MF	GO:0016788	hydrolase activity, acting on ester bonds	29
MF	GO:0016810	hydrolase activity, acting on carbon-nitrogen (but not peptide) bonds	1
MF	GO:0016849	phosphorus-oxygen lyase activity	4
MF	GO:0016887	ATPase activity	8
MF	GO:0017025	TBP-class protein binding	1
MF	GO:0017108	5'-flap endonuclease activity	3
MF	GO:0017153	sodium:dicarboxylate symporter activity	3
MF	GO:0017176	phosphatidylinositol N-acetylglucosaminyltransferase activity	1
MF	GO:0019001	guanyl nucleotide binding	17
MF	GO:0022857	transmembrane transporter activity	45
MF	GO:0030145	manganese ion binding	3
MF	GO:0030170	pyridoxal phosphate binding	3
MF	GO:0030246	carbohydrate binding	9
MF	GO:0030570	pectate lyase activity	1
MF	GO:0030976	thiamine pyrophosphate binding	2
MF	GO:0031625	ubiquitin protein ligase binding	1
MF	GO:0031683	G-protein beta/gamma-subunit complex binding	2
MF	GO:0035091	phosphatidylinositol binding	4
MF	GO:0036459	ubiquitinyl hydrolase activity	2
MF	GO:0042302	structural constituent of cuticle	7
MF	GO:0042626	ATPase activity, coupled to transmembrane movement of substances	4
MF	GO:0043395	heparan sulfate proteoglycan binding	1
MF	GO:0043565	sequence-specific DNA binding	14
MF	GO:0046872	metal ion binding	84
MF	GO:0046873	metal ion transmembrane transporter activity	7
MF	GO:0046912	transferase activity, transferring acyl groups, acyl groups converted into alkyl on transfer	3
MF	GO:0046923	ER retention sequence binding	2
MF	GO:0046933	proton-transporting ATP synthase activity, rotational mechanism	2
MF	GO:0046961	proton-transporting ATPase activity, rotational mechanism	2
MF	GO:0046983	protein dimerization activity	8
MF	GO:0050385	ureidoglycolate lyase activity	1
MF	GO:0050660	flavin adenine dinucleotide binding	3
MF	GO:0051082	unfolded protein binding	4
MF	GO:0051287	NAD binding	3
MF	GO:0051536	iron-sulfur cluster binding	2
MF	GO:0051539	4 iron, 4 sulfur cluster binding	1
MF	GO:0070008	serine-type exopeptidase activity	6
MF	GO:0070403	NAD+ binding	1
BP	GO:0000077	DNA damage checkpoint		1
BP	GO:0000256	allantoin catabolic process		1
BP	GO:0001510	RNA methylation		2
BP	GO:0001522	pseudouridine synthesis		1
BP	GO:0005975	carbohydrate metabolic process		23
BP	GO:0005980	glycogen catabolic process		4
BP	GO:0006139	nucleobase-containing compound metabolic process		146
BP	GO:0006165	nucleoside diphosphate phosphorylation		2
BP	GO:0006183	GTP biosynthetic process		2
BP	GO:0006228	UTP biosynthetic process		2
BP	GO:0006241	CTP biosynthetic process		2
BP	GO:0006260	DNA replication		19
BP	GO:0006265	DNA topological change		2
BP	GO:0006281	DNA repair		8
BP	GO:0006289	nucleotide-excision repair		2
BP	GO:0006303	double-strand break repair via nonhomologous end joining		2
BP	GO:0006334	nucleosome assembly		2
BP	GO:0006351	transcription, DNA-templated		51
BP	GO:0006352	DNA-templated transcription, initiation		11
BP	GO:0006355	regulation of transcription, DNA-templated		36
BP	GO:0006357	regulation of transcription from RNA polymerase II promoter		8
BP	GO:0006364	rRNA processing		4
BP	GO:0006396	RNA processing		19
BP	GO:0006397	mRNA processing		7
BP	GO:0006412	translation		27
BP	GO:0006413	translational initiation		5
BP	GO:0006414	translational elongation		3
BP	GO:0006415	translational termination		2
BP	GO:0006418	tRNA aminoacylation for protein translation		3
BP	GO:0006457	protein folding		6
BP	GO:0006464	cellular protein modification process		50
BP	GO:0006465	signal peptide processing		2
BP	GO:0006468	protein phosphorylation		38
BP	GO:0006470	protein dephosphorylation		4
BP	GO:0006471	protein ADP-ribosylation		2
BP	GO:0006481	C-terminal protein methylation		2
BP	GO:0006505	GPI anchor metabolic process		4
BP	GO:0006506	GPI anchor biosynthetic process		2
BP	GO:0006508	proteolysis		51
BP	GO:0006511	ubiquitin-dependent protein catabolic process		9
BP	GO:0006537	glutamate biosynthetic process		1
BP	GO:0006605	protein targeting		3
BP	GO:0006621	protein retention in ER lumen		2
BP	GO:0006629	lipid metabolic process		16
BP	GO:0006695	cholesterol biosynthetic process		3
BP	GO:0006749	glutathione metabolic process		4
BP	GO:0006777	Mo-molybdopterin cofactor biosynthetic process		3
BP	GO:0006807	nitrogen compound metabolic process		184
BP	GO:0006810	transport		93
BP	GO:0006811	ion transport		34
BP	GO:0006812	cation transport		17
BP	GO:0006814	sodium ion transport		1
BP	GO:0006821	chloride transport		1
BP	GO:0006825	copper ion transport		4
BP	GO:0006835	dicarboxylic acid transport		3
BP	GO:0006869	lipid transport		3
BP	GO:0006886	intracellular protein transport		10
BP	GO:0006904	vesicle docking involved in exocytosis		4
BP	GO:0006950	response to stress		10
BP	GO:0007018	microtubule-based movement		5
BP	GO:0007029	endoplasmic reticulum organization		5
BP	GO:0007034	vacuolar transport		1
BP	GO:0007155	cell adhesion		1
BP	GO:0007165	signal transduction		43
BP	GO:0007166	cell surface receptor signaling pathway		2
BP	GO:0007186	G-protein coupled receptor signaling pathway		22
BP	GO:0007205	protein kinase C-activating G-protein coupled receptor signaling pathway		1
BP	GO:0007264	small GTPase mediated signal transduction		10
BP	GO:0007275	multicellular organismal development		2
BP	GO:0007606	sensory perception of chemical stimulus		13
BP	GO:0008033	tRNA processing		1
BP	GO:0008152	metabolic process		395
BP	GO:0008272	sulfate transport		3
BP	GO:0008643	carbohydrate transport		3
BP	GO:0008654	phospholipid biosynthetic process		4
BP	GO:0009058	biosynthetic process		127
BP	GO:0009116	nucleoside metabolic process		5
BP	GO:0009190	cyclic nucleotide biosynthetic process		4
BP	GO:0009396	folic acid-containing compound biosynthetic process		2
BP	GO:0009451	RNA modification		3
BP	GO:0009452	7-methylguanosine RNA capping		2
BP	GO:0010508	positive regulation of autophagy		1
BP	GO:0010826	negative regulation of centrosome duplication		4
BP	GO:0015031	protein transport		14
BP	GO:0015074	DNA integration		23
BP	GO:0015986	ATP synthesis coupled proton transport		2
BP	GO:0015991	ATP hydrolysis coupled proton transport		5
BP	GO:0016192	vesicle-mediated transport		7
BP	GO:0016255	attachment of GPI anchor to protein		1
BP	GO:0016480	negative regulation of transcription from RNA polymerase III promoter		1
BP	GO:0030001	metal ion transport		7
BP	GO:0030259	lipid glycosylation		1
BP	GO:0032259	methylation		6
BP	GO:0035023	regulation of Rho protein signal transduction		1
BP	GO:0035307	positive regulation of protein dephosphorylation		2
BP	GO:0035434	copper ion transmembrane transport		2
BP	GO:0035556	intracellular signal transduction		15
BP	GO:0038032	termination of G-protein coupled receptor signaling pathway		1
BP	GO:0042384	cilium assembly		4
BP	GO:0043087	regulation of GTPase activity		3
BP	GO:0043401	steroid hormone mediated signaling pathway		3
BP	GO:0043631	RNA polyadenylation		12
BP	GO:0044262	cellular carbohydrate metabolic process		7
BP	GO:0045454	cell redox homeostasis		6
BP	GO:0045980	negative regulation of nucleotide metabolic process		1
BP	GO:0046488	phosphatidylinositol metabolic process		8
BP	GO:0046854	phosphatidylinositol phosphorylation		2
BP	GO:0046907	intracellular transport		16
BP	GO:0051016	barbed-end actin filament capping		3
BP	GO:0051028	mRNA transport		1
BP	GO:0051260	protein homooligomerization		2
BP	GO:0051276	chromosome organization		6
BP	GO:0051603	proteolysis involved in cellular protein catabolic process		11
BP	GO:0055085	transmembrane transport		40
BP	GO:0055114	oxidation-reduction process		39
BP	GO:0071816	tail-anchored membrane protein insertion into ER membrane		3
CC	GO:0000139	Golgi membrane		6
CC	GO:0000176	nuclear exosome (RNase complex)		3
CC	GO:0000275	mitochondrial proton-transporting ATP synthase complex, catalytic core F(1)		2
CC	GO:0000439	core TFIIH complex		2
CC	GO:0000445	THO complex part of transcription export complex		1
CC	GO:0000786	nucleosome		2
CC	GO:0005576	extracellular region		11
CC	GO:0005578	proteinaceous extracellular matrix		1
CC	GO:0005615	extracellular space		9
CC	GO:0005622	intracellular		113
CC	GO:0005634	nucleus		51
CC	GO:0005669	transcription factor TFIID complex		1
CC	GO:0005694	chromosome		8
CC	GO:0005730	nucleolus		3
CC	GO:0005737	cytoplasm		47
CC	GO:0005739	mitochondrion		6
CC	GO:0005758	mitochondrial intermembrane space		2
CC	GO:0005783	endoplasmic reticulum		10
CC	GO:0005787	signal peptidase complex		2
CC	GO:0005789	endoplasmic reticulum membrane		8
CC	GO:0005839	proteasome core complex		4
CC	GO:0005840	ribosome		14
CC	GO:0008290	F-actin capping protein complex		3
CC	GO:0016020	membrane		172
CC	GO:0016021	integral component of membrane		87
CC	GO:0016592	mediator complex		8
CC	GO:0019008	molybdopterin synthase complex		1
CC	GO:0019773	proteasome core complex, alpha-subunit complex		2
CC	GO:0030896	checkpoint clamp complex		1
CC	GO:0031012	extracellular matrix		2
CC	GO:0031461	cullin-RING ubiquitin ligase complex		1
CC	GO:0032580	Golgi cisterna membrane		3
CC	GO:0033179	proton-transporting V-type ATPase, V0 domain		5
CC	GO:0033557	Slx1-Slx4 complex		3
CC	GO:0036038	TCTN-B9D complex		4
CC	GO:0042765	GPI-anchor transamidase complex		1
CC	GO:0071595	Nem1-Spo7 phosphatase complex		2

## Sheet: Mare-GOSLIM
Class	GO	Description	# in KaKs		Class	GO	Description	# GO in copies	#copies with this GO	#GO in KaKs	#KaKs with this GO	raw_p_over	FDR_over
MF	GO:0000988	transcription factor activity, protein binding	10		MF	None	None	NA	NA	NA	NA	NA	NA
MF	GO:0001071	nucleic acid binding transcription factor activity	17
MF	GO:0003674	molecular_function	766
MF	GO:0003677	DNA binding	82		Class	GO	Description	# GO in copies	#copies with this GO	#GO in KaKs	#KaKs with this GO	raw_p_over	FDR_over
MF	GO:0003723	RNA binding	27		BP	GO:0000902	cell morphogenesis	3346	4	559	4	0.00077206	0.00643329
MF	GO:0003735	structural constituent of ribosome	14		BP	GO:0009653	anatomical structure morphogenesis	3346	4	559	4	0.00077206	0.00643329
MF	GO:0003924	GTPase activity	3		BP	GO:0032502	developmental process	3346	4	559	4	0.00077206	0.00643329
MF	GO:0004518	nuclease activity	19		BP	GO:0032989	cellular component morphogenesis	3346	4	559	4	0.00077206	0.00643329
MF	GO:0004871	signal transducer activity	41		BP	GO:0044767	single-organism developmental process	3346	4	559	4	0.00077206	0.00643329
MF	GO:0005198	structural molecule activity	22		BP	GO:0048646	anatomical structure formation involved in morphogenesis	3346	4	559	4	0.00077206	0.00643329
MF	GO:0008092	cytoskeletal protein binding	5		BP	GO:0048856	anatomical structure development	3346	4	559	4	0.00077206	0.00643329
MF	GO:0008134	transcription factor binding	1		BP	GO:0048869	cellular developmental process	3346	4	559	4	0.00077206	0.00643329
MF	GO:0008135	translation factor activity, RNA binding	10		BP	GO:0003008	system process	3346	35	559	13	0.00284137	0.0146454
MF	GO:0008168	methyltransferase activity	12		BP	GO:0032501	multicellular organismal process	3346	35	559	13	0.00284137	0.0146454
MF	GO:0008233	peptidase activity	49		BP	GO:0044707	single-multicellular organism process	3346	35	559	13	0.00284137	0.0146454
MF	GO:0008289	lipid binding	6		BP	GO:0050877	neurological system process	3346	35	559	13	0.00284137	0.0146454
MF	GO:0016301	kinase activity	46
MF	GO:0016491	oxidoreductase activity	43
MF	GO:0016746	transferase activity, transferring acyl groups	20		Class	GO	Description	# GO in copies	#copies with this GO	#GO in KaKs	#KaKs with this GO	raw_p_over	FDR_over
MF	GO:0016757	transferase activity, transferring glycosyl groups	30		CC	GO:0005929	cilium	1753	4	283	4	0.000667206	0.00561798
MF	GO:0016779	nucleotidyltransferase activity	32		CC	GO:0042995	cell projection	1753	4	283	4	0.000667206	0.00561798
MF	GO:0016791	phosphatase activity	2
MF	GO:0016798	hydrolase activity, acting on glycosyl bonds	11
MF	GO:0016810	hydrolase activity, acting on carbon-nitrogen (but not peptide) bonds	1
MF	GO:0016829	lyase activity	6
MF	GO:0016853	isomerase activity	3
MF	GO:0016874	ligase activity	5
MF	GO:0016887	ATPase activity	8
MF	GO:0019899	enzyme binding	5
MF	GO:0022857	transmembrane transporter activity	45
MF	GO:0030234	enzyme regulator activity	9
MF	GO:0043167	ion binding	190
MF	GO:0051082	unfolded protein binding	4
BP	GO:0000902	cell morphogenesis	4
BP	GO:0005975	carbohydrate metabolic process	23
BP	GO:0006091	generation of precursor metabolites and energy	4
BP	GO:0006259	DNA metabolic process	49
BP	GO:0006397	mRNA processing	7
BP	GO:0006399	tRNA metabolic process	4
BP	GO:0006412	translation	27
BP	GO:0006457	protein folding	6
BP	GO:0006461	protein complex assembly	7
BP	GO:0006464	cellular protein modification process	50
BP	GO:0006520	cellular amino acid metabolic process	6
BP	GO:0006605	protein targeting	3
BP	GO:0006629	lipid metabolic process	16
BP	GO:0006790	sulfur compound metabolic process	4
BP	GO:0006810	transport	91
BP	GO:0006914	autophagy	1
BP	GO:0006950	response to stress	10
BP	GO:0007010	cytoskeleton organization	7
BP	GO:0007034	vacuolar transport	1
BP	GO:0007049	cell cycle	5
BP	GO:0007155	cell adhesion	1
BP	GO:0007165	signal transduction	43
BP	GO:0008150	biological_process	559
BP	GO:0009056	catabolic process	17
BP	GO:0009058	biosynthetic process	127
BP	GO:0016192	vesicle-mediated transport	7
BP	GO:0022607	cellular component assembly	11
BP	GO:0034641	cellular nitrogen compound metabolic process	179
BP	GO:0042254	ribosome biogenesis	4
BP	GO:0042592	homeostatic process	6
BP	GO:0044281	small molecule metabolic process	19
BP	GO:0048646	anatomical structure formation involved in morphogenesis	4
BP	GO:0048856	anatomical structure development	4
BP	GO:0050877	neurological system process	13
BP	GO:0051186	cofactor metabolic process	5
BP	GO:0051276	chromosome organization	6
BP	GO:0051604	protein maturation	2
BP	GO:0055085	transmembrane transport	40
BP	GO:0061024	membrane organization	3
BP	GO:0065003	macromolecular complex assembly	7
CC	GO:0000228	nuclear chromosome	4
CC	GO:0005575	cellular_component	283
CC	GO:0005576	extracellular region	11
CC	GO:0005578	proteinaceous extracellular matrix	1
CC	GO:0005615	extracellular space	9
CC	GO:0005622	intracellular	113
CC	GO:0005623	cell	120
CC	GO:0005634	nucleus	51
CC	GO:0005654	nucleoplasm	9
CC	GO:0005694	chromosome	8
CC	GO:0005730	nucleolus	3
CC	GO:0005737	cytoplasm	47
CC	GO:0005739	mitochondrion	6
CC	GO:0005783	endoplasmic reticulum	10
CC	GO:0005794	Golgi apparatus	6
CC	GO:0005840	ribosome	14
CC	GO:0005856	cytoskeleton	3
CC	GO:0005929	cilium	4
CC	GO:0043226	organelle	96
CC	GO:0043234	protein complex	46

## Sheet: Common-GO
Common elements in "Mi-MF", "Mj-MF" and "Ma-MF":							Common elements in "Mi-BP", "Mj-BP" and "Ma-BP":						Common elements in "Mi-CC", "Mj-CC" and "Ma-CC":
GO:0000166	nucleotide binding						GO:0001522	pseudouridine synthesis					GO:0005576	extracellular region
GO:0003676	nucleic acid binding						GO:0005975	carbohydrate metabolic process					GO:0005622	intracellular
GO:0003677	DNA binding						GO:0006260	DNA replication					GO:0005634	nucleus
GO:0003700	transcription factor activity, sequence-specific DNA binding						GO:0006281	DNA repair					GO:0005737	cytoplasm
GO:0003707	steroid hormone receptor activity						GO:0006355	regulation of transcription, DNA-templated					GO:0005840	ribosome
GO:0003723	RNA binding						GO:0006397	mRNA processing					GO:0016020	membrane
GO:0003735	structural constituent of ribosome						GO:0006412	translation					GO:0016021	integral component of membrane
GO:0003824	catalytic activity						GO:0006457	protein folding
GO:0003887	DNA-directed DNA polymerase activity						GO:0006468	protein phosphorylation
GO:0004176	ATP-dependent peptidase activity						GO:0006506	GPI anchor biosynthetic process
GO:0004185	serine-type carboxypeptidase activity						GO:0006508	proteolysis
GO:0004190	aspartic-type endopeptidase activity						GO:0006511	ubiquitin-dependent protein catabolic process
GO:0004222	metalloendopeptidase activity						GO:0006629	lipid metabolic process
GO:0004252	serine-type endopeptidase activity						GO:0006810	transport
GO:0004672	protein kinase activity						GO:0006811	ion transport
GO:0004867	serine-type endopeptidase inhibitor activity						GO:0006814	sodium ion transport
GO:0004930	G-protein coupled receptor activity						GO:0006886	intracellular protein transport
GO:0005085	guanyl-nucleotide exchange factor activity						GO:0007165	signal transduction
GO:0005215	transporter activity						GO:0007186	G-protein coupled receptor signaling pathway
GO:0005230	extracellular ligand-gated ion channel activity						GO:0007264	small GTPase mediated signal transduction
GO:0005509	calcium ion binding						GO:0008152	metabolic process
GO:0005515	protein binding						GO:0009190	cyclic nucleotide biosynthetic process
GO:0005524	ATP binding						GO:0009451	RNA modification
GO:0005525	GTP binding						GO:0015991	ATP hydrolysis coupled proton transport
GO:0008080	N-acetyltransferase activity						GO:0016192	vesicle-mediated transport
GO:0008107	galactoside 2-alpha-L-fucosyltransferase activity						GO:0035556	intracellular signal transduction
GO:0008158	hedgehog receptor activity						GO:0043401	steroid hormone mediated signaling pathway
GO:0008168	methyltransferase activity						GO:0045454	cell redox homeostasis
GO:0008234	cysteine-type peptidase activity						GO:0051260	protein homooligomerization
GO:0008236	serine-type peptidase activity						GO:0055085	transmembrane transport
GO:0008270	zinc ion binding						GO:0055114	oxidation-reduction process
GO:0008375	acetylglucosaminyltransferase activity
GO:0008408	3'-5' exonuclease activity
GO:0015078	hydrogen ion transmembrane transporter activity
GO:0016491	oxidoreductase activity
GO:0016627	oxidoreductase activity, acting on the CH-CH group of donors
GO:0016758	transferase activity, transferring hexosyl groups
GO:0016779	nucleotidyltransferase activity
GO:0016787	hydrolase activity
GO:0016788	hydrolase activity, acting on ester bonds
GO:0016849	phosphorus-oxygen lyase activity
GO:0043565	sequence-specific DNA binding
GO:0051536	iron-sulfur cluster binding
GO:0051539	4 iron, 4 sulfur cluster binding

## Sheet: Common-enriched-GO
							Common elements in "Mi-BP" and "Ma-BP":
							GO:0010564	regulation of cell cycle process

## Sheet: Common-GOSLIM
Common elements in "Mi-MF", "Mj-MF" and "Ma-MF":
GO:0001071	nucleic acid binding transcription factor activity						Common elements in "Mi-BP", "Mj-BP" and "Ma-BP":
GO:0003677	DNA binding						GO:0005975	carbohydrate metabolic process						Common elements in "Mi-CC", "Mj-CC" and "Ma-CC":
GO:0003723	RNA binding						GO:0006259	DNA metabolic process						GO:0005576	extracellular region
GO:0003735	structural constituent of ribosome						GO:0006397	mRNA processing						GO:0005622	intracellular
GO:0004518	nuclease activity						GO:0006412	translation						GO:0005623	cell
GO:0004871	signal transducer activity						GO:0006457	protein folding						GO:0005634	nucleus
GO:0005198	structural molecule activity						GO:0006461	protein complex assembly						GO:0005737	cytoplasm
GO:0008168	methyltransferase activity						GO:0006464	cellular protein modification process						GO:0005840	ribosome
GO:0008233	peptidase activity						GO:0006629	lipid metabolic process						GO:0043226	organelle
GO:0008289	lipid binding						GO:0006790	sulfur compound metabolic process						GO:0043234	protein complex
GO:0016301	kinase activity						GO:0006810	transport
GO:0016491	oxidoreductase activity						GO:0006950	response to stress
GO:0016746	transferase activity, transferring acyl groups						GO:0007049	cell cycle
GO:0016757	transferase activity, transferring glycosyl groups						GO:0007165	signal transduction
GO:0016779	nucleotidyltransferase activity						GO:0009056	catabolic process
GO:0016791	phosphatase activity						GO:0009058	biosynthetic process
GO:0016810	hydrolase activity, acting on carbon-nitrogen (but not peptide) bonds						GO:0016192	vesicle-mediated transport
GO:0016829	lyase activity						GO:0034641	cellular nitrogen compound metabolic process
GO:0016853	isomerase activity						GO:0042592	homeostatic process
GO:0016874	ligase activity						GO:0044281	small molecule metabolic process
GO:0016887	ATPase activity						GO:0051276	chromosome organization
GO:0022857	transmembrane transporter activity						GO:0055085	transmembrane transport
GO:0030234	enzyme regulator activity
GO:0043167	ion binding
