# Supplementary material for: Hybridization and polyploidy enable genomic plasticity without sex in the most devastating plant-parasitic nematodes
Source: PLoS Genet. 2017 Jun 8;13(6):e1006777. doi: 10.1371/journal.pgen.1006777 (PMC5465968; doi:10.1371/journal.pgen.1006777)
Supplement: S3 Table — (XLSX) [file pgen.1006777.s013.xlsx]

## Sheet: Minc-EDS-GO
Class	GO	Description	# in EDS		Class	GO	Description	# GO in copies	#copies with this GO	#GO in KaKs	#KaKs with this GO	raw_p_over	FDR_over
MF	GO:0005515	protein binding	21		MF	None	NA	NA	NA	NA	NA	NA	NA
MF	GO:0005524	ATP binding	11
MF	GO:0004672	protein kinase activity	6		Class	GO	Description	# GO in copies	#copies with this GO	#GO in KaKs	#KaKs with this GO	raw_p_over	FDR_over
MF	GO:0003824	catalytic activity	5		BP	None	NA	NA	NA	NA	NA	NA	NA
MF	GO:0003676	nucleic acid binding	4
MF	GO:0046872	metal ion binding	4		Class	GO	Description	# GO in copies	#copies with this GO	#GO in KaKs	#KaKs with this GO	raw_p_over	FDR_over
MF	GO:0003723	RNA binding	3		CC	None	NA	NA	NA	NA	NA	NA	NA
MF	GO:0003700	transcription factor activity, sequence-specific DNA binding	3
MF	GO:0016787	hydrolase activity	3
MF	GO:0005215	transporter activity	3
MF	GO:0008270	zinc ion binding	2
MF	GO:0003779	actin binding	2
MF	GO:0015631	tubulin binding	2
MF	GO:0016627	oxidoreductase activity, acting on the CH-CH group of donors	2
MF	GO:0000287	magnesium ion binding	2
MF	GO:0004427	inorganic diphosphatase activity	2
MF	GO:0005525	GTP binding	2
MF	GO:0004190	aspartic-type endopeptidase activity	2
MF	GO:0050660	flavin adenine dinucleotide binding	2
MF	GO:0003678	DNA helicase activity	2
MF	GO:0004619	phosphoglycerate mutase activity	2
MF	GO:0030145	manganese ion binding	2
MF	GO:0017176	phosphatidylinositol N-acetylglucosaminyltransferase activity	2
MF	GO:0016491	oxidoreductase activity	1
MF	GO:0004970	ionotropic glutamate receptor activity	1
MF	GO:0003707	steroid hormone receptor activity	1
MF	GO:0043565	sequence-specific DNA binding	1
MF	GO:0016714	oxidoreductase activity, acting on paired donors, with incorporation or reduction of molecular oxygen, reduced pteridine as one donor, and incorporation of one atom of oxygen	1
MF	GO:0042626	ATPase activity, coupled to transmembrane movement of substances	1
MF	GO:0016876	ligase activity, forming aminoacyl-tRNA and related compounds	1
MF	GO:0016810	hydrolase activity, acting on carbon-nitrogen (but not peptide) bonds	1
MF	GO:0005272	sodium channel activity	1
MF	GO:0008519	ammonium transmembrane transporter activity	1
MF	GO:0009982	pseudouridine synthase activity	1
MF	GO:0016853	isomerase activity	1
MF	GO:0004222	metalloendopeptidase activity	1
MF	GO:0003774	motor activity	1
MF	GO:0098599	palmitoyl hydrolase activity	1
MF	GO:0003995	acyl-CoA dehydrogenase activity	1
MF	GO:0016616	oxidoreductase activity, acting on the CH-OH group of donors, NAD or NADP as acceptor	1
MF	GO:0004357	glutamate-cysteine ligase activity	1
MF	GO:0000166	nucleotide binding	1
MF	GO:0004812	aminoacyl-tRNA ligase activity	1
MF	GO:0051536	iron-sulfur cluster binding	1
MF	GO:0004057	arginyltransferase activity	1
MF	GO:0004842	ubiquitin-protein transferase activity	1
MF	GO:0018024	histone-lysine N-methyltransferase activity	1
MF	GO:0008168	methyltransferase activity	1
BP	GO:0055114	oxidation-reduction process	6
BP	GO:0006468	protein phosphorylation	6
BP	GO:0006355	regulation of transcription, DNA-templated	4
BP	GO:0006810	transport	4
BP	GO:0008152	metabolic process	2
BP	GO:0006796	phosphate-containing compound metabolic process	2		CC	None
BP	GO:0006886	intracellular protein transport	2
BP	GO:0016192	vesicle-mediated transport	2
BP	GO:0006007	glucose catabolic process	2
BP	GO:0006506	GPI anchor biosynthetic process	2
BP	GO:0043401	steroid hormone mediated signaling pathway	1
BP	GO:0007165	signal transduction	1
BP	GO:0055085	transmembrane transport	1
BP	GO:0043039	tRNA aminoacylation	1
BP	GO:0006807	nitrogen compound metabolic process	1
BP	GO:0006814	sodium ion transport	1
BP	GO:0015696	ammonium transport	1
BP	GO:0008033	tRNA processing	1
BP	GO:0001522	pseudouridine synthesis	1
BP	GO:0009451	RNA modification	1
BP	GO:0005975	carbohydrate metabolic process	1
BP	GO:0006508	proteolysis	1
BP	GO:0006750	glutathione biosynthetic process	1
BP	GO:0010038	response to metal ion	1
BP	GO:0006418	tRNA aminoacylation for protein translation	1
BP	GO:0006364	rRNA processing	1
BP	GO:0016598	protein arginylation	1
BP	GO:0016567	protein ubiquitination	1
BP	GO:0034968	histone lysine methylation	1
BP	GO:0006397	mRNA processing	1
BP	GO:0030041	actin filament polymerization	1
BP	GO:0034314	Arp2/3 complex-mediated actin nucleation	1
BP	GO:0015031	protein transport	1
CC	GO:0016020	membrane	10
CC	GO:0016021	integral component of membrane	8
CC	GO:0005634	nucleus	6
CC	GO:0005737	cytoplasm	5
CC	GO:0005622	intracellular	2
CC	GO:0016459	myosin complex	1
CC	GO:0030117	membrane coat	1
CC	GO:0030131	clathrin adaptor complex	1
CC	GO:0032040	small-subunit processome	1
CC	GO:0005885	Arp2/3 protein complex	1
CC	GO:0015629	actin cytoskeleton	1
CC	GO:0005789	endoplasmic reticulum membrane	1

## Sheet: Minc-EDS-GOslim
Class	GO	Description	# in EDS		Class	GO	Description	# GO in copies	#copies with this GO	#GO in KaKs	#KaKs with this GO	raw_p_over	FDR_over
MF	GO:0016301	kinase activity	21		MF	None	NA	NA	NA	NA	NA	NA	NA
MF	GO:0016491	oxidoreductase activity	21
MF	GO:0016746	transferase activity, transferring acyl groups	7		Class	GO	Description	# GO in copies	#copies with this GO	#GO in KaKs	#KaKs with this GO	raw_p_over	FDR_over
MF	GO:0016853	isomerase activity	7		BP	None	NA	NA	NA	NA	NA	NA	NA
MF	GO:0001071	nucleic acid binding transcription factor activity	6
MF	GO:0016757	transferase activity, transferring glycosyl groups	6		Class	GO	Description	# GO in copies	#copies with this GO	#GO in KaKs	#KaKs with this GO	raw_p_over	FDR_over
MF	GO:0003674	molecular_function	5		CC	None	NA	NA	NA	NA	NA	NA	NA
MF	GO:0016810	hydrolase activity, acting on carbon-nitrogen (but not peptide) bonds	5
MF	GO:0008233	peptidase activity	4
MF	GO:0043167	ion binding	4
MF	GO:0004871	signal transducer activity	3
MF	GO:0008092	cytoskeletal protein binding	3
MF	GO:0016887	ATPase activity	3
MF	GO:0022857	transmembrane transporter activity	3
MF	GO:0003677	DNA binding	1
MF	GO:0003723	RNA binding	1
MF	GO:0004386	helicase activity	1
MF	GO:0008168	methyltransferase activity	1
MF	GO:0016874	ligase activity	1
BP	GO:0065003	macromolecular complex assembly	35
BP	GO:0009056	catabolic process	10
BP	GO:0005975	carbohydrate metabolic process	7
BP	GO:0006412	translation	7
BP	GO:0042254	ribosome biogenesis	7
BP	GO:0006397	mRNA processing	6
BP	GO:0006399	tRNA metabolic process	5
BP	GO:0006629	lipid metabolic process	4
BP	GO:0006464	cellular protein modification process	3
BP	GO:0006520	cellular amino acid metabolic process	3
BP	GO:0007010	cytoskeleton organization	3
BP	GO:0006790	sulfur compound metabolic process	2
BP	GO:0008150	biological_process	2
BP	GO:0009058	biosynthetic process	2
BP	GO:0051276	chromosome organization	2
BP	GO:0055085	transmembrane transport	2
BP	GO:0006461	protein complex assembly	1
BP	GO:0006810	transport	1
BP	GO:0007165	signal transduction	1
BP	GO:0016192	vesicle-mediated transport	1
BP	GO:0034641	cellular nitrogen compound metabolic process	1
CC	GO:0005575	cellular_component	7
CC	GO:0005737	cytoplasm	4
CC	GO:0005623	cell	3
CC	GO:0005634	nucleus	3
CC	GO:0043226	organelle	3
CC	GO:0005783	endoplasmic reticulum	2
CC	GO:0005622	intracellular	1
CC	GO:0005856	cytoskeleton	1
CC	GO:0043234	protein complex	1

## Sheet: Mjav-EDS-GO
Class	GO	Description	# in EDS		Class	GO	Description	# GO in copies	#copies with this GO	#GO in KaKs	#KaKs with this GO	raw_p_over	FDR_over
MF	GO:0005524	ATP binding	10		MF	None	NA	NA	NA	NA	NA	NA	NA
MF	GO:0005515	protein binding	7
MF	GO:0005525	GTP binding	7		Class	GO	Description	# GO in copies	#copies with this GO	#GO in KaKs	#KaKs with this GO	raw_p_over	FDR_over
MF	GO:0004930	G-protein coupled receptor activity	3		BP	None	NA	NA	NA	NA	NA	NA	NA
MF	GO:0016887	ATPase activity	3
MF	GO:0003677	DNA binding	3		Class	GO	Description	# GO in copies	#copies with this GO	#GO in KaKs	#KaKs with this GO	raw_p_over	FDR_over
MF	GO:0004672	protein kinase activity	2		CC	None	NA	NA	NA	NA	NA	NA	NA
MF	GO:0003735	structural constituent of ribosome	2
MF	GO:0030246	carbohydrate binding	2
MF	GO:0042626	ATPase activity, coupled to transmembrane movement of substances	2
MF	GO:0003824	catalytic activity	2
MF	GO:0008158	hedgehog receptor activity	2
MF	GO:0003676	nucleic acid binding	1
MF	GO:0030170	pyridoxal phosphate binding	1
MF	GO:0004298	threonine-type endopeptidase activity	1
MF	GO:0000166	nucleotide binding	1
MF	GO:0004812	aminoacyl-tRNA ligase activity	1
MF	GO:0008168	methyltransferase activity	1
MF	GO:0003916	DNA topoisomerase activity	1
MF	GO:0050660	flavin adenine dinucleotide binding	1
MF	GO:0004222	metalloendopeptidase activity	1
MF	GO:0008324	cation transmembrane transporter activity	1
MF	GO:0016813	hydrolase activity, acting on carbon-nitrogen (but not peptide) bonds, in linear amidines	1
MF	GO:0008234	cysteine-type peptidase activity	1
MF	GO:0019211	phosphatase activator activity	1
MF	GO:0005375	copper ion transmembrane transporter activity	1
MF	GO:0003723	RNA binding	1
MF	GO:0003883	CTP synthase activity	1
BP	GO:0055085	transmembrane transport	4
BP	GO:0007186	G-protein coupled receptor signaling pathway	3
BP	GO:0008152	metabolic process	3
BP	GO:0006810	transport	3
BP	GO:0006468	protein phosphorylation	2
BP	GO:0006412	translation	2
BP	GO:0006904	vesicle docking involved in exocytosis	2
BP	GO:0006508	proteolysis	2
BP	GO:0009058	biosynthetic process	1
BP	GO:0051603	proteolysis involved in cellular protein catabolic process	1
BP	GO:0006418	tRNA aminoacylation for protein translation	1
BP	GO:0007165	signal transduction	1
BP	GO:0016192	vesicle-mediated transport	1
BP	GO:0044237	cellular metabolic process	1
BP	GO:0006265	DNA topological change	1
BP	GO:0008033	tRNA processing	1
BP	GO:0006396	RNA processing	1
BP	GO:0006812	cation transport	1
BP	GO:0016560	protein import into peroxisome matrix, docking	1
BP	GO:0035434	copper ion transmembrane transport	1
BP	GO:0006221	pyrimidine nucleotide biosynthetic process	1
CC	GO:0016021	integral component of membrane	10
CC	GO:0005622	intracellular	2
CC	GO:0005840	ribosome	2
CC	GO:0016020	membrane	2
CC	GO:0005839	proteasome core complex	1
CC	GO:0005777	peroxisome	1
CC	GO:0000145	exocyst	1

## Sheet: Mjav-EDS-GOslim
Class	GO	Description	# in EDS		Class	GO	Description	# GO in copies	#copies with this GO	#GO in KaKs	#KaKs with this GO	raw_p_over	FDR_over
MF	GO:0003674	molecular_function	29		MF	None	NA	NA	NA	NA	NA	NA	NA
MF	GO:0043167	ion binding	12
MF	GO:0003677	DNA binding	3		Class	GO	Description	# GO in copies	#copies with this GO	#GO in KaKs	#KaKs with this GO	raw_p_over	FDR_over
MF	GO:0008233	peptidase activity	3		BP	None	NA	NA	NA	NA	NA	NA	NA
MF	GO:0016887	ATPase activity	3
MF	GO:0022857	transmembrane transporter activity	3		Class	GO	Description	# GO in copies	#copies with this GO	#GO in KaKs	#KaKs with this GO	raw_p_over	FDR_over
MF	GO:0003735	structural constituent of ribosome	2		CC	None	NA	NA	NA	NA	NA	NA	NA
MF	GO:0004871	signal transducer activity	2
MF	GO:0016301	kinase activity	2
MF	GO:0016874	ligase activity	2
MF	GO:0003723	RNA binding	1
MF	GO:0008168	methyltransferase activity	1
MF	GO:0016810	hydrolase activity, acting on carbon-nitrogen (but not peptide) bonds	1
MF	GO:0016853	isomerase activity	1
MF	GO:0030234	enzyme regulator activity	1
BP	GO:0008150	biological_process	17
BP	GO:0006810	transport	7
BP	GO:0055085	transmembrane transport	5
BP	GO:0006412	translation	3
BP	GO:0016192	vesicle-mediated transport	3
BP	GO:0034641	cellular nitrogen compound metabolic process	3
BP	GO:0006399	tRNA metabolic process	2
BP	GO:0006464	cellular protein modification process	2
BP	GO:0007165	signal transduction	2
BP	GO:0009058	biosynthetic process	2
BP	GO:0006259	DNA metabolic process	1
BP	GO:0006520	cellular amino acid metabolic process	1
BP	GO:0006605	protein targeting	1
BP	GO:0009056	catabolic process	1
BP	GO:0044281	small molecule metabolic process	1
BP	GO:0051276	chromosome organization	1
CC	GO:0005575	cellular_component	10
CC	GO:0005622	intracellular	4
CC	GO:0005623	cell	2
CC	GO:0005840	ribosome	2
CC	GO:0043234	protein complex	2
CC	GO:0005737	cytoplasm	1
CC	GO:0005777	peroxisome	1

## Sheet: Mare-EDS-GO
Class	GO	Description	# in EDS		Class	GO	Description	# GO in copies	#copies with this GO	#GO in KaKs	#KaKs with this GO	raw_p_over	FDR_over
MF	GO:0005515	protein binding	21		MF	None	NA	NA	NA	NA	NA	NA	NA
MF	GO:0003677	DNA binding	13
MF	GO:0005524	ATP binding	8		Class	GO	Description	# GO in copies	#copies with this GO	#GO in KaKs	#KaKs with this GO	raw_p_over	FDR_over
MF	GO:0003735	structural constituent of ribosome	7		BP	None	NA	NA	NA	NA	NA	NA	NA
MF	GO:0005525	GTP binding	6
MF	GO:0003723	RNA binding	5		Class	GO	Description	# GO in copies	#copies with this GO	#GO in KaKs	#KaKs with this GO	raw_p_over	FDR_over
MF	GO:0003676	nucleic acid binding	5		CC	None	NA	NA	NA	NA	NA	NA	NA
MF	GO:0046872	metal ion binding	5
MF	GO:0003899	DNA-directed RNA polymerase activity	5
MF	GO:0003824	catalytic activity	5
MF	GO:0004672	protein kinase activity	4
MF	GO:0008270	zinc ion binding	4
MF	GO:0000166	nucleotide binding	3
MF	GO:0004812	aminoacyl-tRNA ligase activity	3
MF	GO:0015078	hydrogen ion transmembrane transporter activity	3
MF	GO:0005509	calcium ion binding	3
MF	GO:0004784	superoxide dismutase activity	2
MF	GO:0005102	receptor binding	2
MF	GO:0004298	threonine-type endopeptidase activity	2
MF	GO:0051082	unfolded protein binding	2
MF	GO:0004421	hydroxymethylglutaryl-CoA synthase activity	2
MF	GO:0016757	transferase activity, transferring glycosyl groups	2
MF	GO:0004930	G-protein coupled receptor activity	1
MF	GO:0016887	ATPase activity	1
MF	GO:0016747	transferase activity, transferring acyl groups other than amino-acyl groups	1
MF	GO:0004332	fructose-bisphosphate aldolase activity	1
MF	GO:0016787	hydrolase activity	1
MF	GO:0003872	6-phosphofructokinase activity	1
MF	GO:0009055	electron carrier activity	1
MF	GO:0015035	protein disulfide oxidoreductase activity	1
MF	GO:0005247	voltage-gated chloride channel activity	1
MF	GO:0035091	phosphatidylinositol binding	1
MF	GO:0005272	sodium channel activity	1
MF	GO:0016853	isomerase activity	1
MF	GO:0005086	ARF guanyl-nucleotide exchange factor activity	1
MF	GO:0004222	metalloendopeptidase activity	1
MF	GO:0008479	queuine tRNA-ribosyltransferase activity	1
MF	GO:0008324	cation transmembrane transporter activity	1
MF	GO:0003743	translation initiation factor activity	1
MF	GO:0008158	hedgehog receptor activity	1
MF	GO:0005230	extracellular ligand-gated ion channel activity	1
MF	GO:0005215	transporter activity	1
MF	GO:0004527	exonuclease activity	1
MF	GO:0003700	transcription factor activity, sequence-specific DNA binding	1
MF	GO:0004579	dolichyl-diphosphooligosaccharide-protein glycotransferase activity	1
MF	GO:0016462	pyrophosphatase activity	1
MF	GO:0008137	NADH dehydrogenase (ubiquinone) activity	1
MF	GO:0003950	NAD+ ADP-ribosyltransferase activity	1
MF	GO:0004175	endopeptidase activity	1
MF	GO:0000287	magnesium ion binding	1
MF	GO:0004749	ribose phosphate diphosphokinase activity	1
BP	GO:0006412	translation	7
BP	GO:0006351	transcription, DNA-templated	5
BP	GO:0006468	protein phosphorylation	4
BP	GO:0006418	tRNA aminoacylation for protein translation	3
BP	GO:0015991	ATP hydrolysis coupled proton transport	3
BP	GO:0006355	regulation of transcription, DNA-templated	3
BP	GO:0006511	ubiquitin-dependent protein catabolic process	3
BP	GO:0006801	superoxide metabolic process	2
BP	GO:0055114	oxidation-reduction process	2
BP	GO:0007275	multicellular organismal development	2
BP	GO:0016055	Wnt signaling pathway	2
BP	GO:0051603	proteolysis involved in cellular protein catabolic process	2
BP	GO:0006457	protein folding	2
BP	GO:0006096	glycolytic process	2
BP	GO:0006814	sodium ion transport	2
BP	GO:0005992	trehalose biosynthetic process	2
BP	GO:0008299	isoprenoid biosynthetic process	2
BP	GO:0006396	RNA processing	2
BP	GO:0006810	transport	2
BP	GO:0007186	G-protein coupled receptor signaling pathway	1
BP	GO:0008152	metabolic process	1
BP	GO:0006813	potassium ion transport	1
BP	GO:0045454	cell redox homeostasis	1
BP	GO:0042254	ribosome biogenesis	1
BP	GO:0007165	signal transduction	1
BP	GO:0006821	chloride transport	1
BP	GO:0055085	transmembrane transport	1
BP	GO:0005975	carbohydrate metabolic process	1
BP	GO:0051016	barbed-end actin filament capping	1
BP	GO:0032012	regulation of ARF protein signal transduction	1
BP	GO:0006508	proteolysis	1
BP	GO:0006400	tRNA modification	1
BP	GO:0008616	queuosine biosynthetic process	1
BP	GO:0006812	cation transport	1
BP	GO:0006413	translational initiation	1
BP	GO:0006352	DNA-templated transcription, initiation	1
BP	GO:0006486	protein glycosylation	1
BP	GO:0006120	mitochondrial electron transport, NADH to ubiquinone	1
BP	GO:0051276	chromosome organization	1
BP	GO:0007029	endoplasmic reticulum organization	1
BP	GO:0051090	regulation of sequence-specific DNA binding transcription factor activity	1
BP	GO:0035307	positive regulation of protein dephosphorylation	1
BP	GO:0009165	nucleotide biosynthetic process	1
CC	GO:0016020	membrane	7
CC	GO:0005634	nucleus	6
CC	GO:0005840	ribosome	5
CC	GO:0016021	integral component of membrane	4
CC	GO:0005783	endoplasmic reticulum	3
CC	GO:0005622	intracellular	3
CC	GO:0005576	extracellular region	2
CC	GO:0005839	proteasome core complex	2
CC	GO:0033179	proton-transporting V-type ATPase, V0 domain	2
CC	GO:0033177	proton-transporting two-sector ATPase complex, proton-transporting domain	1
CC	GO:0005890	sodium:potassium-exchanging ATPase complex	1
CC	GO:0008290	F-actin capping protein complex	1
CC	GO:0005743	mitochondrial inner membrane	1
CC	GO:0005694	chromosome	1
CC	GO:0005789	endoplasmic reticulum membrane	1
CC	GO:0071595	Nem1-Spo7 phosphatase complex	1
CC	GO:0005739	mitochondrion	1
CC	GO:0019773	proteasome core complex, alpha-subunit complex	1

## Sheet: Mare-EDS-GOslim
Class	GO	Description	# in EDS		Class	GO	Description	# GO in copies	#copies with this GO	#GO in KaKs	#KaKs with this GO	raw_p_over	FDR_over
MF	GO:0003674	molecular_function	57		MF	None	NA	NA	NA	NA	NA	NA	NA
MF	GO:0043167	ion binding	20
MF	GO:0003677	DNA binding	8		Class	GO	Description	# GO in copies	#copies with this GO	#GO in KaKs	#KaKs with this GO	raw_p_over	FDR_over
MF	GO:0022857	transmembrane transporter activity	7		BP	None	NA	NA	NA	NA	NA	NA	NA
MF	GO:0003735	structural constituent of ribosome	6
MF	GO:0016301	kinase activity	5		Class	GO	Description	# GO in copies	#copies with this GO	#GO in KaKs	#KaKs with this GO	raw_p_over	FDR_over
MF	GO:0016757	transferase activity, transferring glycosyl groups	5		CC	None	NA	NA	NA	NA	NA	NA	NA
MF	GO:0008233	peptidase activity	4
MF	GO:0003723	RNA binding	3
MF	GO:0016491	oxidoreductase activity	3
MF	GO:0004871	signal transducer activity	2
MF	GO:0016746	transferase activity, transferring acyl groups	2
MF	GO:0016874	ligase activity	2
MF	GO:0001071	nucleic acid binding transcription factor activity	1
MF	GO:0004518	nuclease activity	1
MF	GO:0008135	translation factor activity, RNA binding	1
MF	GO:0008289	lipid binding	1
MF	GO:0016779	nucleotidyltransferase activity	1
MF	GO:0016829	lyase activity	1
MF	GO:0016853	isomerase activity	1
MF	GO:0016887	ATPase activity	1
MF	GO:0051082	unfolded protein binding	1
BP	GO:0008150	biological_process	45
BP	GO:0034641	cellular nitrogen compound metabolic process	14
BP	GO:0009058	biosynthetic process	11
BP	GO:0006810	transport	10
BP	GO:0006412	translation	9
BP	GO:0009056	catabolic process	7
BP	GO:0006464	cellular protein modification process	6
BP	GO:0005975	carbohydrate metabolic process	5
BP	GO:0044281	small molecule metabolic process	5
BP	GO:0006399	tRNA metabolic process	4
BP	GO:0007165	signal transduction	4
BP	GO:0055085	transmembrane transport	4
BP	GO:0006091	generation of precursor metabolites and energy	3
BP	GO:0006520	cellular amino acid metabolic process	2
BP	GO:0051186	cofactor metabolic process	2
BP	GO:0006457	protein folding	1
BP	GO:0006461	protein complex assembly	1
BP	GO:0006629	lipid metabolic process	1
BP	GO:0007010	cytoskeleton organization	1
BP	GO:0042254	ribosome biogenesis	1
BP	GO:0042592	homeostatic process	1
BP	GO:0051276	chromosome organization	1
BP	GO:0065003	macromolecular complex assembly	1
CC	GO:0005575	cellular_component	22
CC	GO:0005622	intracellular	9
CC	GO:0043234	protein complex	9
CC	GO:0005623	cell	8
CC	GO:0005634	nucleus	5
CC	GO:0005840	ribosome	5
CC	GO:0005783	endoplasmic reticulum	3
CC	GO:0043226	organelle	3
CC	GO:0005737	cytoplasm	2
CC	GO:0005739	mitochondrion	2
CC	GO:0005576	extracellular region	1
CC	GO:0005694	chromosome	1
CC	GO:0005856	cytoskeleton	1
CC	GO:0005886	plasma membrane	1

## Sheet: Common-GO
Common elements in "Mi-MF", "Mj-MF" and "Ma-MF":							Common elements in "Mi-BP", "Mj-MF" and "Ma-MF":							Common elements in "Mi-CC", "Mj-CC" and "Ma-MF":
GO:0005515	protein binding						GO:0006468	protein phosphorylation						GO:0016020	membrane
GO:0005524	ATP binding						GO:0006810	transport						GO:0016021	integral component of membrane
GO:0004672	protein kinase activity						GO:0008152	metabolic process						GO:0005622	intracellular
GO:0003824	catalytic activity						GO:0007165	signal transduction
GO:0003676	nucleic acid binding						GO:0055085	transmembrane transport						Common elements in "Mi-CC" and "Ma-MF":
GO:0003723	RNA binding						GO:0006508	proteolysis						GO:0005634	nucleus
GO:0005525	GTP binding						GO:0006418	tRNA aminoacylation for protein translation						GO:0005789	endoplasmic reticulum membrane
GO:0004222	metalloendopeptidase activity
GO:0000166	nucleotide binding						Common elements in "Mi-BP" and "Ma-MF":							Common elements in "Mj-CC" and "Ma-MF":
GO:0004812	aminoacyl-tRNA ligase activity						GO:0055114	oxidation-reduction process						GO:0005840	ribosome
							GO:0006355	regulation of transcription, DNA-templated						GO:0005839	proteasome core complex
							GO:0006814	sodium ion transport
Common elements in "Mj-MF" and "Ma-MF":							GO:0005975	carbohydrate metabolic process
GO:0004930	G-protein coupled receptor activity
GO:0016887	ATPase activity						Common elements in "Mj-MF" and "Ma-MF":
GO:0003677	DNA binding						GO:0007186	G-protein coupled receptor signaling pathway
GO:0003735	structural constituent of ribosome						GO:0006412	translation
GO:0008158	hedgehog receptor activity						GO:0051603	proteolysis involved in cellular protein catabolic process
GO:0004298	threonine-type endopeptidase activity						GO:0006396	RNA processing
GO:0008324	cation transmembrane transporter activity						GO:0006812	cation transport
Common elements in "Mi-MF" and "Ma-MF":							Common elements in "Mi-BP" and "Mj-MF":
GO:0046872	metal ion binding						GO:0016192	vesicle-mediated transport
GO:0003700	transcription factor activity, sequence-specific DNA binding						GO:0008033	tRNA processing
GO:0016787	hydrolase activity
GO:0005215	transporter activity
GO:0008270	zinc ion binding
GO:0000287	magnesium ion binding
GO:0005272	sodium channel activity
GO:0016853	isomerase activity
Common elements in "Mi-MF" and "Mj-MF":
GO:0050660	flavin adenine dinucleotide binding
GO:0042626	ATPase activity, coupled to transmembrane movement of substances
GO:0008168	methyltransferase activity

## Sheet: Common-GOslim
Common elements in "Mi-MF", "Mj-MF" and "Ma-MF":							Common elements in "Mi-BP", "Mj-BP" and "Ma-BP":							Common elements in "Mi-CC", "Mj-CC" and "Ma-CC":
GO:0016301	kinase activity						GO:0009056	catabolic process						GO:0005575	cellular_component
GO:0016853	isomerase activity						GO:0006412	translation						GO:0005737	cytoplasm
GO:0003674	molecular_function						GO:0006399	tRNA metabolic process						GO:0005623	cell
GO:0008233	peptidase activity						GO:0006464	cellular protein modification process						GO:0005622	intracellular
GO:0043167	ion binding						GO:0006520	cellular amino acid metabolic process						GO:0043234	protein complex
GO:0004871	signal transducer activity						GO:0008150	biological_process
GO:0016887	ATPase activity						GO:0009058	biosynthetic process						Common elements in "Mi-CC" and "Ma-CC":
GO:0022857	transmembrane transporter activity						GO:0051276	chromosome organization						GO:0005634	nucleus
GO:0003677	DNA binding						GO:0055085	transmembrane transport						GO:0043226	organelle
GO:0003723	RNA binding						GO:0006810	transport						GO:0005783	endoplasmic reticulum
GO:0016874	ligase activity						GO:0007165	signal transduction						GO:0005856	cytoskeleton
							GO:0034641	cellular nitrogen compound metabolic process
Common elements in "Mi-MF" and "Ma-MF":														Common elements in "Mj-CC" and "Ma-CC":
GO:0016491	oxidoreductase activity						Common elements in "Mi-BP" and "Ma-BP":							GO:0005840	ribosome
GO:0016746	transferase activity, transferring acyl groups						GO:0065003	macromolecular complex assembly
GO:0001071	nucleic acid binding transcription factor activity						GO:0005975	carbohydrate metabolic process
GO:0016757	transferase activity, transferring glycosyl groups						GO:0042254	ribosome biogenesis
							GO:0006629	lipid metabolic process
Common elements in "Mi-MF" and "Mj-MF":							GO:0007010	cytoskeleton organization
GO:0016810	hydrolase activity, acting on carbon-nitrogen (but not peptide) bonds						GO:0006461	protein complex assembly
GO:0008168	methyltransferase activity
							Common elements in "Mj-BP" and "Ma-BP":
Common elements in "Mj-MF" and "Ma-MF":							GO:0044281	small molecule metabolic process
GO:0003735	structural constituent of ribosome
							Common elements in "Mi-BP" and "Mj-BP":
							GO:0016192	vesicle-mediated transport

## Sheet: Common-EDS-KaKs-GO
Common elements in "EDS-MF" and "KaKS-MF":						Common elements in "EDS-BP" and "KaKS-BP":						Common elements in "EDS-CC" and "KaKS-CC":
GO:0005515	protein binding					GO:0006468	protein phosphorylation					GO:0005622	intracellular
GO:0005524	ATP binding					GO:0006810	transport
GO:0004672	protein kinase activity					GO:0008152	metabolic process
GO:0003824	catalytic activity					GO:0007165	signal transduction
GO:0003676	nucleic acid binding					GO:0055085	transmembrane transport
GO:0003723	RNA binding					GO:0006508	proteolysis
GO:0005525	GTP binding
GO:0004222	metalloendopeptidase activity
GO:0000166	nucleotide binding

## Sheet: Common-EDS-KaKs-GOSLIM
Common elements in "EDS-BP" and "KaKS-BP":						Common elements in "EDS-MF" and "KaKS-BP":
GO:0009056	catabolic process						kinase activity
GO:0006412	translation					GO:0016853	isomerase activity
GO:0006464	cellular protein modification process					GO:0008233	peptidase activity
GO:0009058						GO:0043167	ion binding
GO:0051276	chromosome organization					GO:0004871	signal transducer activity
GO:0055085	transmembrane transport					GO:0016887	ATPase activity
GO:0006810	transport					GO:0022857	transmembrane transporter activity
GO:0007165	signal transduction					GO:0003677	DNA binding
GO:0034641	cellular nitrogen compound metabolic process					GO:0003723	RNA binding
						GO:0016874	ligase activity
